# Supplementary material for: Trimeric and Dimeric Carbazole Alkaloids from Murraya microphylla
Source: MDPI journal article supplement (doi:10.3390/molecules26185689), 2021-09-20
Supplement: s1 [file s1]

**SUPPLEMENTARY MATERIAL**

**Nitrogen Oxide Inhibitory Trimeric and Dimeric Carbazole  
Alkaloids from *Murraya microphylla***

Xiaoli Ma, Hongwei Chen, Sisi Zhu, Pengfei Tu and Yong Jiang\*

*State Key Laboratory of Natural and Biomimetic Drugs, School of Pharmaceutical Sciences,*

*Peking University, Beijing 100191, P.R. China*

\*Corresponding author. E-mail: [yongjiang@bjmu.edu.cn](mailto:yongjiang@bjmu.edu.cn).

# CONTENTS

## For compound 1

**Figure S1** HRESIMS for compound 1.

**Figure S2** UV spectrum for compound 1.

**Figure S3**  $^1\text{H}$  NMR spectrum (400 MHz, acetone- $d_6$ ) of compound 1.

**Figure S4**  $^{13}\text{C}$  NMR spectrum (100 MHz, acetone- $d_6$ ) of compound 1.

**Figure S5** HSQC spectrum of compound 1.

**Figure S6** HMBC spectrum of compound 1.

## For compound 2

**Figure S7** HRESIMS for compound 2

**Figure S8**  $^1\text{H}$  NMR spectrum (400 MHz, acetone- $d_6$ ) of compound 2.

**Figure S9**  $^{13}\text{C}$  NMR spectrum (100 MHz, acetone- $d_6$ ) of compound 2.

**Figure S10** HSQC spectrum of compound 2.

**Figure S11** HMBC spectrum of compound 2.

**Figure S12** Key HMBC correlations of compounds 2.

## For compound 3

**Figure S13** HRESIMS for compound 3

**Figure S14**  $^1\text{H}$  NMR spectrum (400 MHz, acetone- $d_6$ ) of compound 3.

**Figure S15**  $^{13}\text{C}$  NMR spectrum (100 MHz, acetone- $d_6$ ) of compound 3.

**Figure S16** HSQC spectrum of compound 3.

**Figure S17** HMBC spectrum of compound 3.

**Figure S18** The chiral HPLC separation and experimental ECD data of compounds 3a and 3b.

**Figure S19** Key HMBC correlations of compounds 3.

## For compound 4

**Figure S20** HRESIMS for compound 4

**Figure S21**  $^1\text{H}$  NMR spectrum (400 MHz, acetone- $d_6$ ) of compound 4.

**Figure S22**  $^{13}\text{C}$  NMR spectrum (100 MHz, acetone- $d_6$ ) of compound 4.

**Figure S23** HSQC spectrum of compound 4.

**Figure S24** HMBC spectrum of compound 4.

**Figure S25** The chiral HPLC separation and experimental ECD data of compounds 4a and 4b.

**Figure S26** Key HMBC correlations of compounds 4.

## For compound 5

**Figure S27** HRESIMS for compound 5.

**Figure S28**  $^1\text{H}$  NMR spectrum (500 MHz, acetone- $d_6$ ) of compound 5.

**Figure S29**  $^{13}\text{C}$  NMR spectrum (125 MHz, acetone- $d_6$ ) of compound 5.

**Figure S30** HSQC spectrum of compound 5.

**Figure S31** HMBC spectrum of compound 5.

**Figure S32** The chiral HPLC separation and experimental ECD data of compounds **5a** and **5b**.

**For compound 6**

**Figure S33** HRESIMS for compound **6**.

**Figure S34**  $^1\text{H}$  NMR spectrum (500 MHz, acetone- $d_6$ ) of compound **6**.

**Figure S35**  $^{13}\text{C}$  NMR spectrum (125 MHz, acetone- $d_6$ ) of compound **6**.

**Figure S36** HSQC spectrum of compound **6**.

**Figure S37** HMBC spectrum of compound **6**.

**Figure S38** The chiral HPLC separation and experimental and calculated ECD data of compounds **6a** and **6b**.

**Figure S39** Key HMBC correlations of compounds **6**.

**For compound 7**

**Figure S40** HRESIMS for compound **7**.

**Figure S41**  $^1\text{H}$  NMR spectrum (400 MHz, acetone- $d_6$ ) of compound **7**.

**Figure S42**  $^{13}\text{C}$  NMR spectrum (100 MHz, acetone- $d_6$ ) of compound **7**.

**Figure S43** HSQC spectrum of compound **7**.

**Figure S44** HMBC spectrum of compound **7**.

**Figure S45** The chiral HPLC separation and experimental ECD data of compounds **7a** and **7b**.

**Figure S46** Key HMBC correlations of compounds **7**.

**For compound 8**

**Figure S47** HRESIMS for compound **8**.

**Figure S48**  $^1\text{H}$  NMR spectrum (400 MHz, acetone- $d_6$ ) of compound **8**.

**Figure S49**  $^{13}\text{C}$  NMR spectrum (100 MHz, acetone- $d_6$ ) of compound **8**.

**Figure S50** HSQC spectrum of compound **8**.

**Figure S51** HMBC spectrum of compound **8**.

**Figure S52** The chiral HPLC separation and experimental and calculated ECD data of compounds **8a** and **8b**.

**Figure S53** Key HMBC correlations of compounds **8**.

**For compound 9**

**Figure S54** HRESIMS for compound **9**.

**Figure S55**  $^1\text{H}$  NMR spectrum (400 MHz,  $\text{CDCl}_3$ ) of compound **9**.

**Figure S56**  $^{13}\text{C}$  NMR spectrum (100 MHz,  $\text{CDCl}_3$ ) of compound **9**.

**Figure S57** HSQC spectrum of compound **9**.

**Figure S58** HMBC spectrum of compound **9**.

**Figure S59** The chiral HPLC separation and experimental ECD data of compounds **9a** and **9b**.

**Figure S60** Key HMBC correlations of compounds **9**.

**For compound 10**

**Figure S61** HRESIMS for compound **10**.

**Figure S62**  $^1\text{H}$  NMR spectrum (500 MHz, acetone- $d_6$ ) of compound **10**.

**Figure S63**  $^{13}\text{C}$  NMR spectrum (125 MHz, acetone- $d_6$ ) of compound **10**.

**Figure S64** HSQC spectrum of compound **10**.

**Figure S65** HMBC spectrum of compound **10**.

**Figure S66** The chiral HPLC separation and experimental and calculated ECD data of compounds **10a** and **10b**.

**Figure S67** Key HMBC correlations of compounds **10**.

**For compound 11**

**Figure S68** HRESIMS for compound **11**.

**Figure S69**  $^1\text{H}$  NMR spectrum (500 MHz, acetone- $d_6$ ) of compound **11**.

**Figure S70**  $^{13}\text{C}$  NMR spectrum (125 MHz, acetone- $d_6$ ) of compound **11**.

**Figure S71** HSQC spectrum of compound **11**.

**Figure S72** HMBC spectrum of compound **11**.

**Figure S73** The chiral HPLC separation and experimental and calculated ECD data of compounds **11a** and **11b**.

**Figure S74** Key HMBC correlations of compounds **11**.

**For compound 12**

**Figure S75** HRESIMS for compound **12**.

**Figure S76**  $^1\text{H}$  NMR spectrum (400 MHz, acetone- $d_6$ ) of compound **12**.

**Figure S77**  $^{13}\text{C}$  NMR spectrum (100 MHz, acetone- $d_6$ ) of compound **12**.

**Figure S78** HSQC spectrum of compound **12**.

**Figure S79** HMBC spectrum of compound **12**.

**Figure S80** Key HMBC correlations of compounds **12**.

**For compound 13**

**Figure S81** HRESIMS for compound **13**.

**Figure S82**  $^1\text{H}$  NMR spectrum (400 MHz, acetone- $d_6$ ) of compound **13**.

**Figure S83**  $^{13}\text{C}$  NMR spectrum (100 MHz, acetone- $d_6$ ) of compound **13**.

**Figure S84** HSQC spectrum of compound **13**.

**Figure S85** HMBC spectrum of compound **13**.

**Figure S86** The chiral HPLC separation and experimental and calculated ECD data of compounds **13a** and **13b**.

**Figure S87** Key HMBC correlations of compounds **13**.

**For compound 14**

**Figure S88** HRESIMS for compound **14**.

**Figure S89**  $^1\text{H}$  NMR spectrum (500 MHz, acetone- $d_6$ ) of compound **14**.

**Figure S90**  $^{13}\text{C}$  NMR spectrum (125 MHz, acetone- $d_6$ ) of compound **14**.

**Figure S91** HSQC spectrum of compound **14**.

**Figure S92** HMBC spectrum of compound **14**.

**Figure S93** The chiral HPLC separation and experimental and calculated ECD data of compounds **14a** and **14b**.

**Figure S94** Key HMBC correlations of compounds **14**.

**For compound 15**

**Figure S95** HRESIMS for compound **15**.

**Figure S96**  $^1\text{H}$  NMR spectrum (500 MHz, acetone- $d_6$ ) of compound **15**.

**Figure S97**  $^{13}\text{C}$  NMR spectrum (125 MHz, acetone- $d_6$ ) of compound **15**.

**Figure S98** HSQC spectrum of compound **15**.

**Figure S99** HMBC spectrum of compound **15**.

**Figure S100** The chiral HPLC separation and experimental and calculated ECD data of compounds **15a** and **15b**.

**For compound 16**

**Figure S101** HRESIMS for compound **16**.

**Figure S102**  $^1\text{H}$  NMR spectrum (500 MHz, acetone- $d_6$ ) of compound **16**.

**Figure S103**  $^{13}\text{C}$  NMR spectrum (125 MHz, acetone- $d_6$ ) of compound **16**.

**Figure S104** HSQC spectrum of compound **16**.

**Figure S105** HMBC spectrum of compound **16**.

**Figure S106** The chiral HPLC separation and experimental and calculated ECD data of compounds **16a** and **16b**.

**Figure S107** Key HMBC correlations of compounds **16**.

**For compound 17**

**Figure S108** HRESIMS for compound **17**.

**Figure S109**  $^1\text{H}$  NMR spectrum (400 MHz, acetone- $d_6$ ) of compound **17**.

**Figure S110**  $^{13}\text{C}$  NMR spectrum (100 MHz, acetone- $d_6$ ) of compound **17**.

**Figure S111** HSQC spectrum of compound **17**.

**Figure S112** HMBC spectrum of compound **17**.

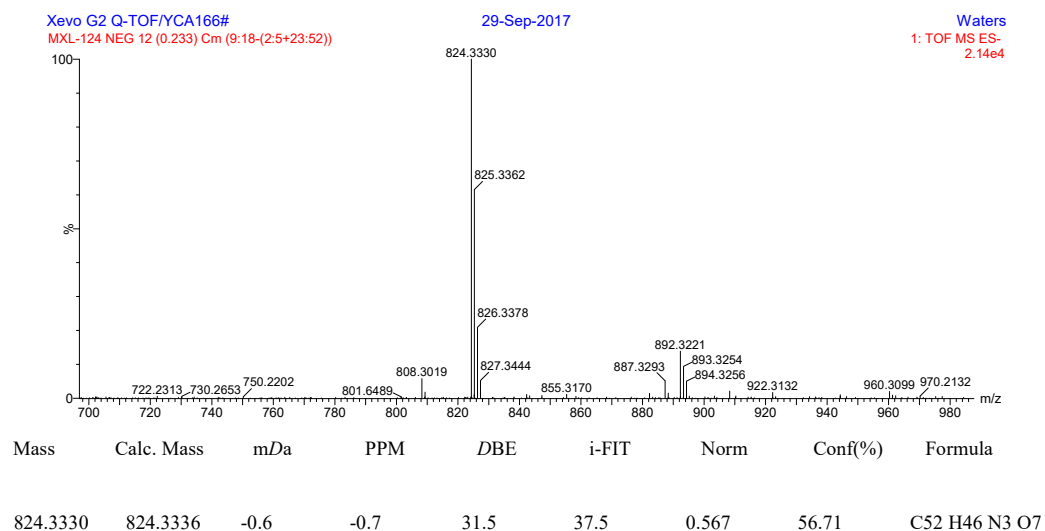

**Figure S1** HRESIMS for compound **1**.

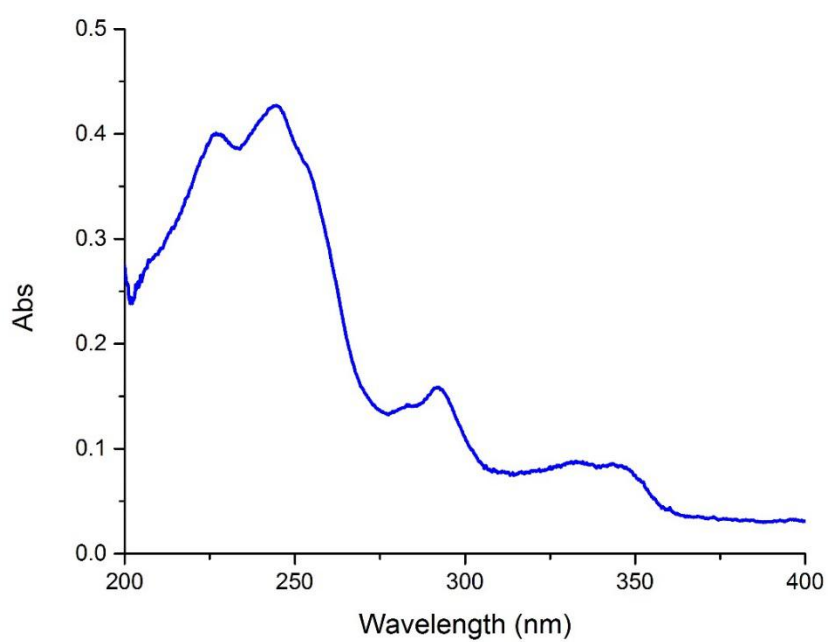

**Figure S2** UV spectrum for compound **1**.

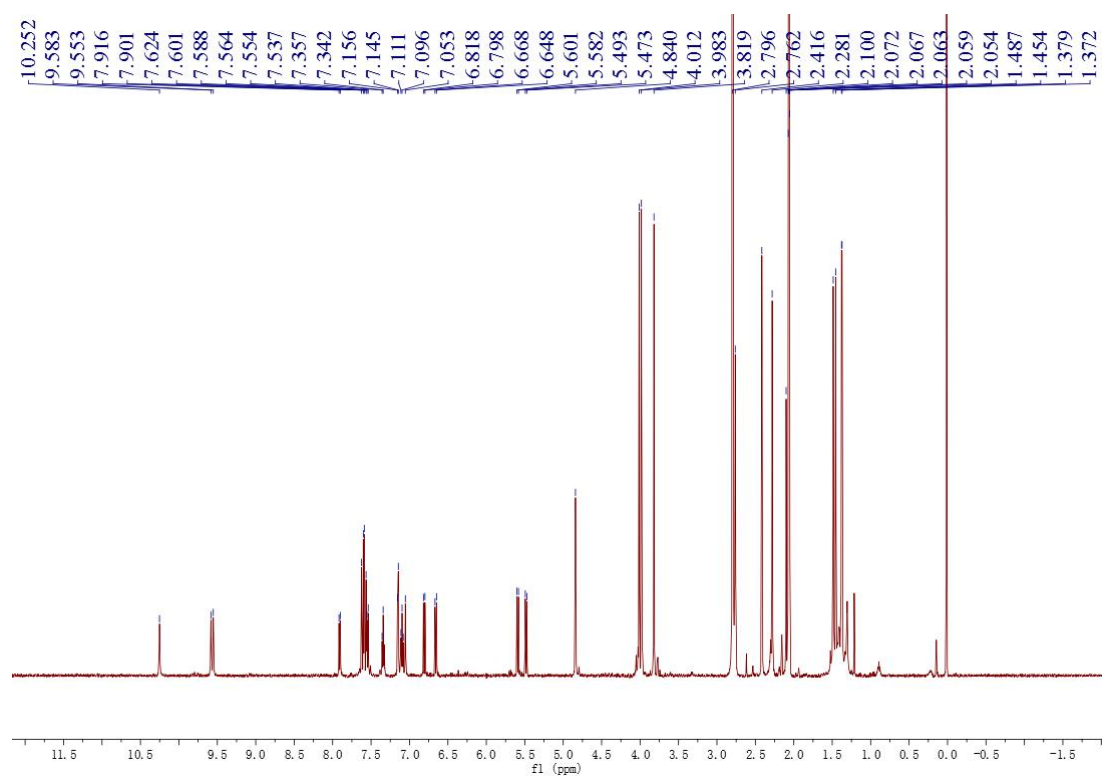

**Figure S3** <sup>1</sup>H NMR spectrum (400 MHz, acetone-*d*<sub>6</sub>) of compound **1**.

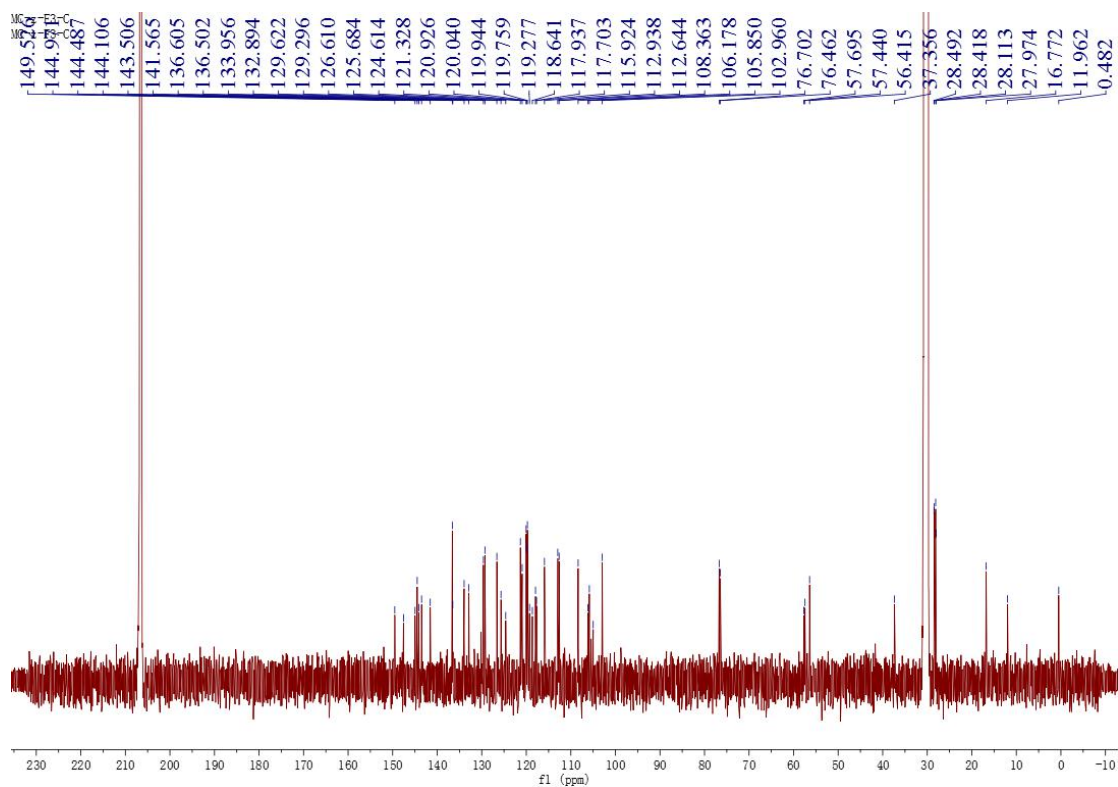

**Figure S4** <sup>13</sup>C NMR spectrum (100 MHz, acetone-*d*<sub>6</sub>) of compound **1**.

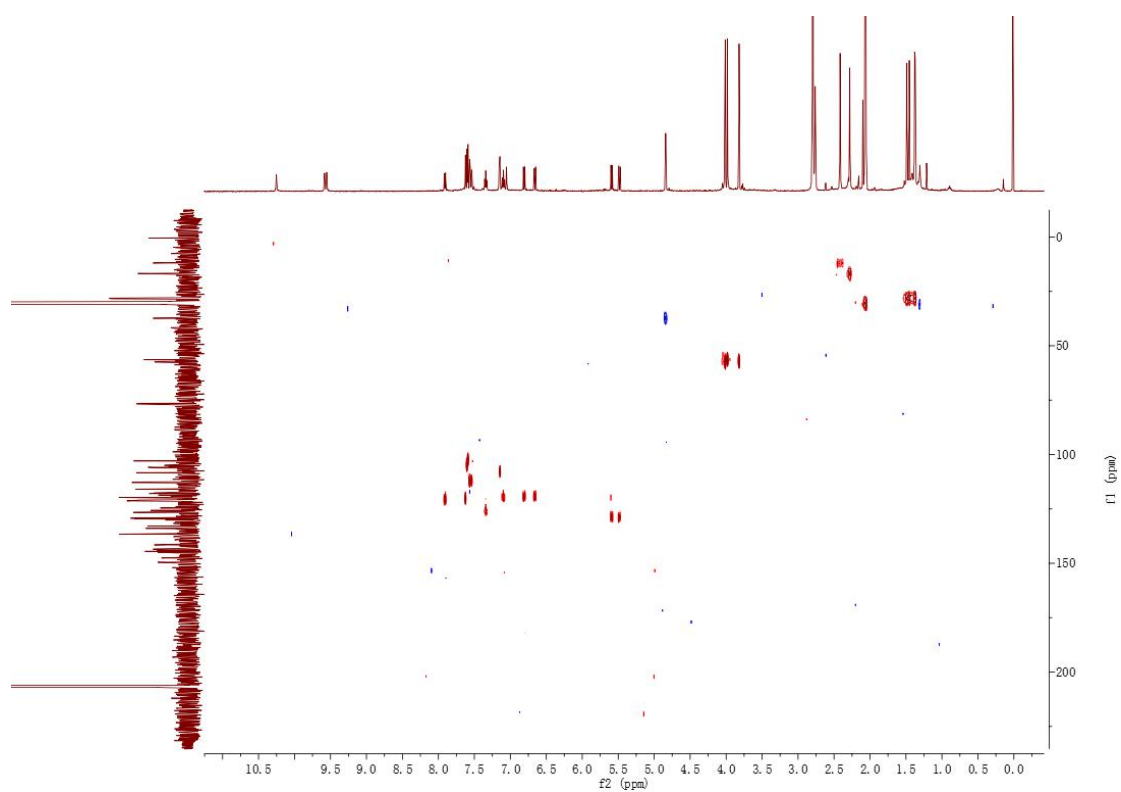

**Figure S5** HSQC spectrum of compound **1**.

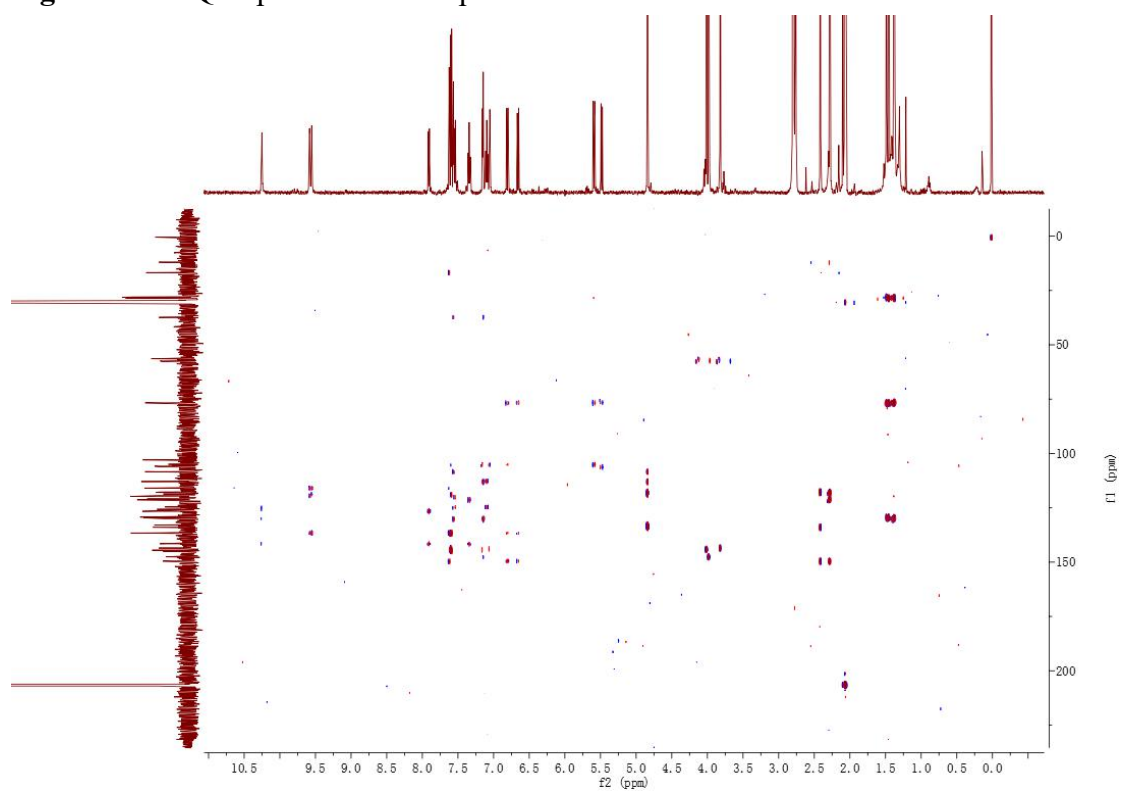

**Figure S6** HMBC spectrum of compound **1**.



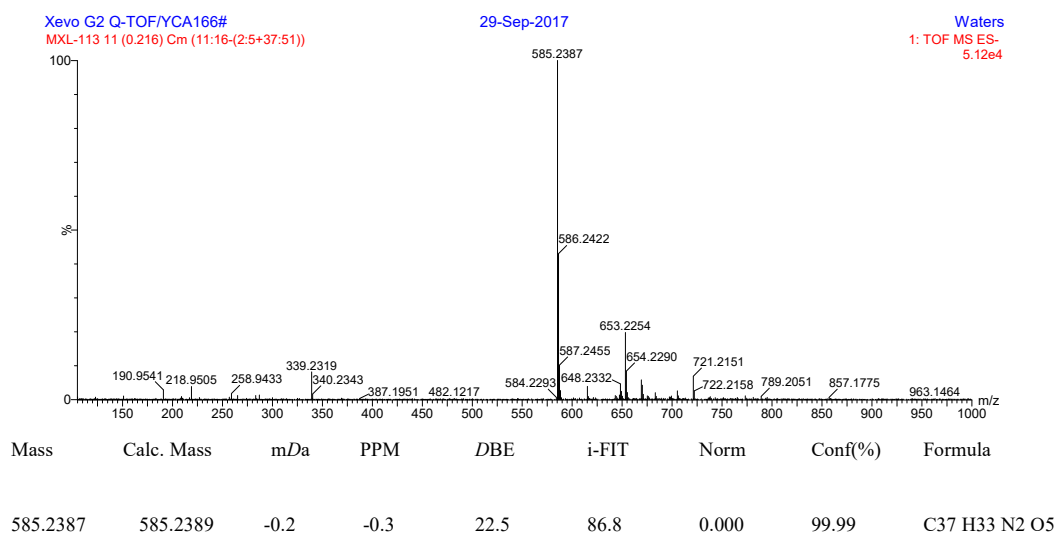

**Figure S7** HRESIMS for compound **2**

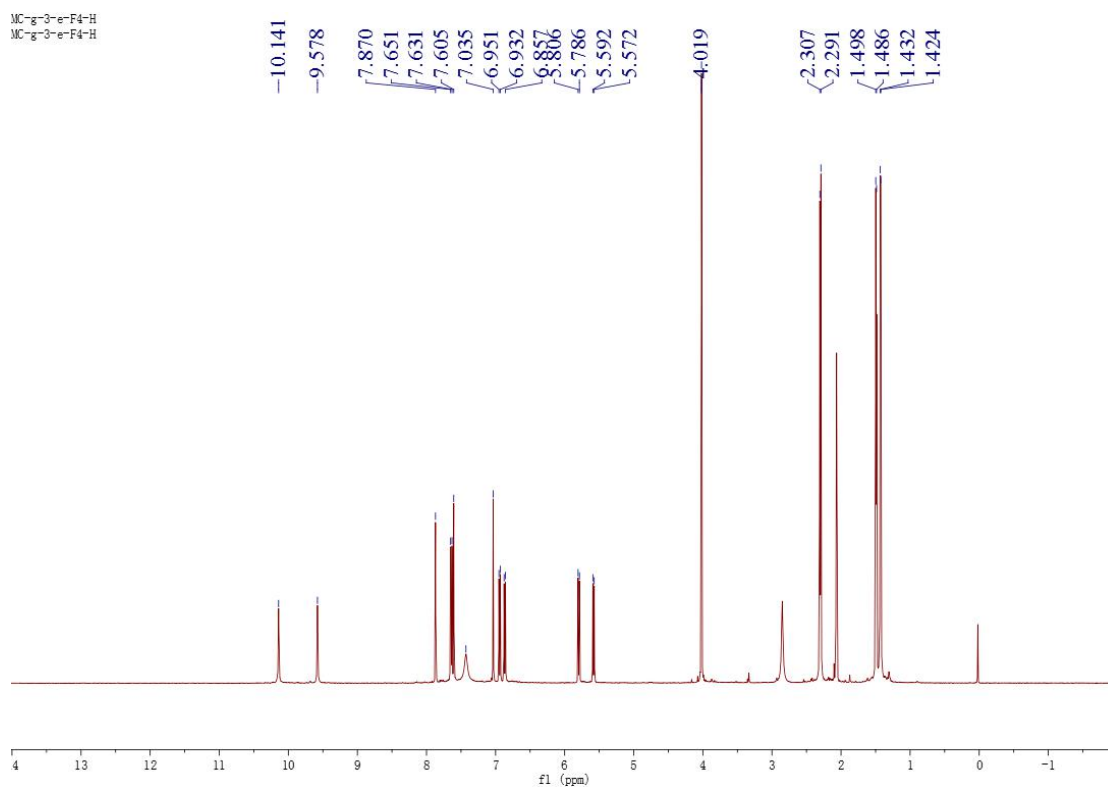

**Figure S8**  $^1\text{H}$  NMR spectrum (400 MHz, acetone- $d_6$ ) of compound **2**.

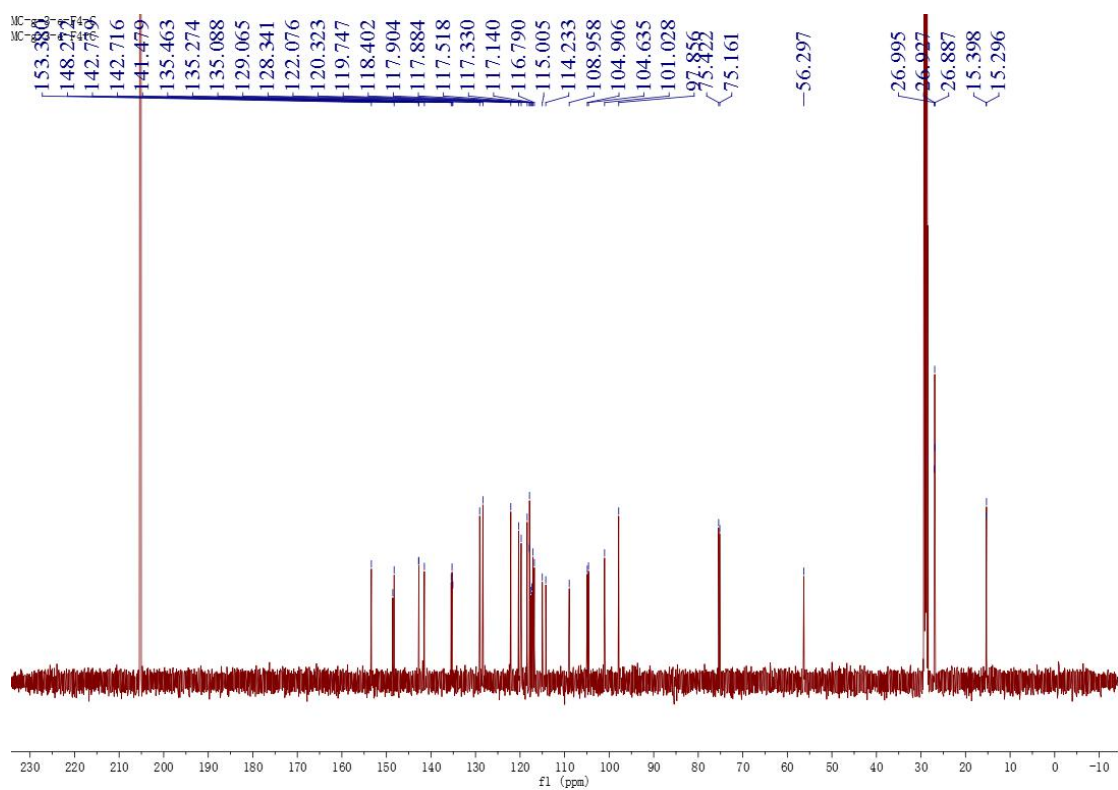

**Figure S9**  $^{13}\text{C}$  NMR spectrum (100 MHz, acetone- $d_6$ ) of compound **2**.

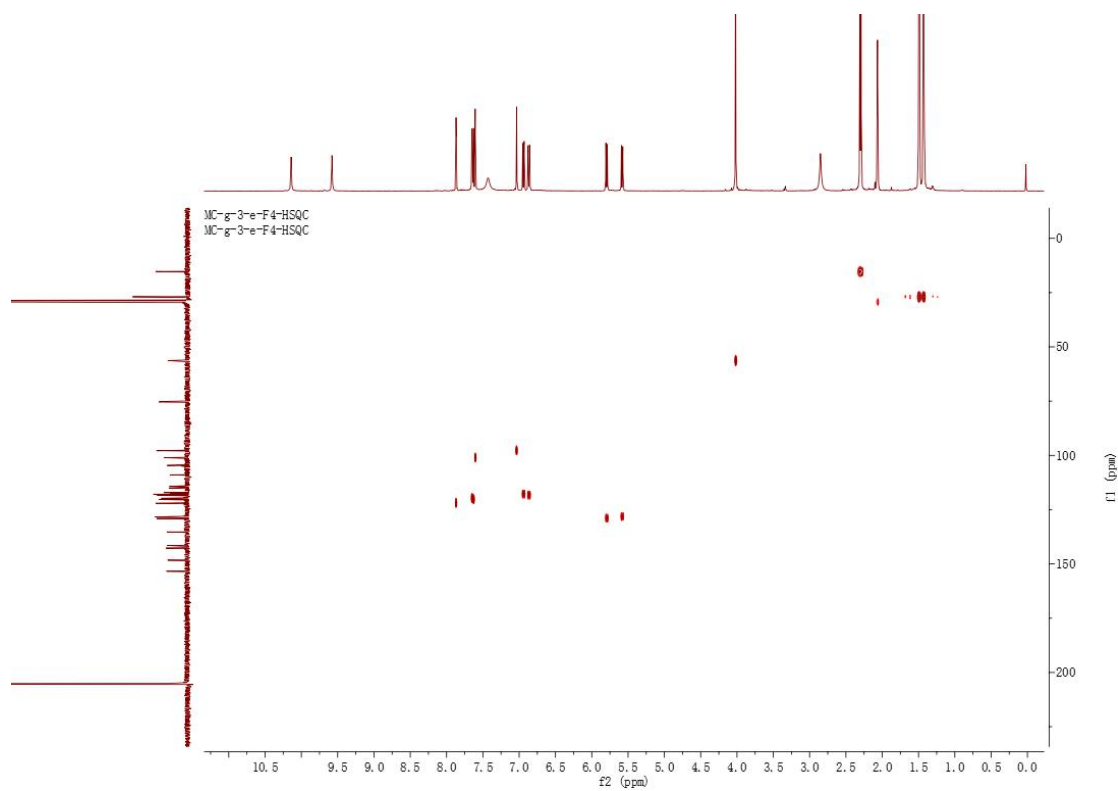

**Figure S10** HSQC spectrum of compound **2**.

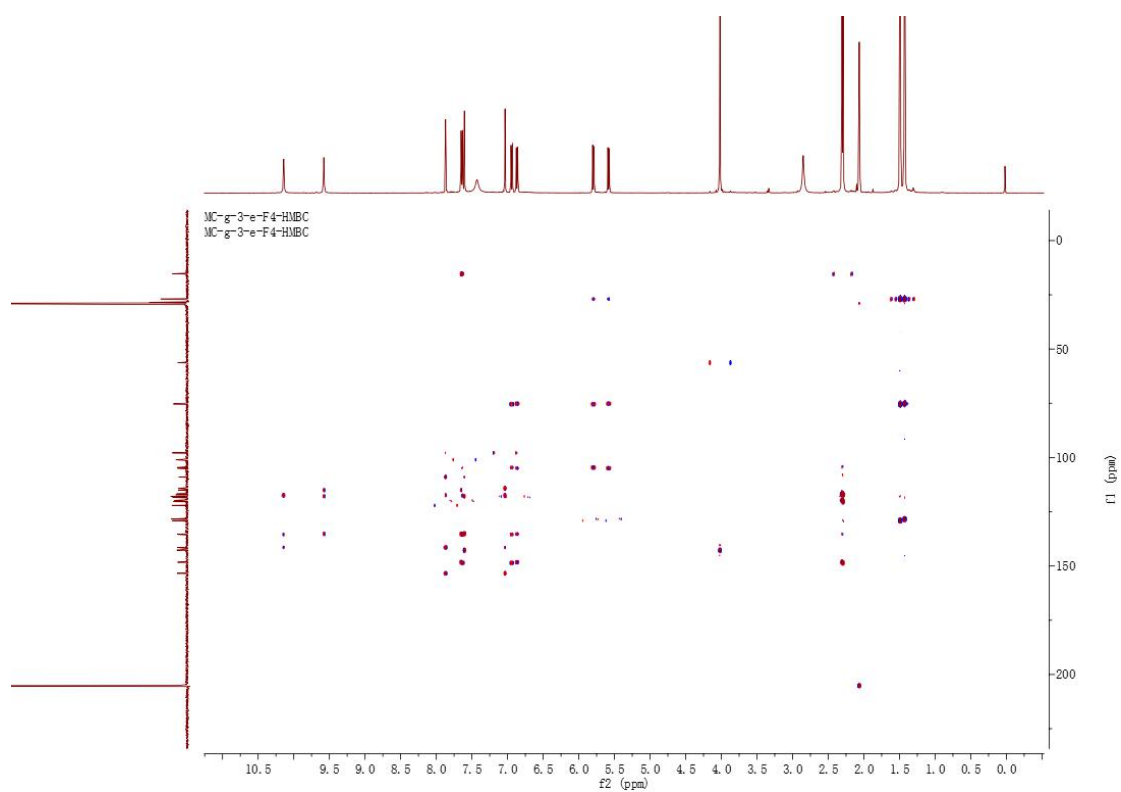

**Figure S11** HMBC spectrum of compound **2**.

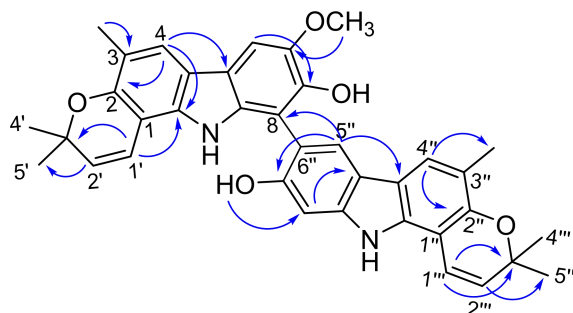

**Figure S12** Key HMBC correlations of compounds **2**.

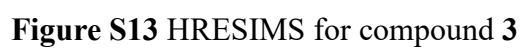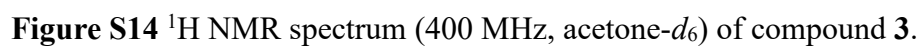

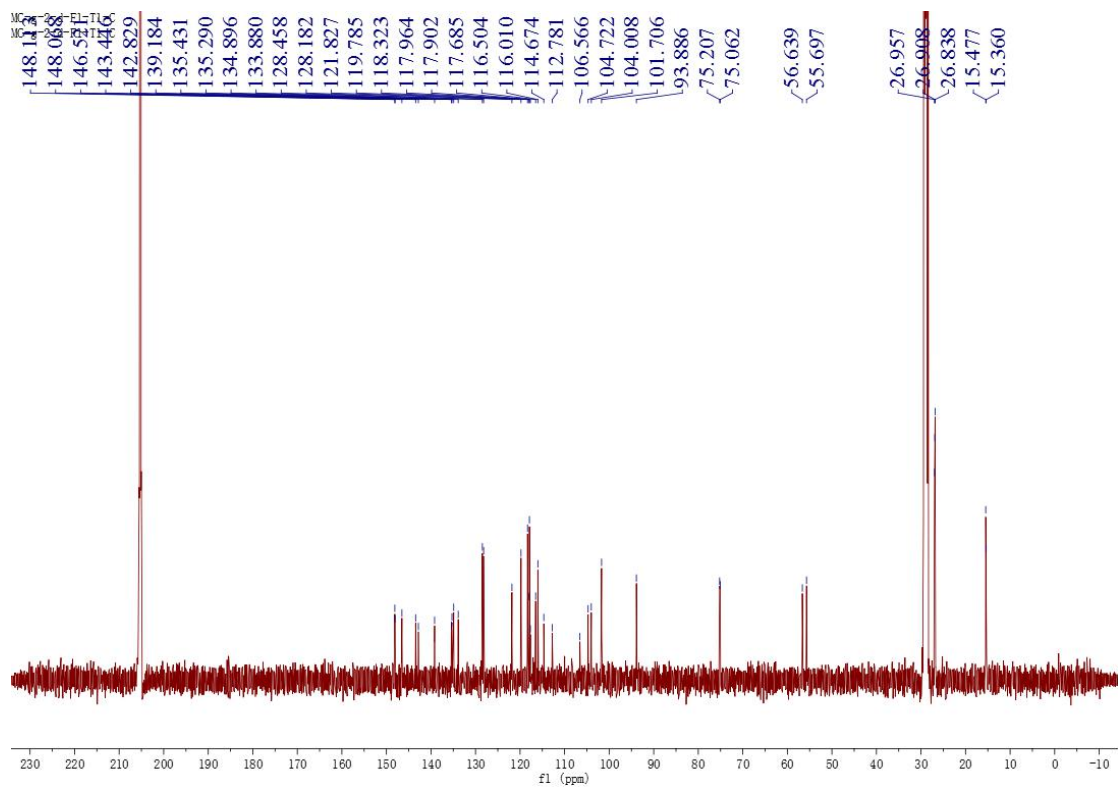

**Figure S15**  $^{13}\text{C}$  NMR spectrum (100 MHz, acetone- $d_6$ ) of compound **3**.

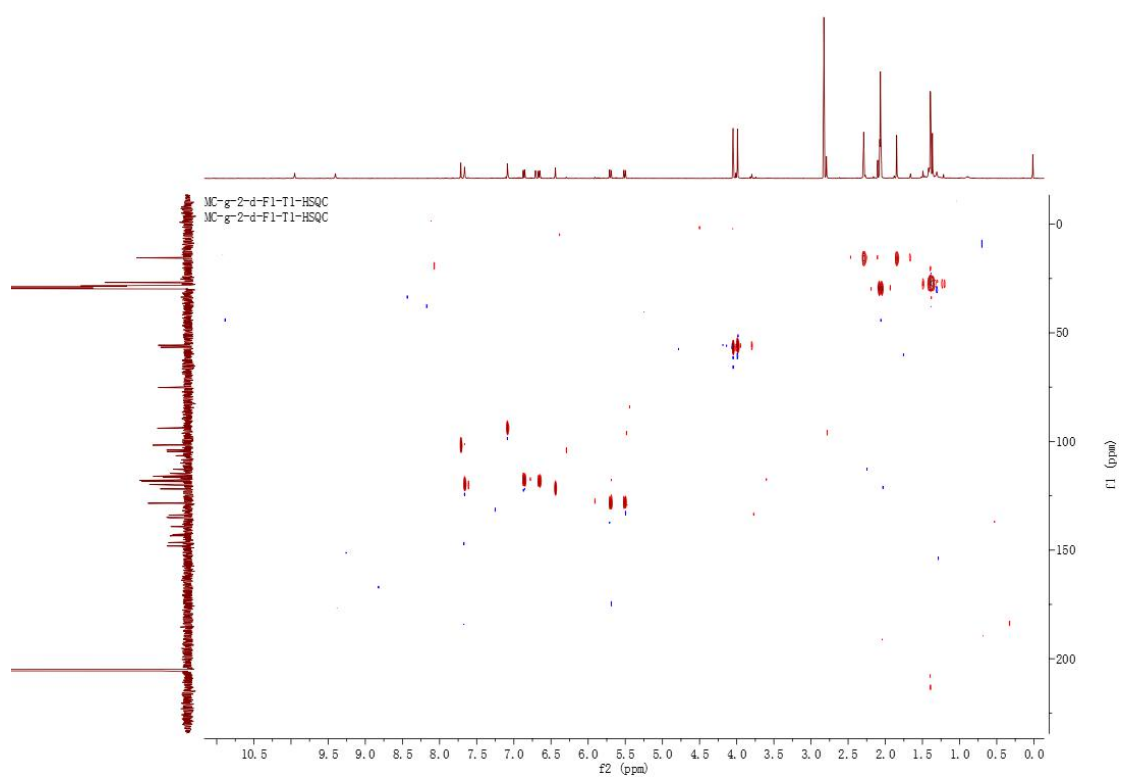

**Figure S16** HSQC spectrum of compound **3**.

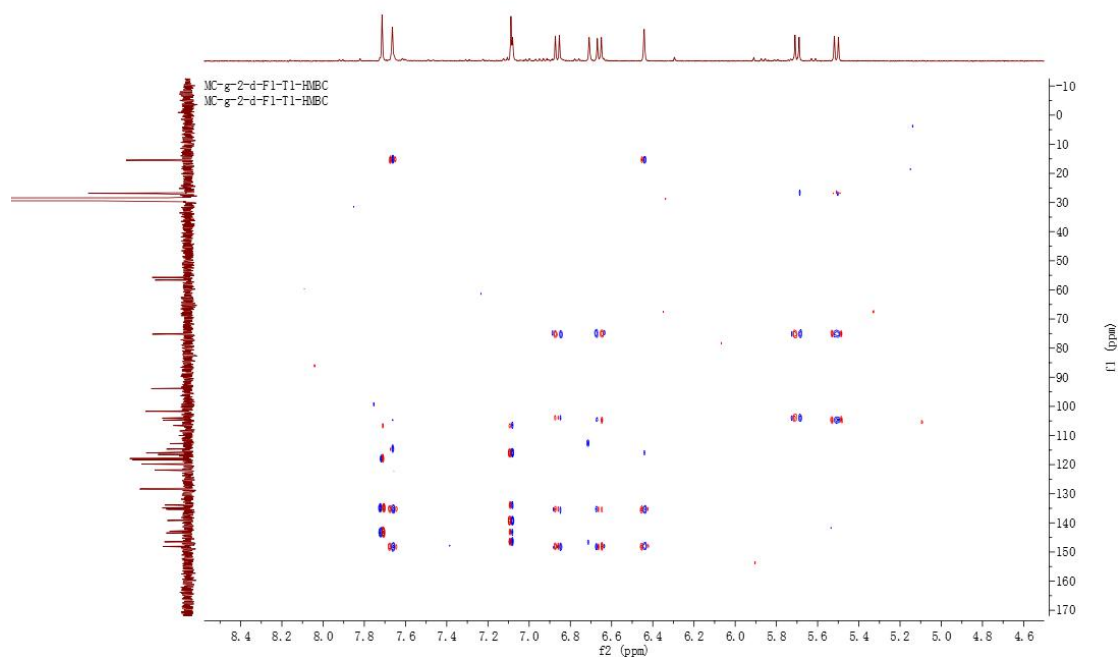

**Figure S17** HMBC spectrum of compound **3**.

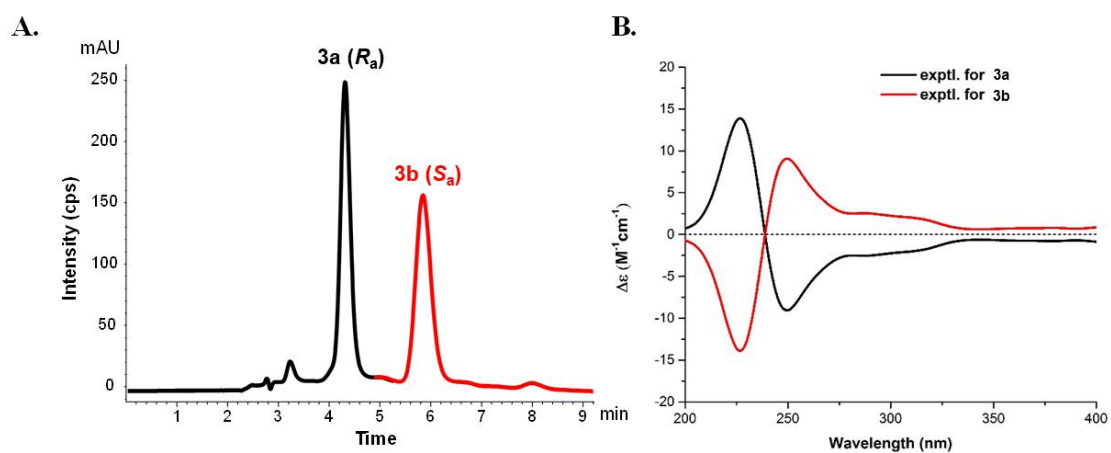

**Figure S18** The chiral HPLC separation (A) and experimental ECD data (B) of compounds **3a** and **3b**.

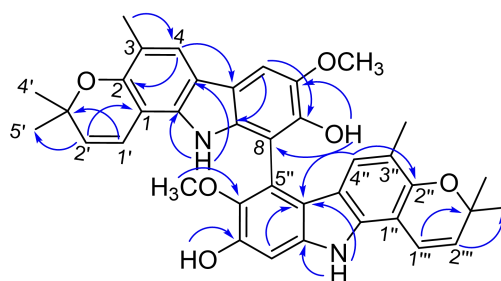

**Figure S19** Key HMBC correlations of compounds **3**.

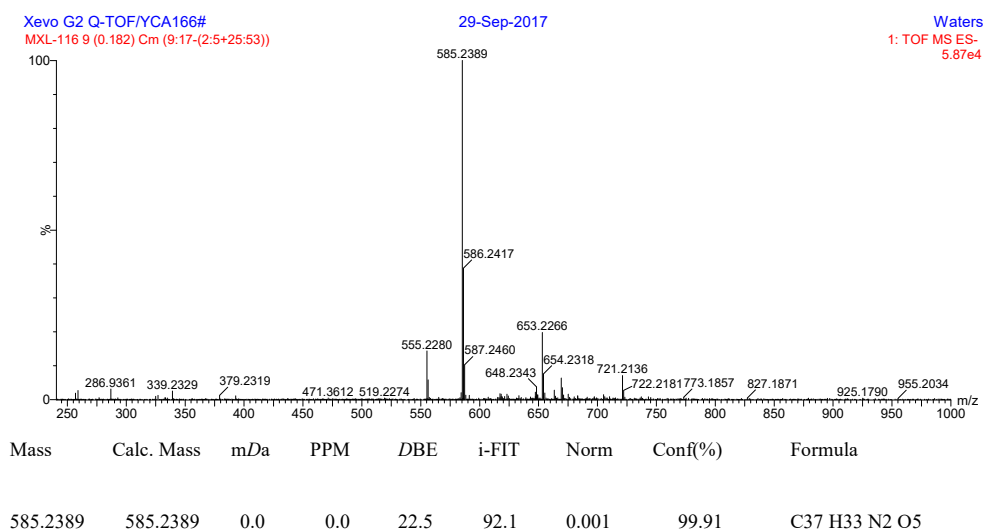

**Figure S20** HRESIMS for compound **4**

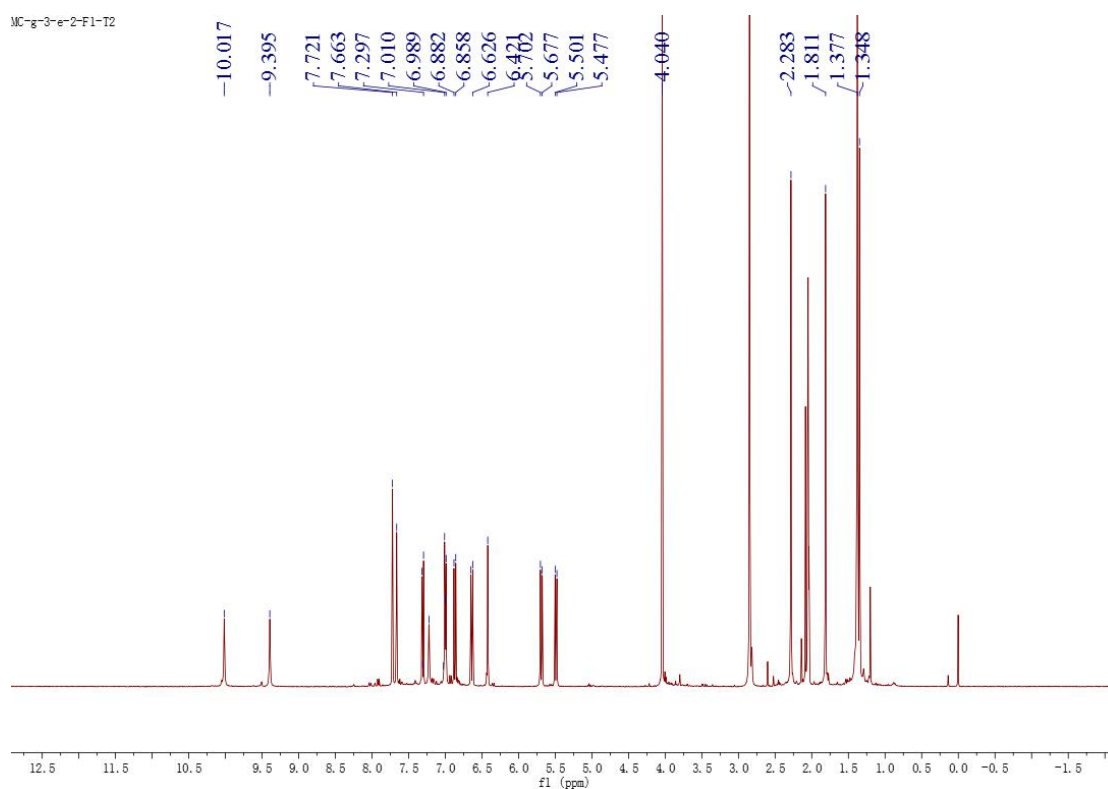

**Figure S21**  $^1\text{H}$  NMR spectrum (400 MHz, acetone- $d_6$ ) of compound **4**.

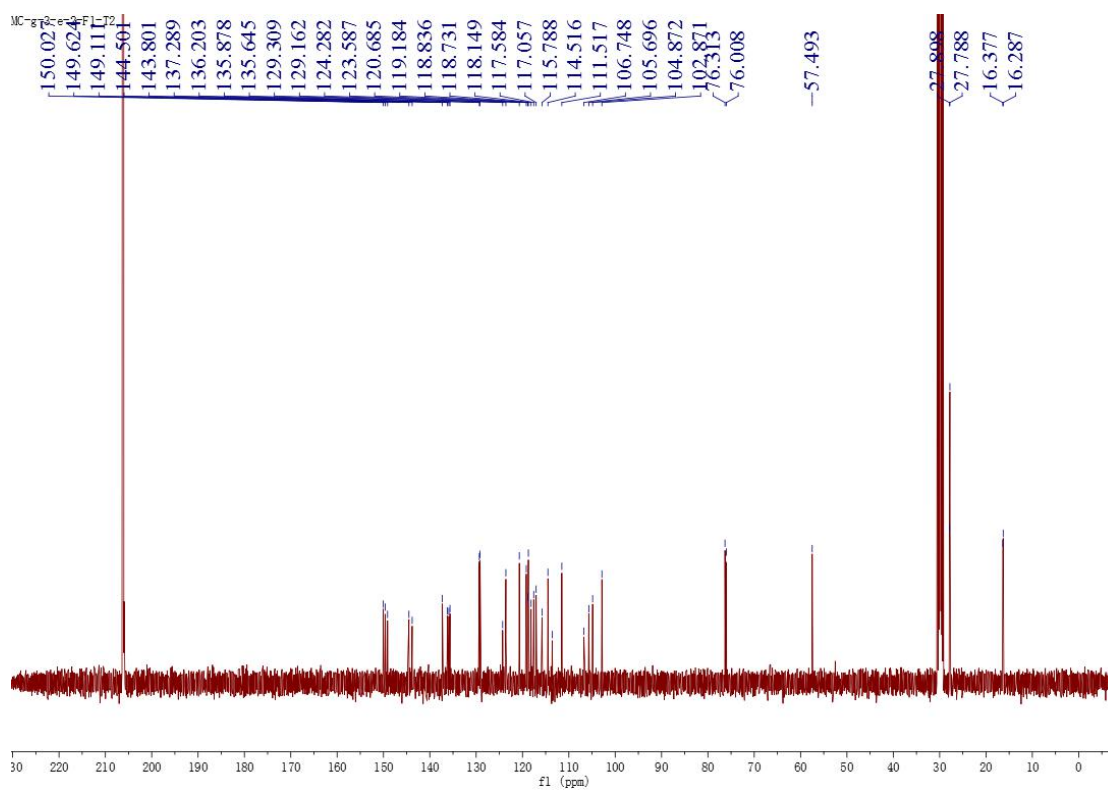

**Figure S22**  $^{13}\text{C}$  NMR spectrum (100 MHz, acetone- $d_6$ ) of compound **4**.

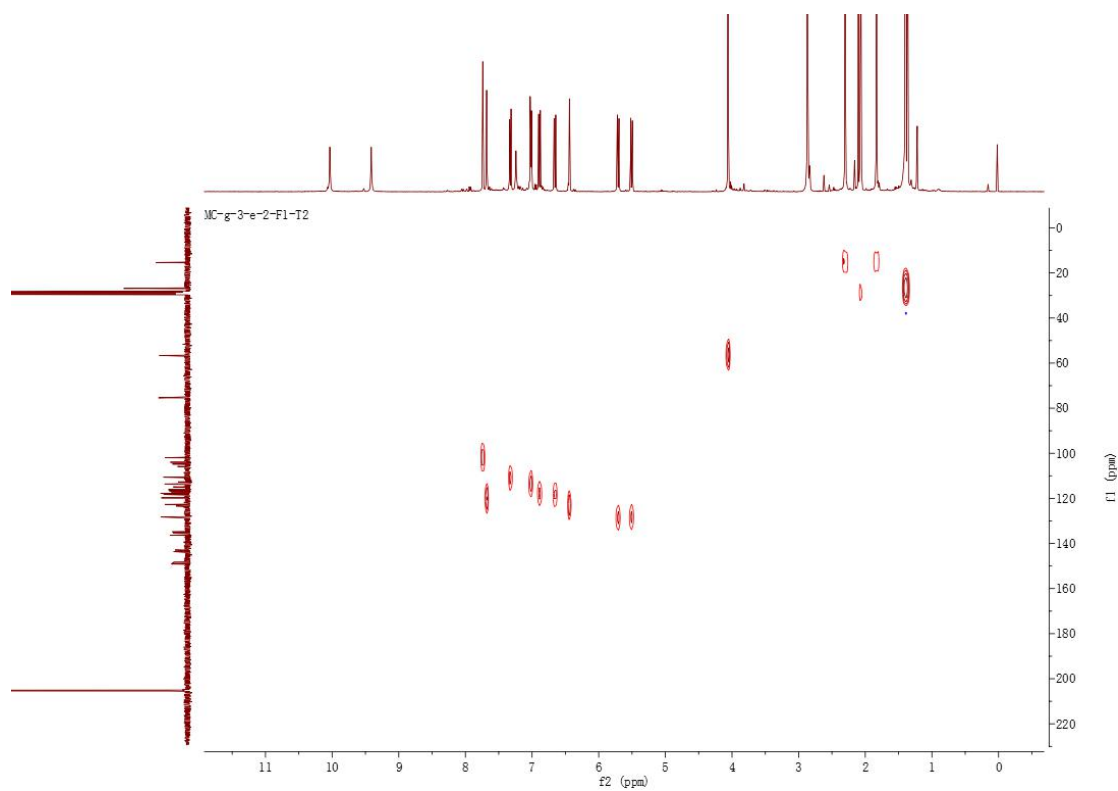

**Figure S23** HSQC spectrum of compound **4**.



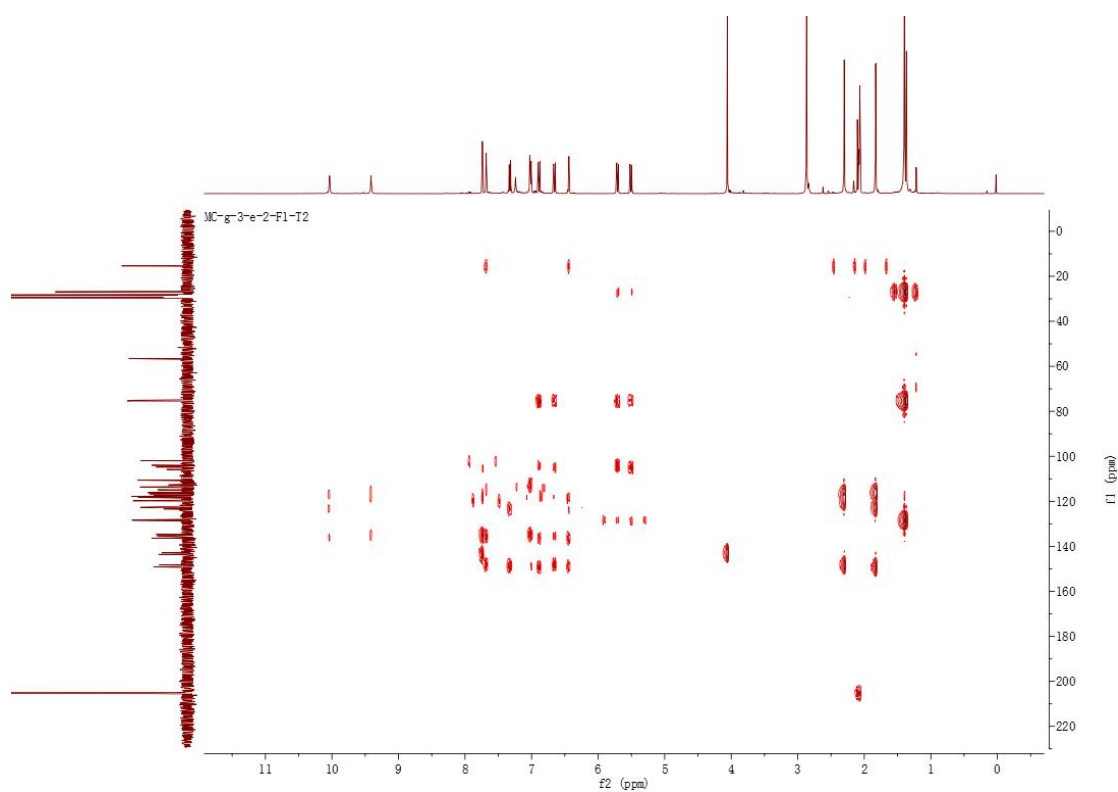

**Figure S24** HMBC spectrum of compound **4**.

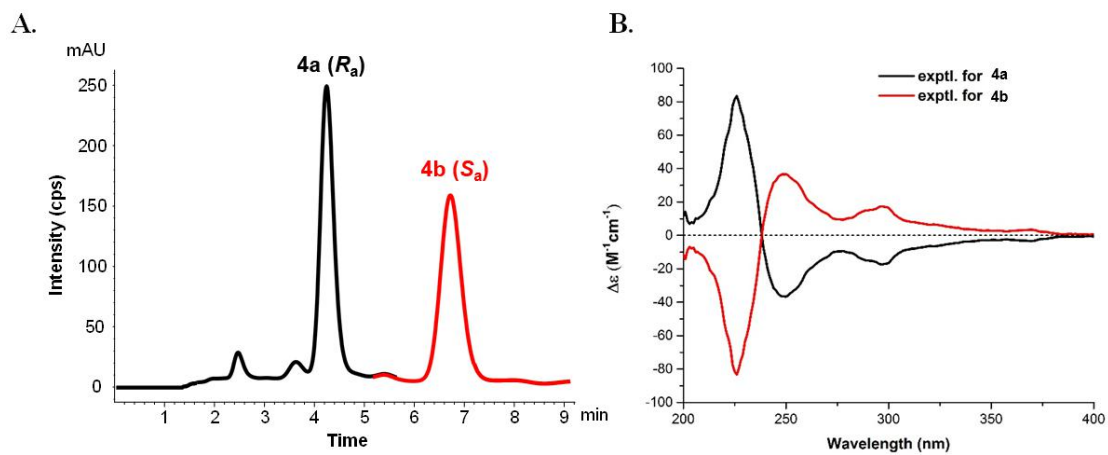

**Figure S25** The chiral HPLC separation (A) and experimental ECD data (B) of compounds **4a** and **4b**.

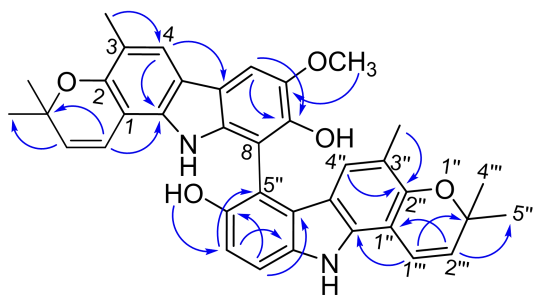

**Figure S26** Key HMBC correlations of compounds **4**.

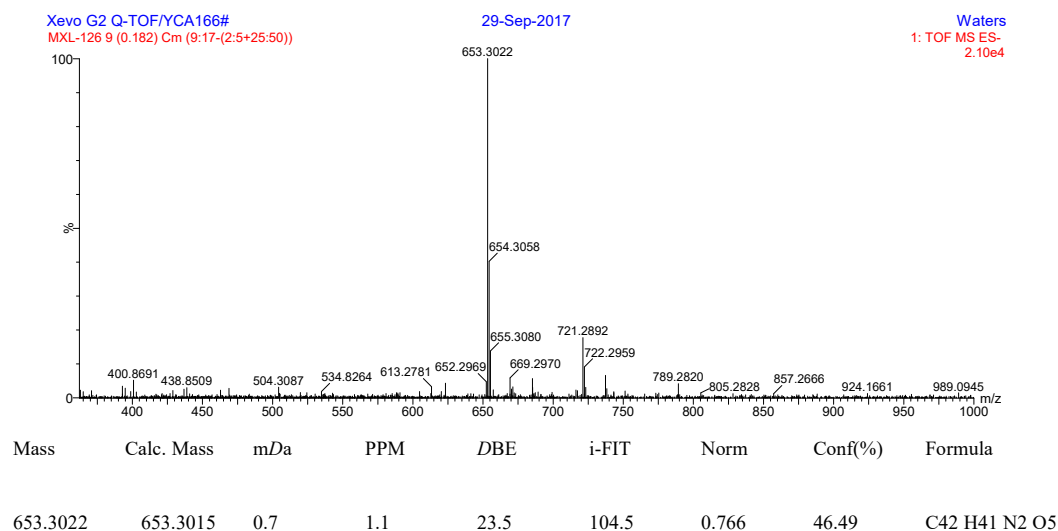

**Figure S27** HRESIMS for compound **5**.

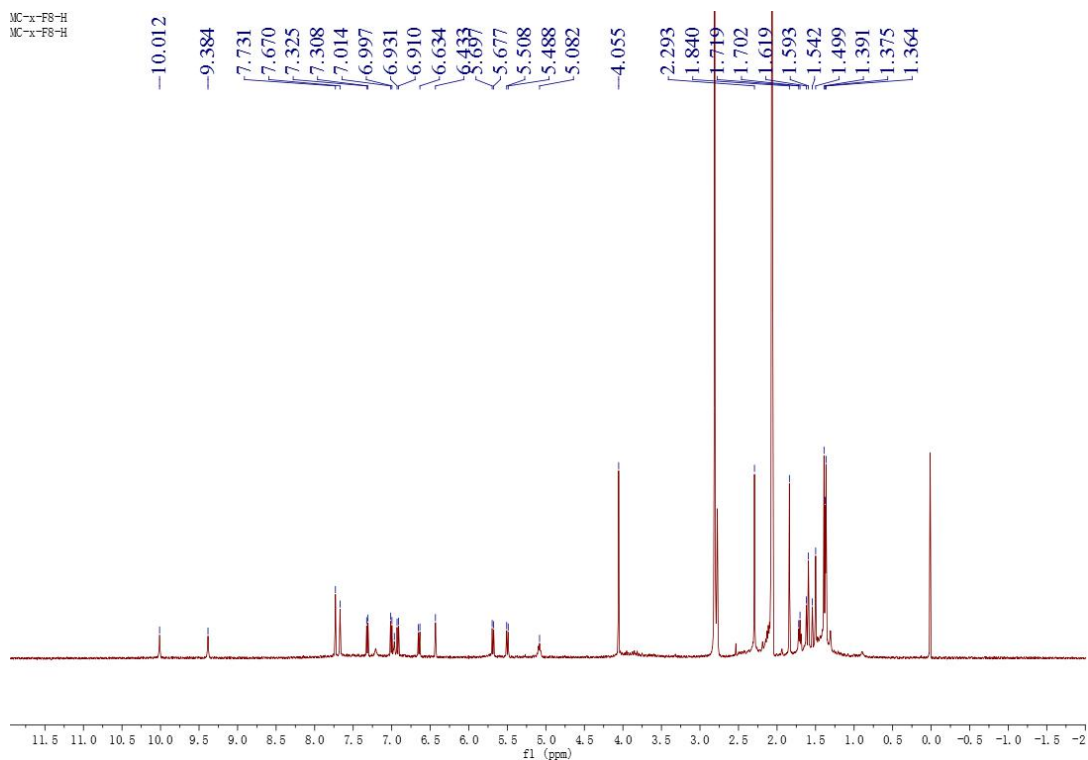

**Figure S28**  $^1\text{H}$  NMR spectrum (500 MHz, acetone- $d_6$ ) of compound **5**.

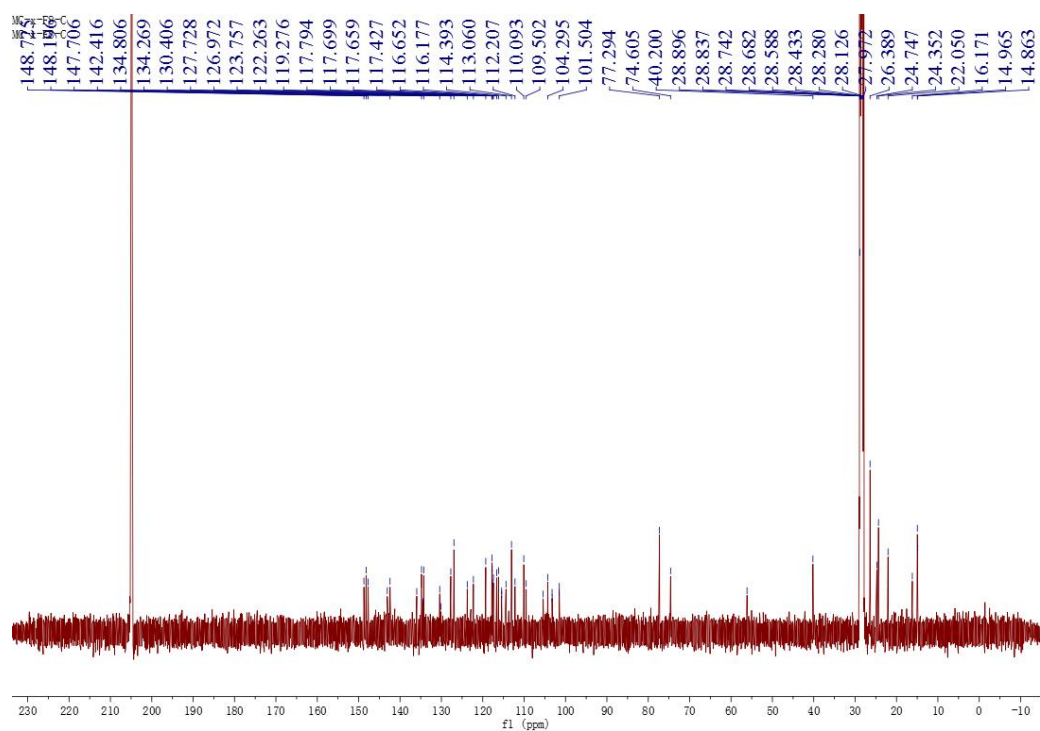

**Figure S29**  $^{13}\text{C}$  NMR spectrum (125 MHz, acetone- $d_6$ ) of compound **5**.

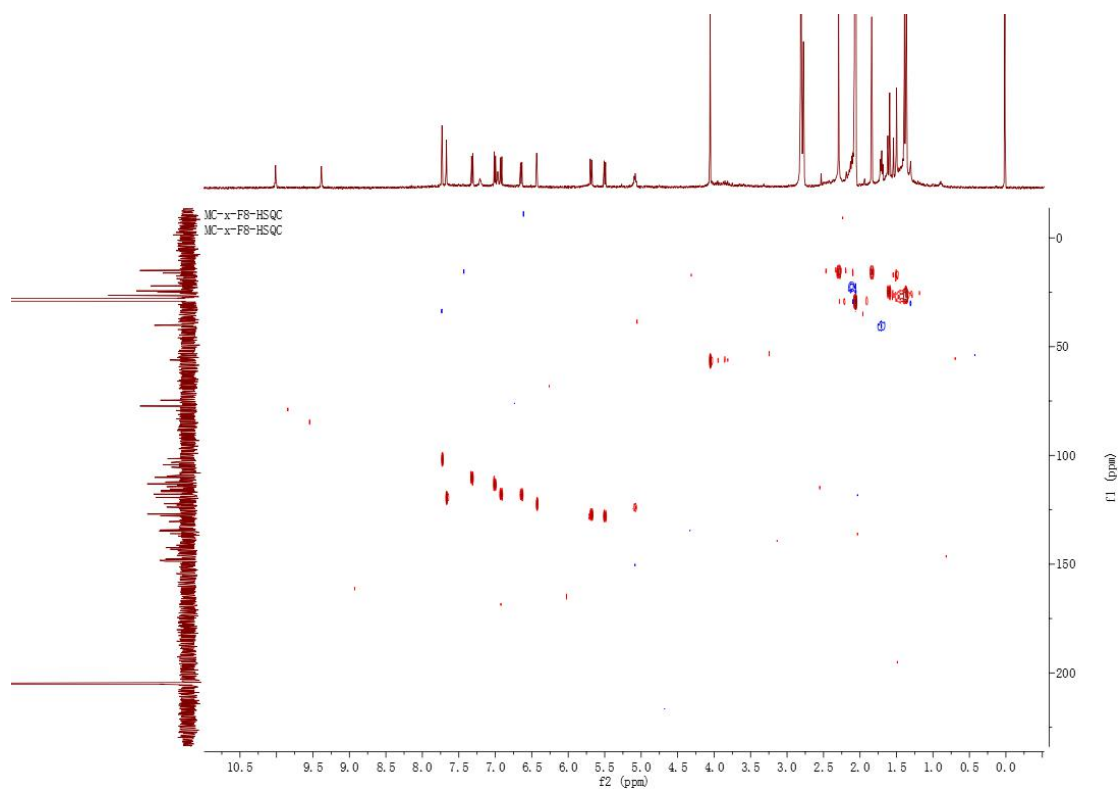

**Figure S30** HSQC spectrum of compound **5**.

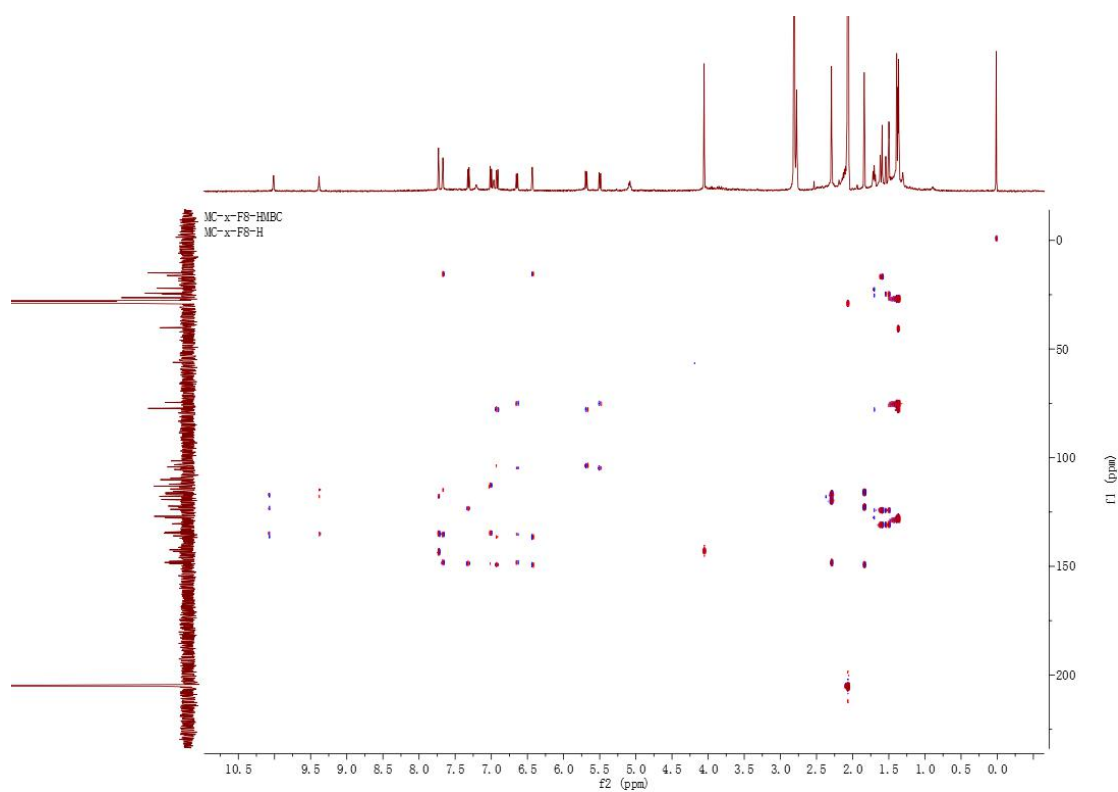

**Figure S31** HMBC spectrum of compound **5**.

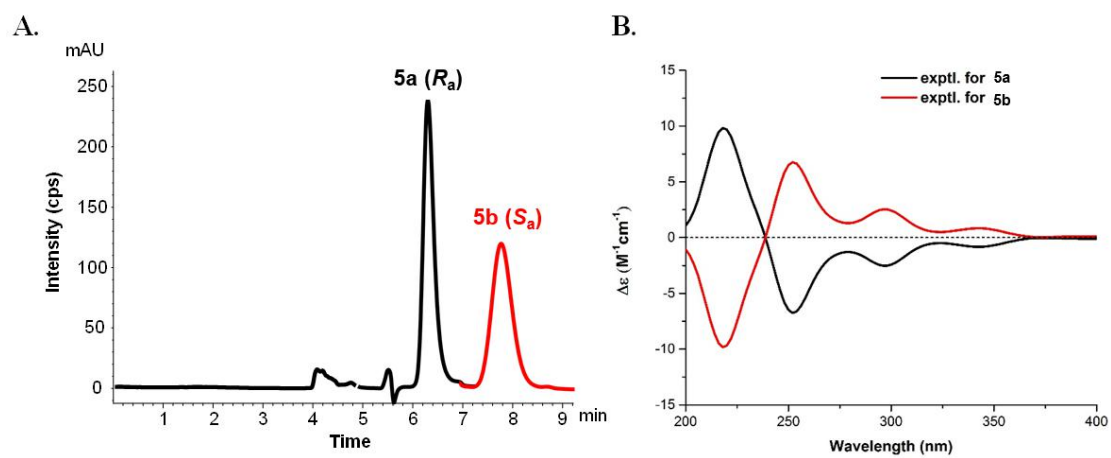

**Figure S32** The chiral HPLC separation (A) and experimental ECD data (B) of compounds **5a** and **5b**.

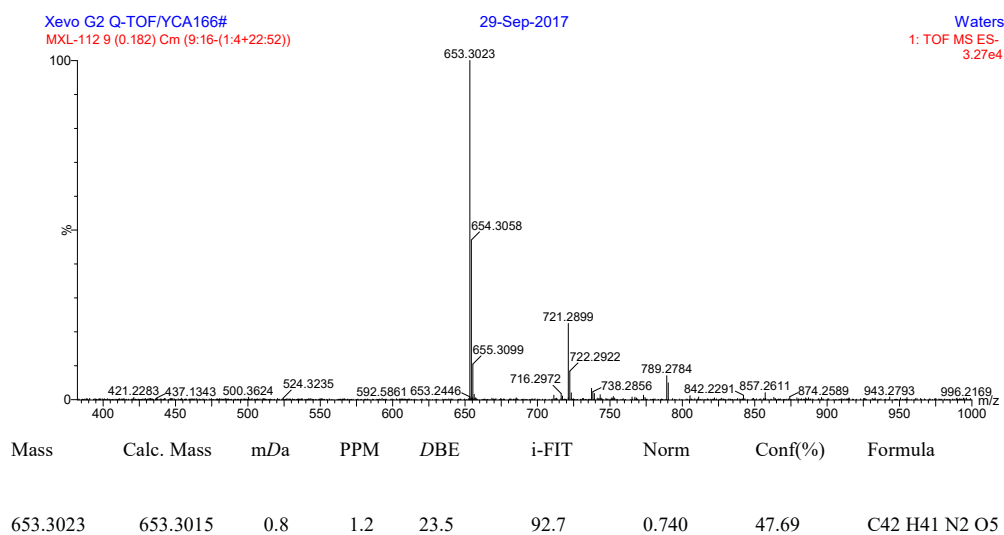

**Figure S33** HRESIMS for compound **6**.

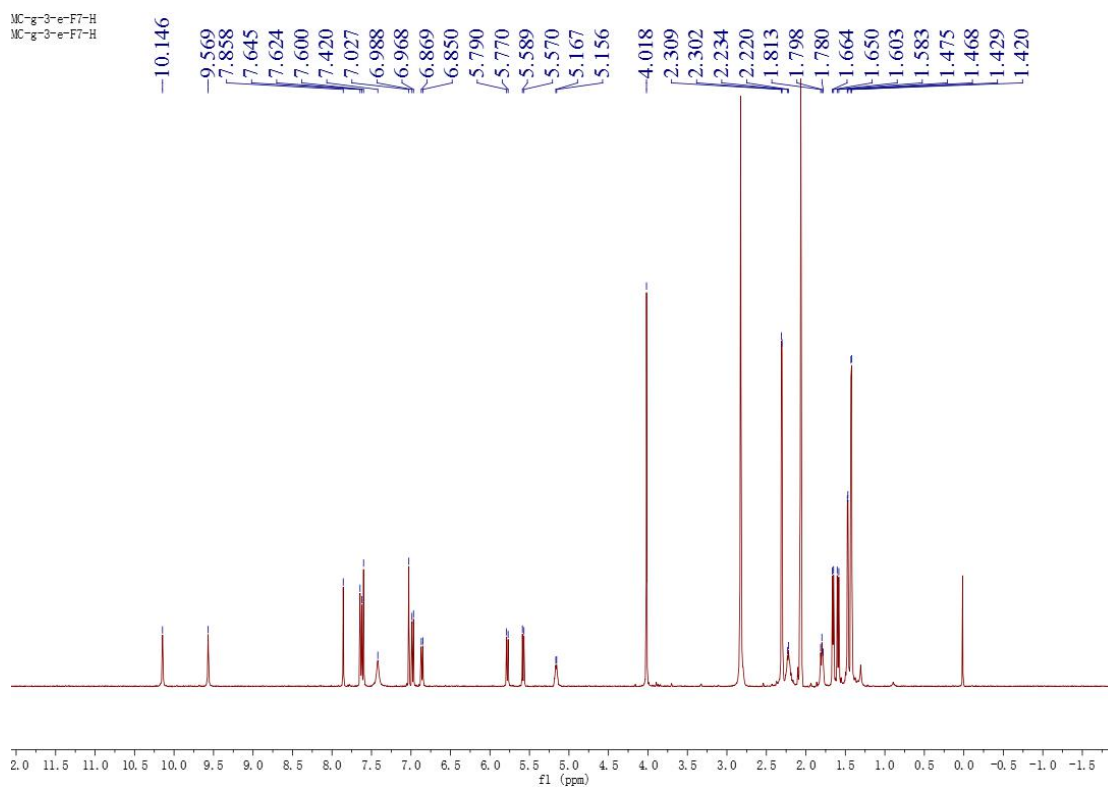

**Figure S34**  $^1\text{H}$  NMR spectrum (500 MHz, acetone- $d_6$ ) of compound **6**.

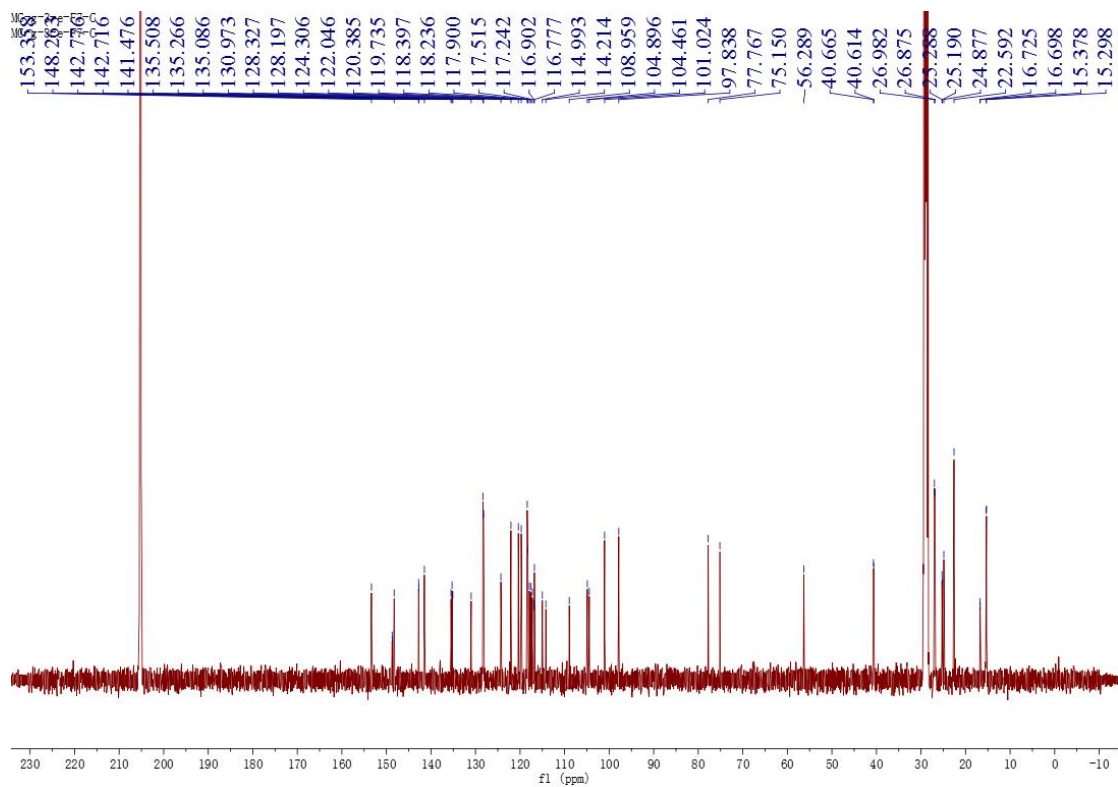

**Figure S35**  $^{13}\text{C}$  NMR spectrum (125 MHz, acetone- $d_6$ ) of compound **6**.

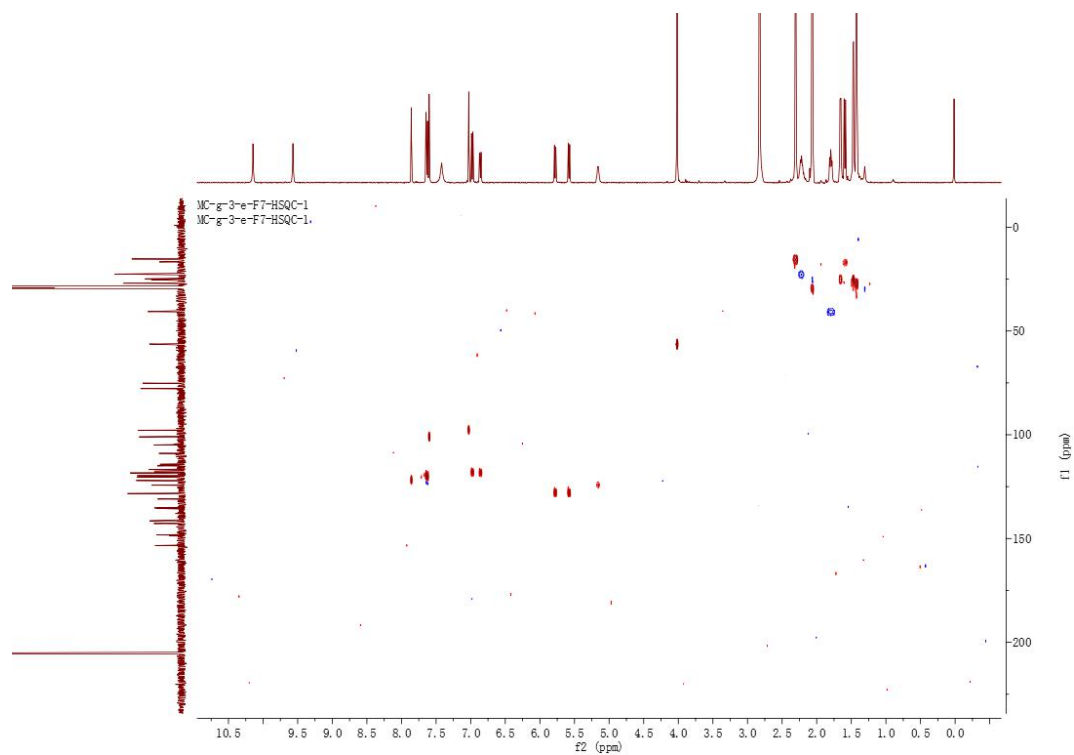

**Figure S36** HSQC spectrum of compound **6**.

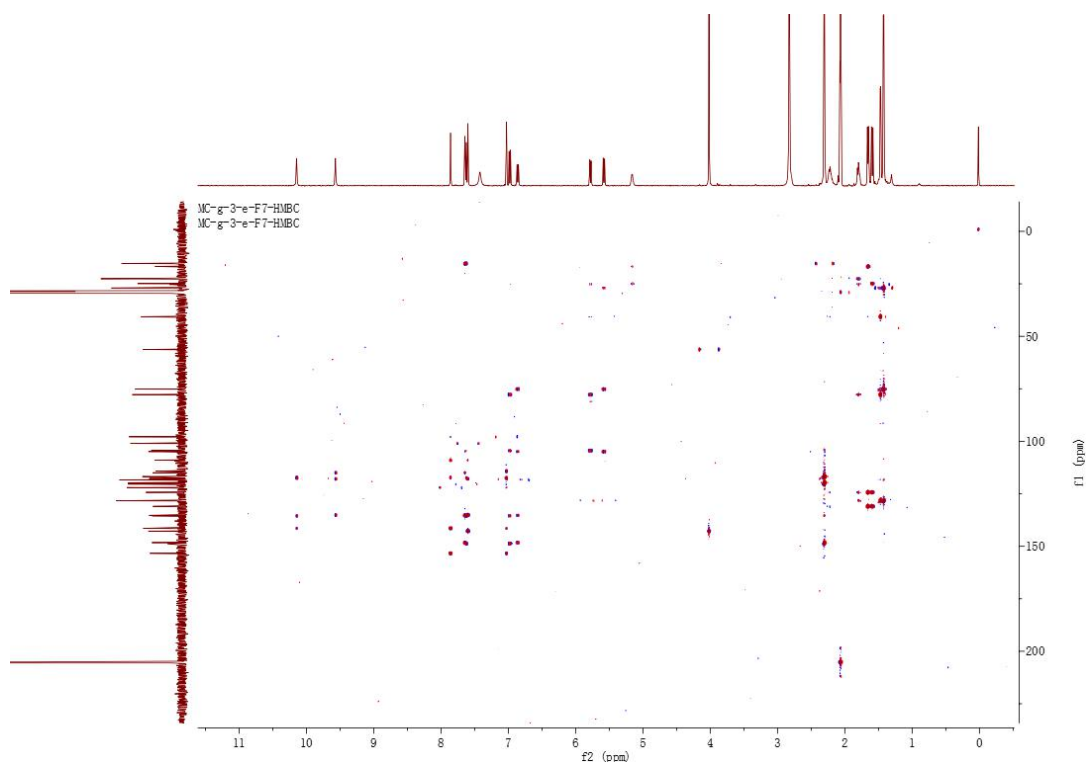

**Figure S37** HMBC spectrum of compound **6**.

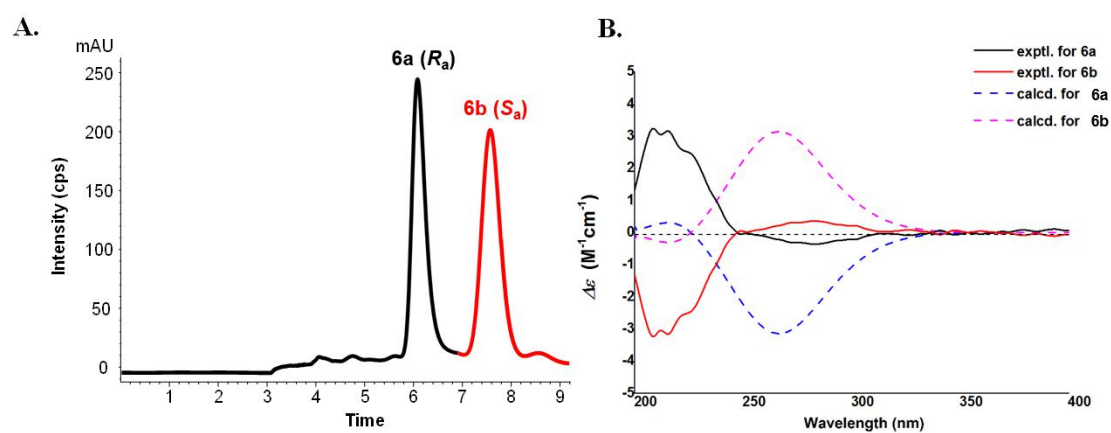

**Figure S38** The chiral HPLC separation (A) and experimental and calculated ECD data (B) of compounds **6a** and **6b**.

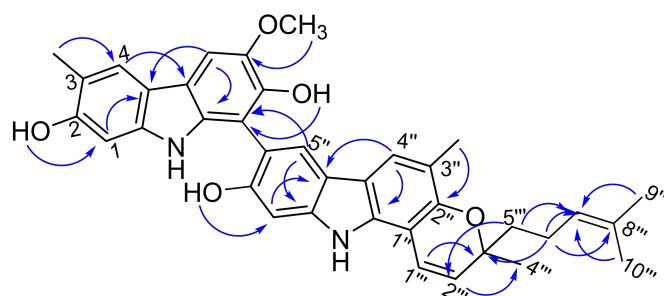

**Figure S39** Key HMBC correlations of compounds **6**.

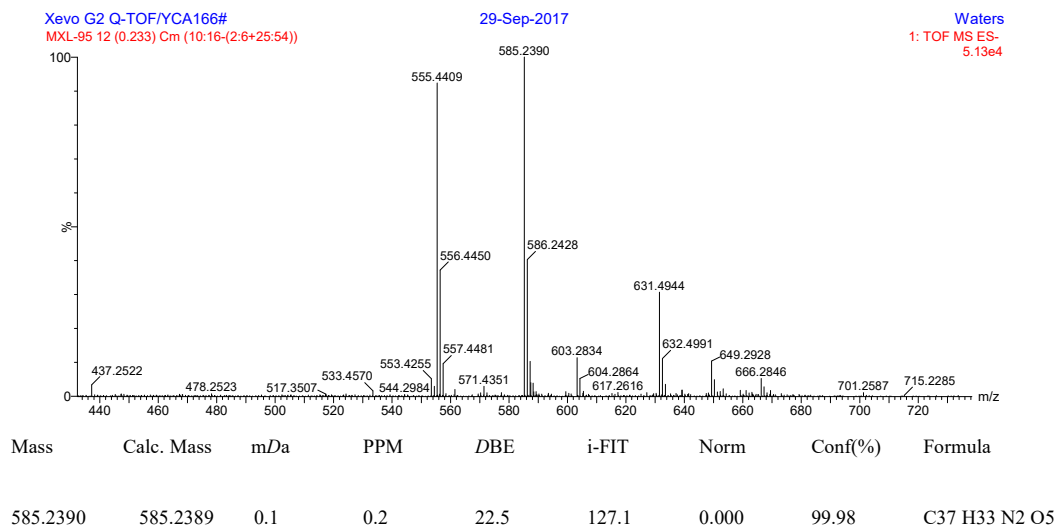

**Figure S40** HRESIMS for compound **7**.

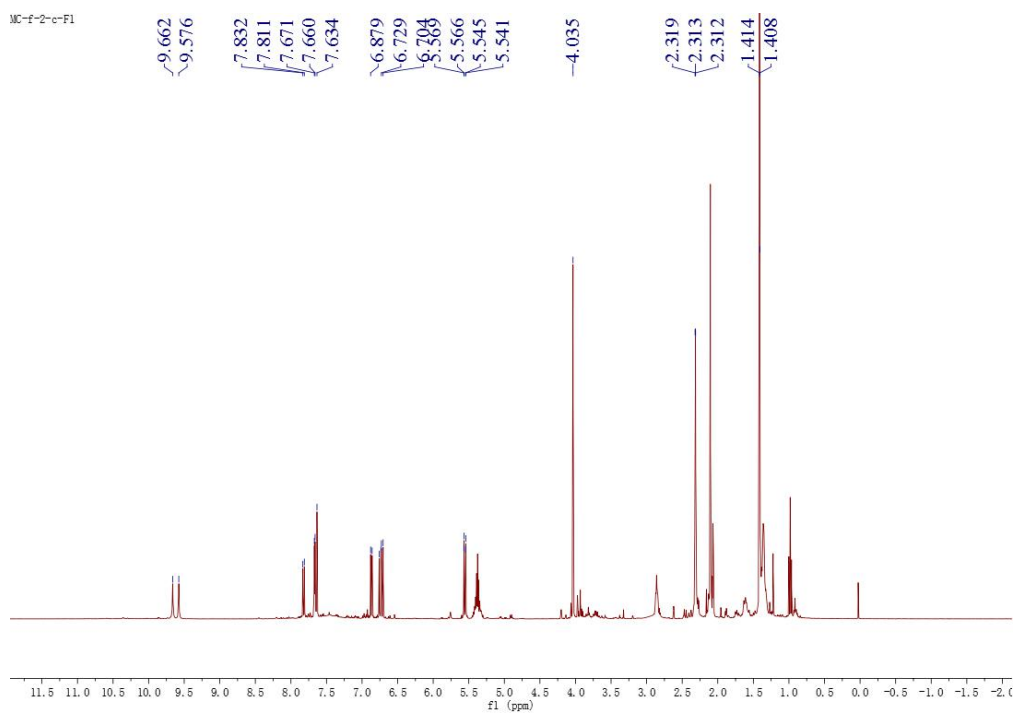

**Figure S41**  $^1\text{H}$  NMR spectrum (400 MHz, acetone- $d_6$ ) of compound **7**.



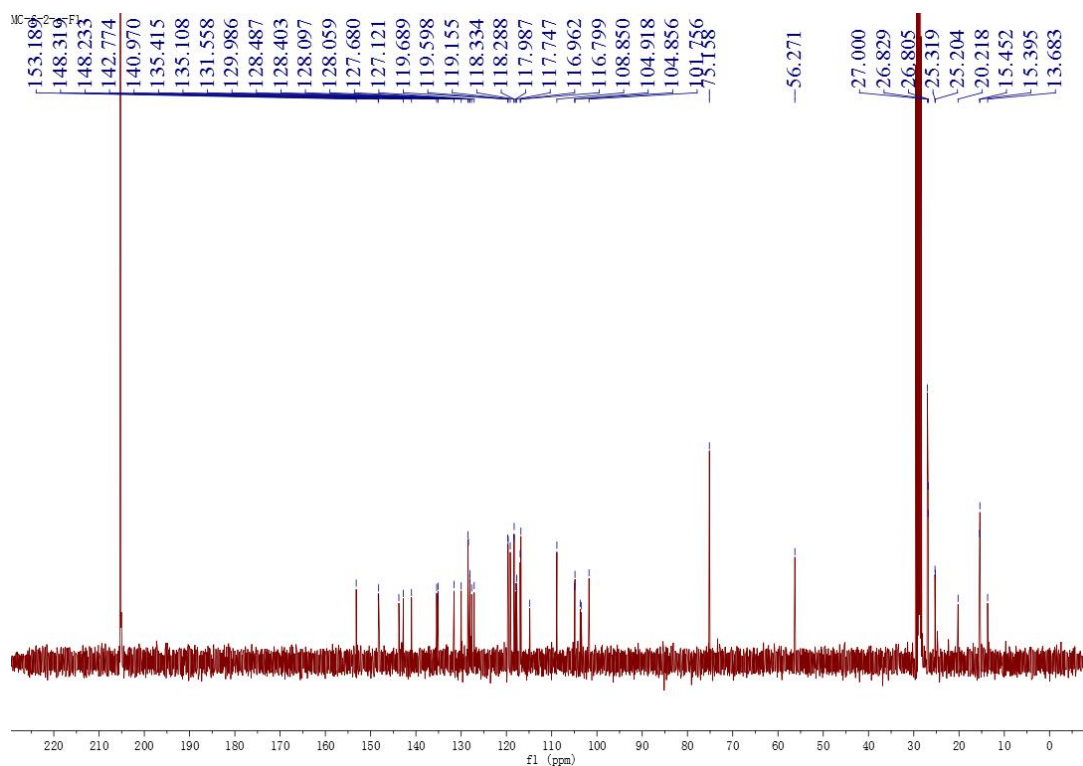

**Figure S42**  $^{13}\text{C}$  NMR spectrum (100 MHz, acetone- $d_6$ ) of compound 7.

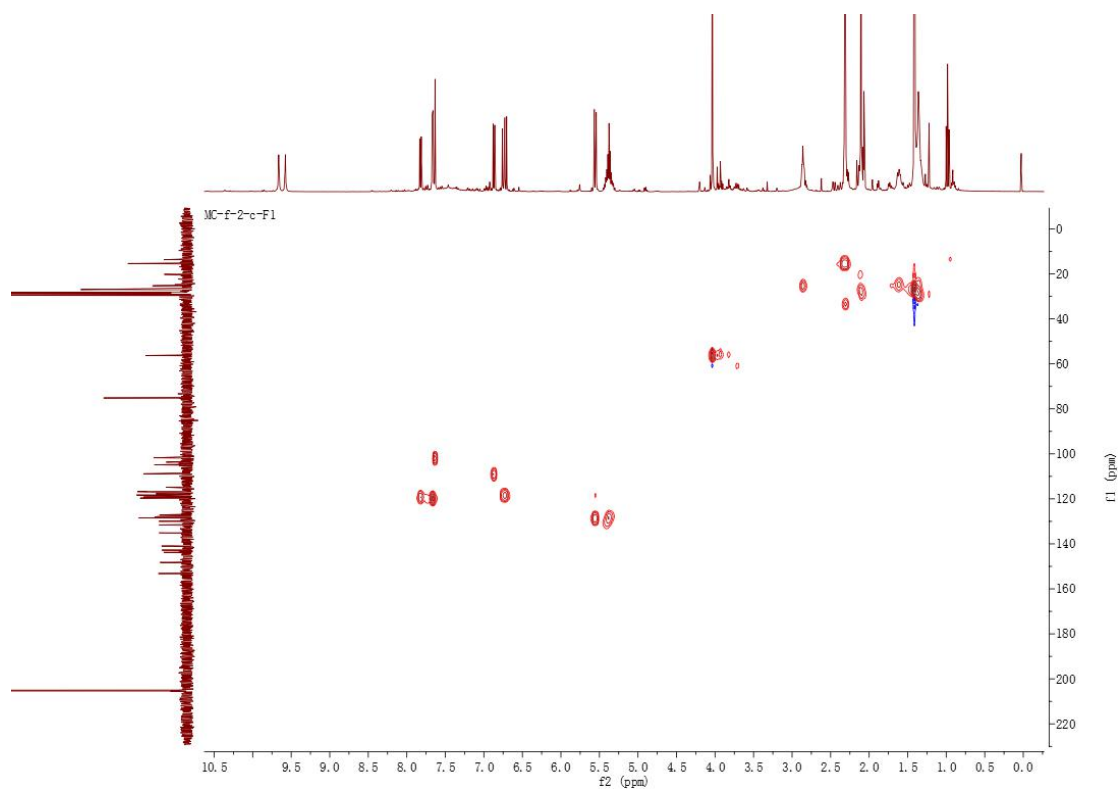

**Figure S43** HSQC spectrum of compound 7.

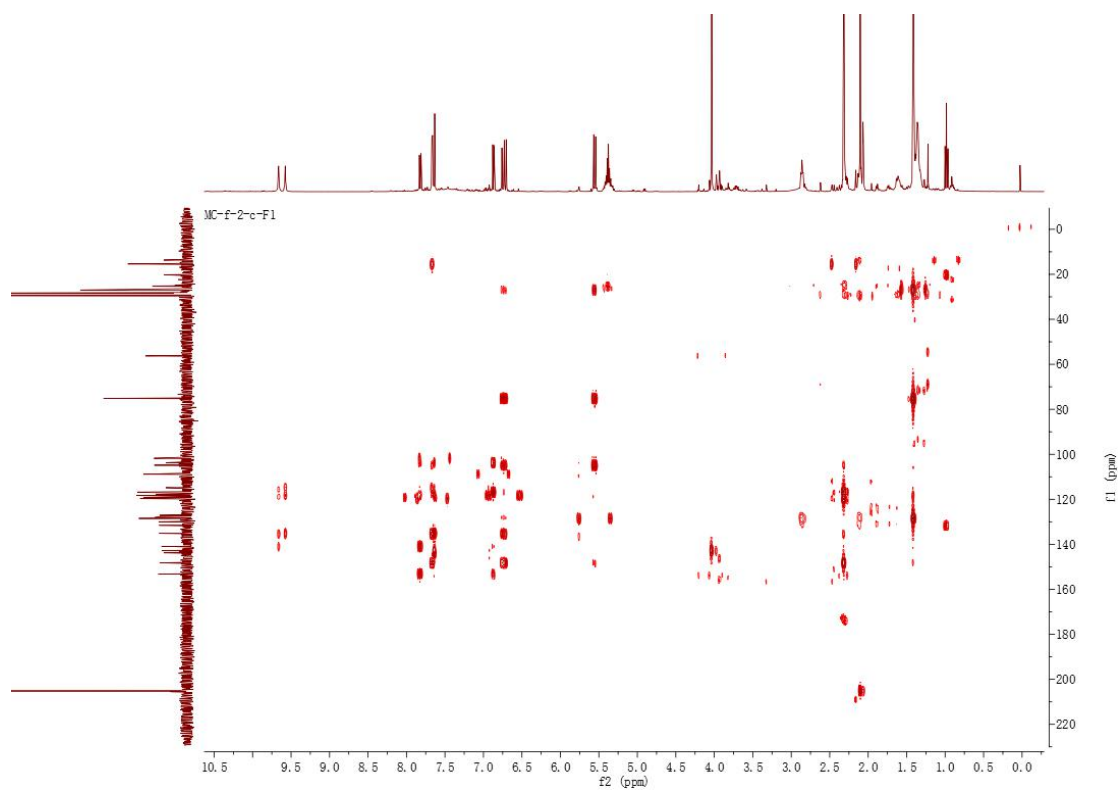

**Figure S44** HMBC spectrum of compound **7**.

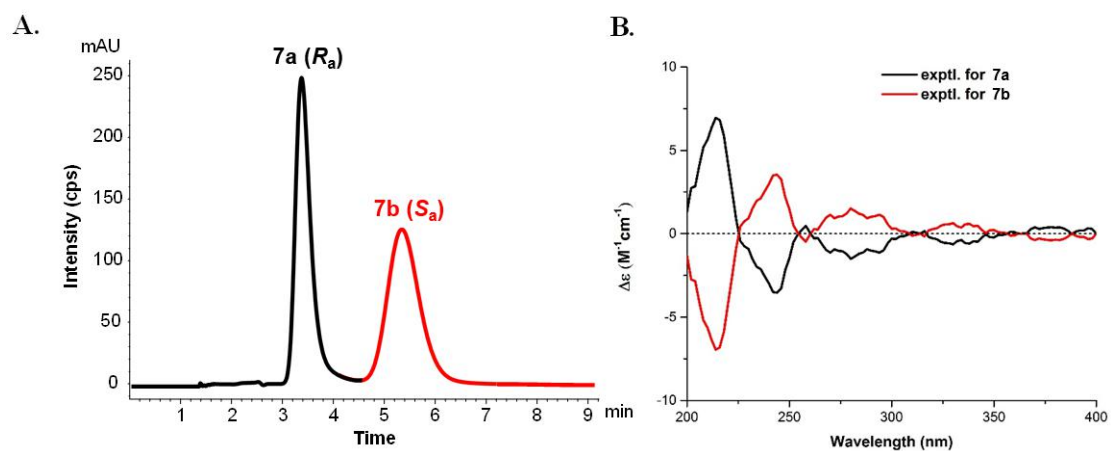

**Figure S45** The chiral HPLC separation (A) and experimental ECD data (B) of compounds **7a** and **7b**.

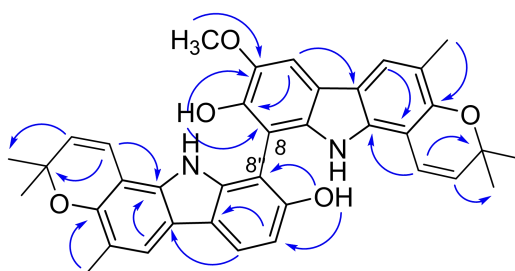

**Figure S46** Key HMBC correlations of compound **7**.

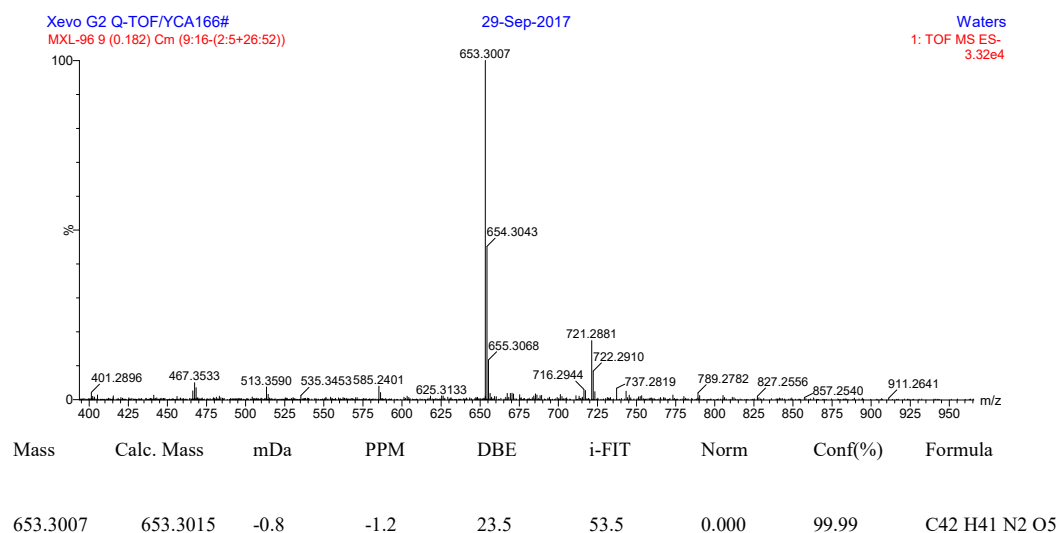

**Figure S47** HRESIMS for compound **8**.

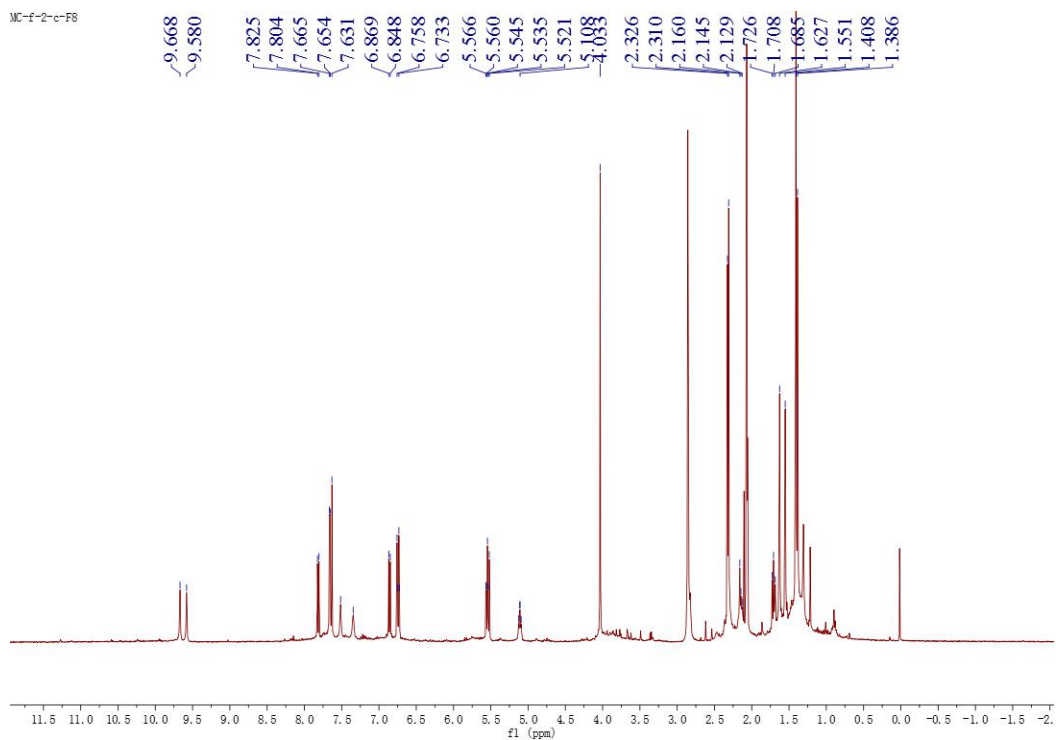

**Figure S48**  $^1\text{H}$  NMR spectrum (400 MHz, acetone- $d_6$ ) of compound **8**.

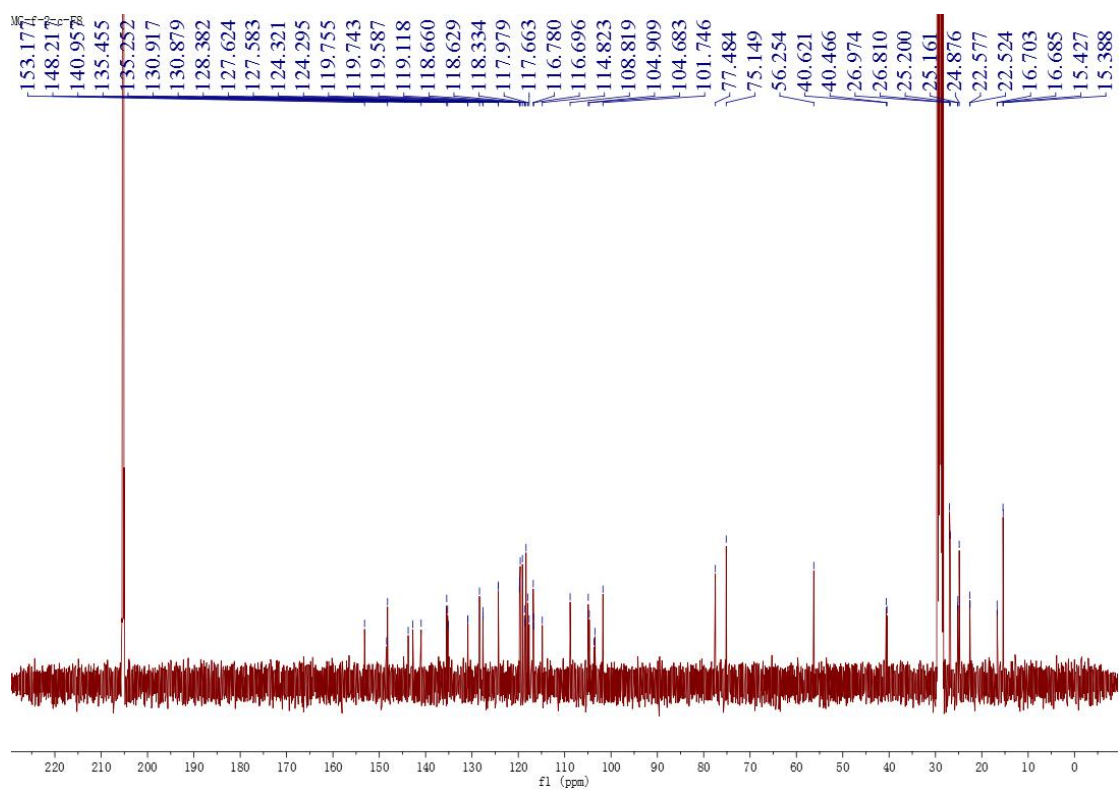

**Figure S49**  $^{13}\text{C}$  NMR spectrum (100 MHz, acetone- $d_6$ ) of compound **8**.

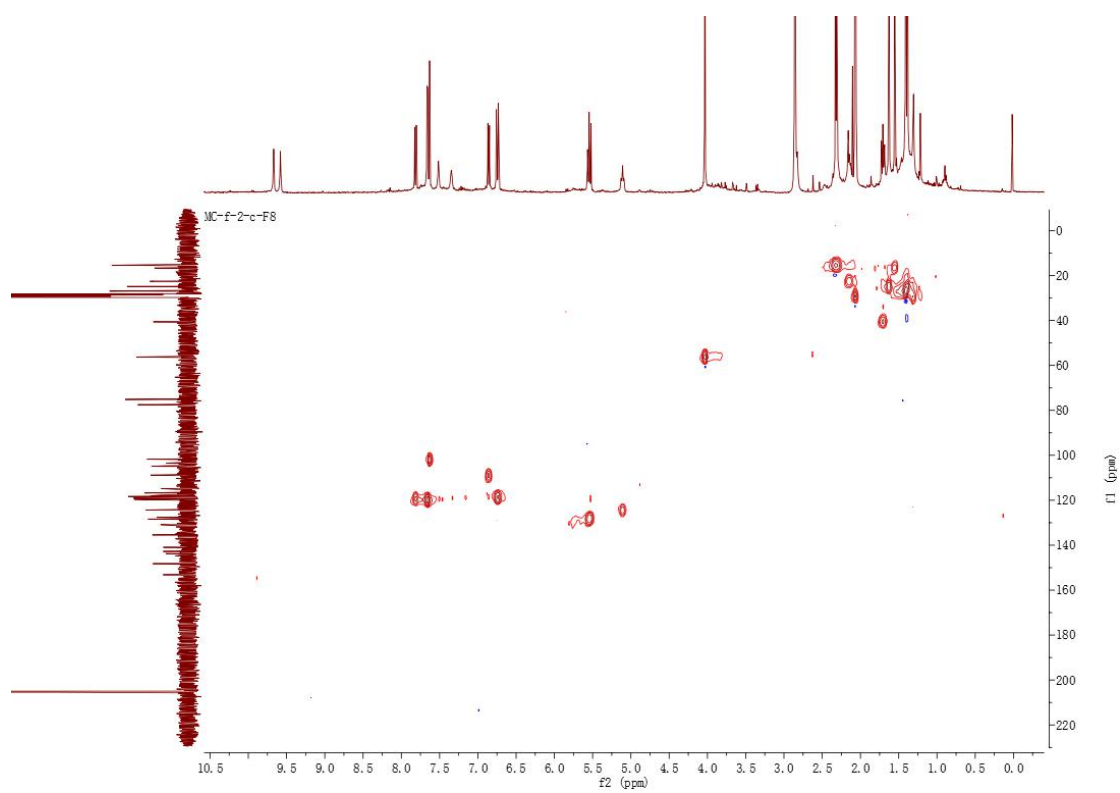

**Figure S50** HSQC spectrum of compound **8**.

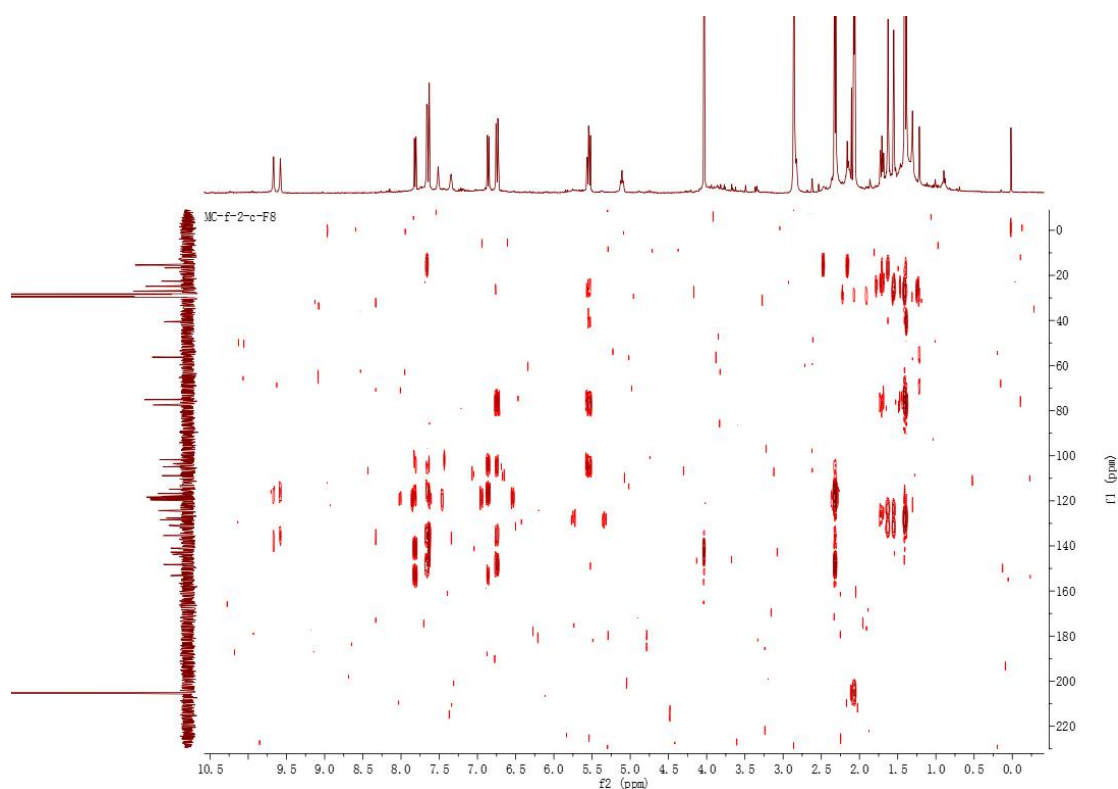

**Figure S51** HMBC spectrum of compound **8**.

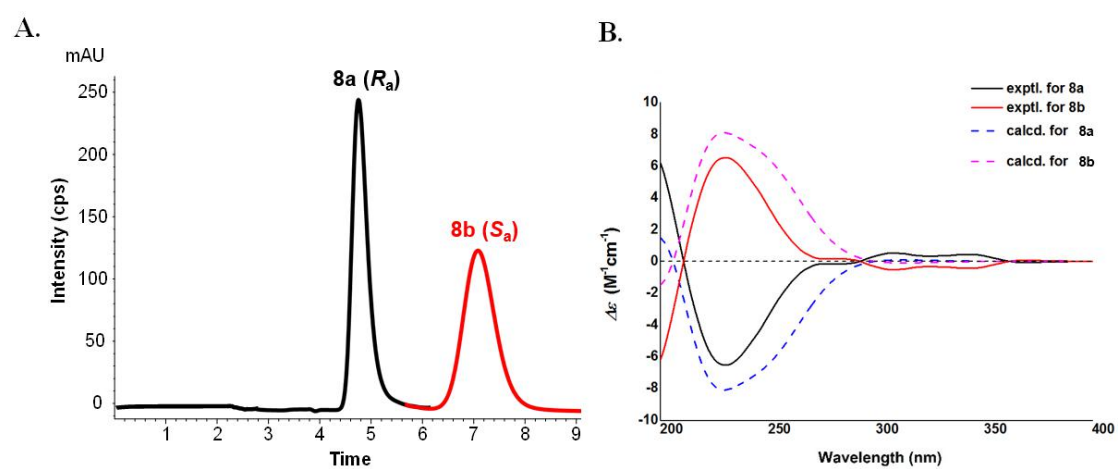

**Figure S52** The chiral HPLC separation (A) and experimental and calculated ECD data (B) of compounds **8a** and **8b**.

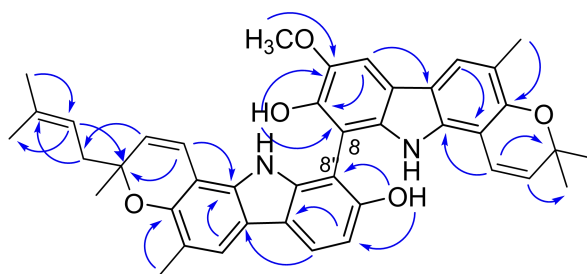

**Figure S53** Key HMBC correlations of compounds **8**.

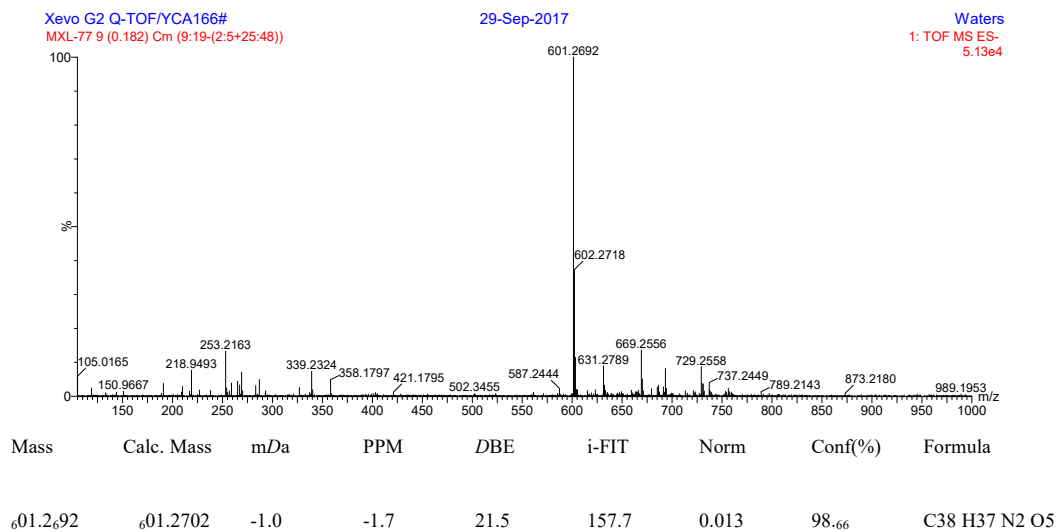

**Figure S54** HRESIMS for compound **9**.

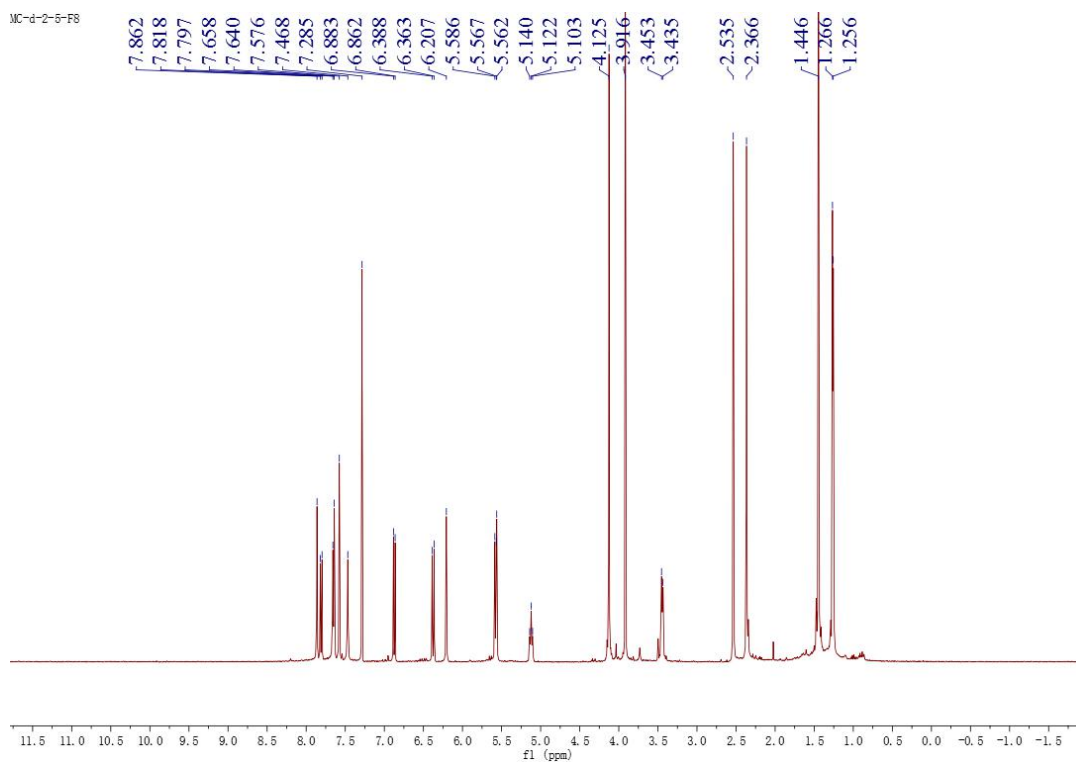

**Figure S55**  $^1\text{H}$  NMR spectrum (400 MHz,  $\text{CDCl}_3$ ) of compound **9**.

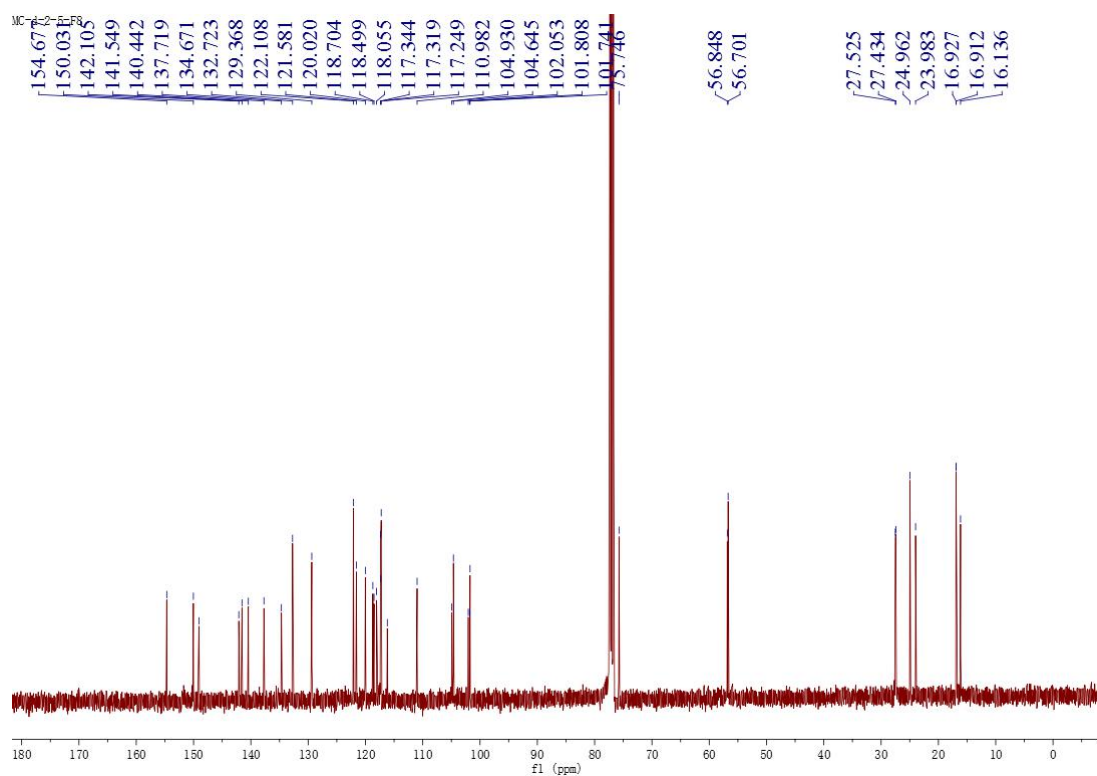

**Figure S56**  $^{13}\text{C}$  NMR spectrum (100 MHz,  $\text{CDCl}_3$ ) of compound **9**.

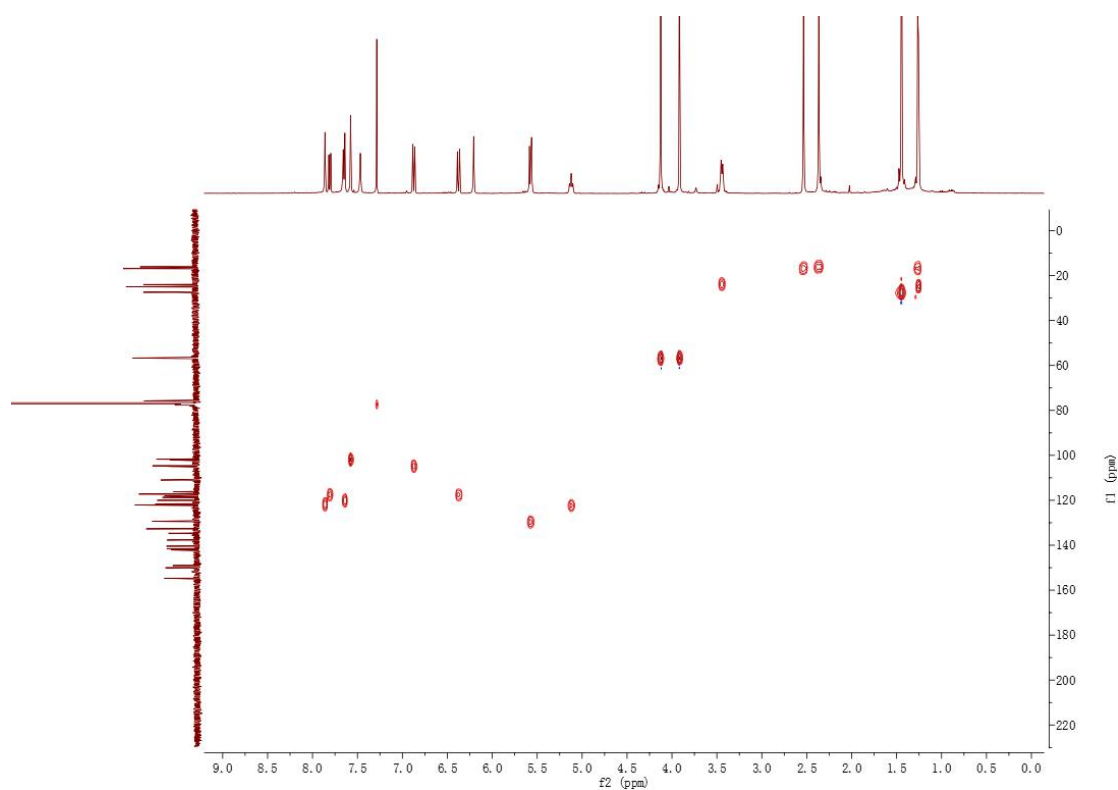

**Figure S57** HSQC spectrum of compound **9**.

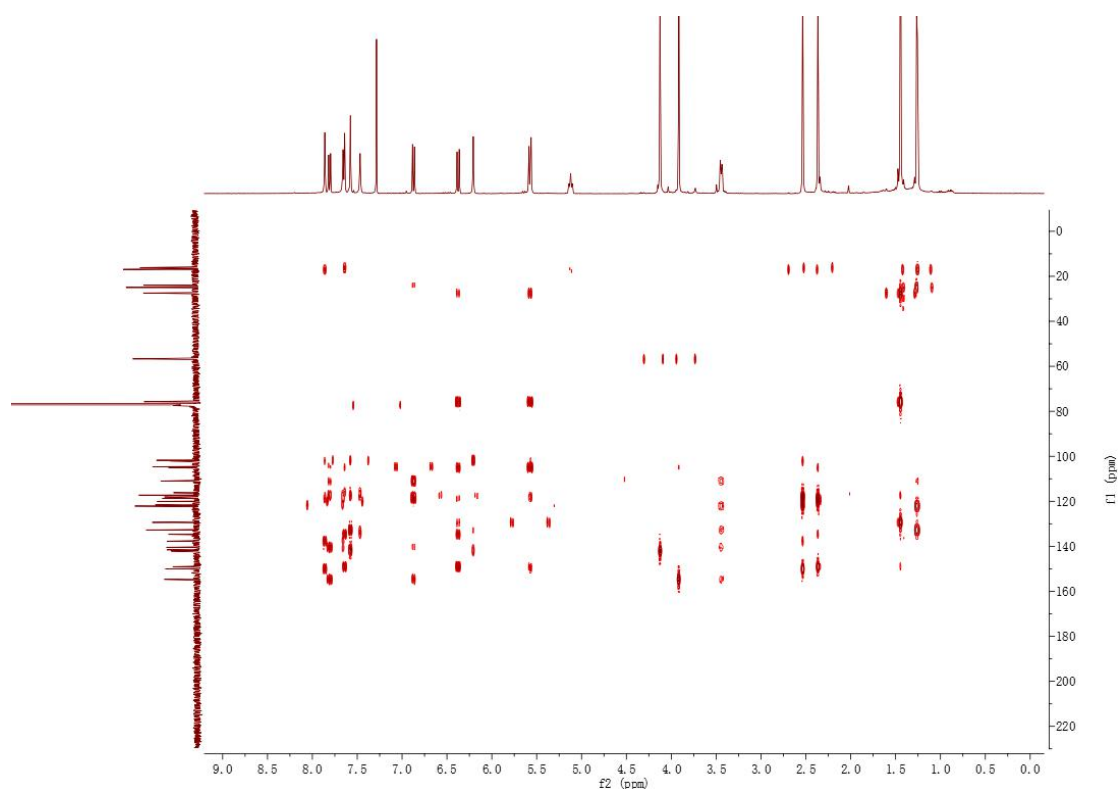

**Figure S58** HMBC spectrum of compound **9**.

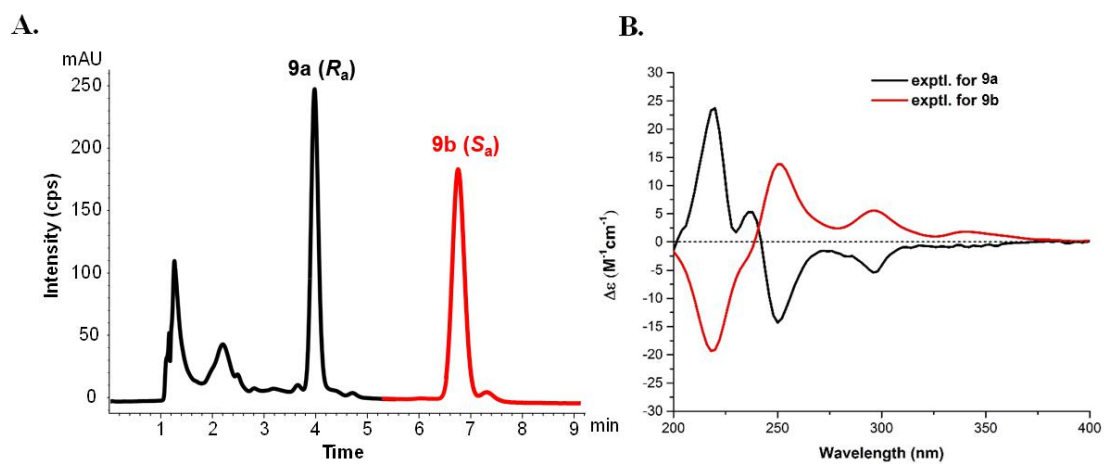

**Figure S59** The chiral HPLC separation (A) and experimental ECD data (B) of compounds **9a** and **9b**.

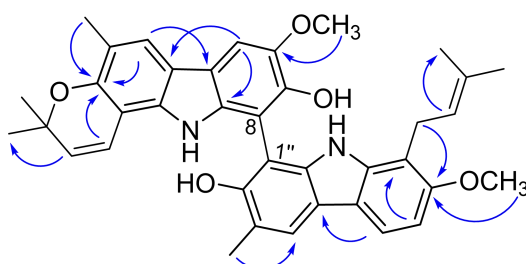

**Figure S60** Key HMBC correlations of compounds **9**.



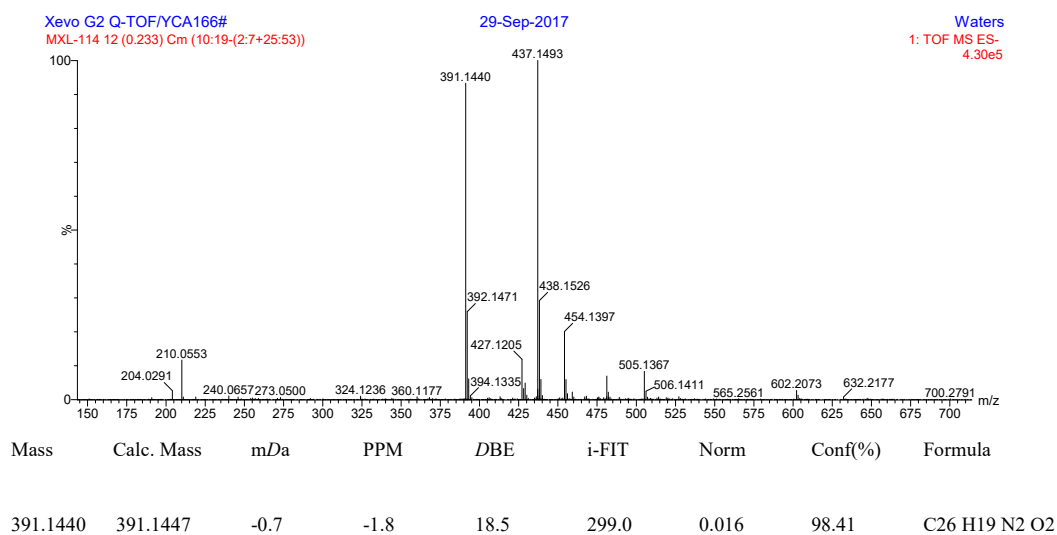

**Figure S61** HRESIMS for compound **10**.

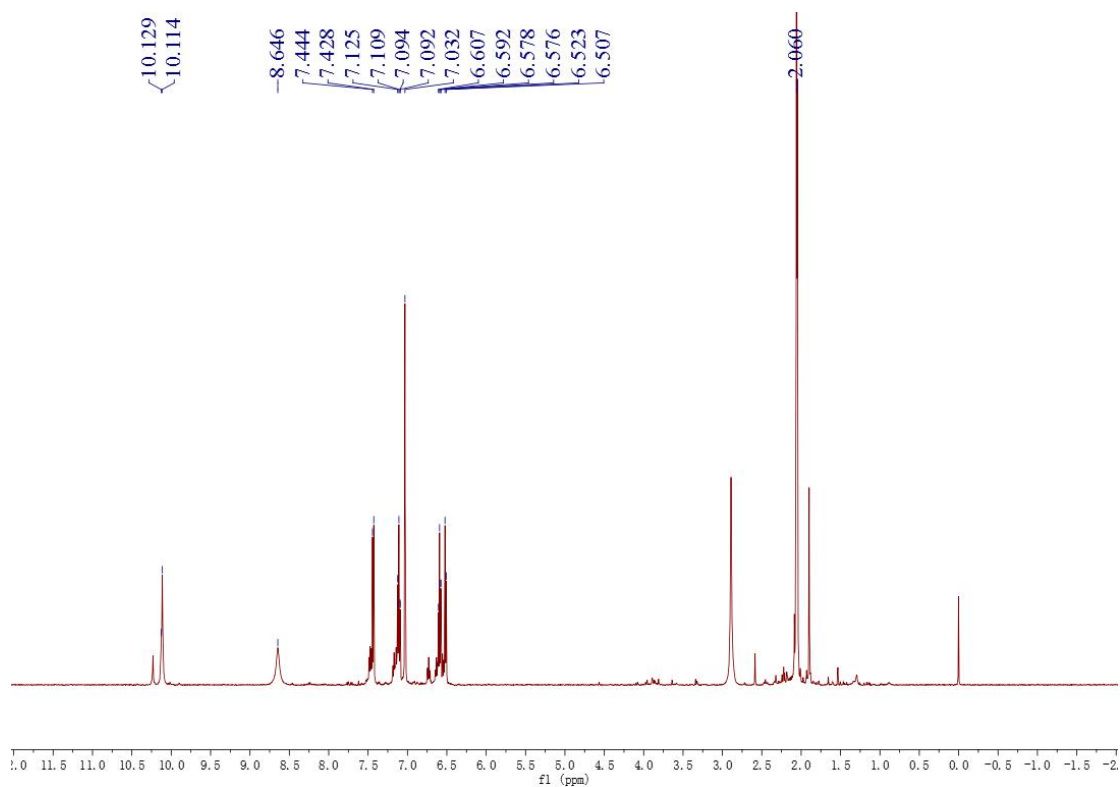

**Figure S62** <sup>1</sup>H NMR spectrum (500 MHz, acetone-*d*<sub>6</sub>) of compound **10**.

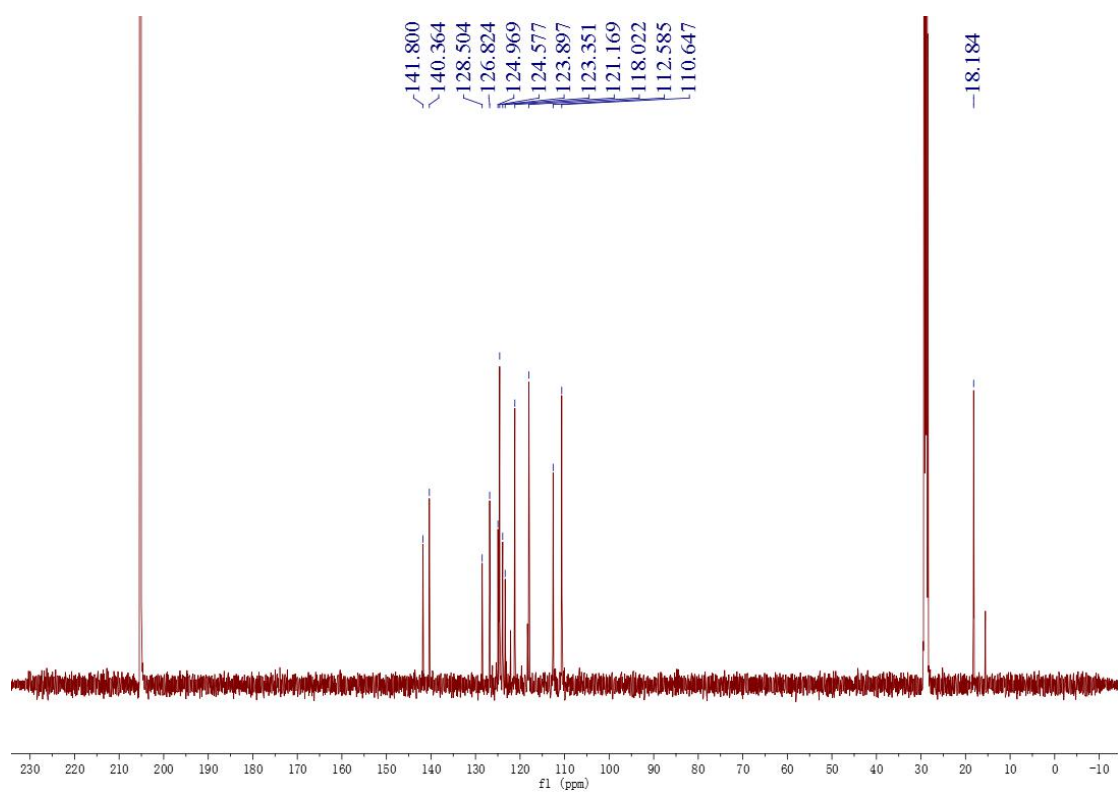

**Figure S63**  $^{13}\text{C}$  NMR spectrum (125 MHz, acetone- $d_6$ ) of compound **10**.

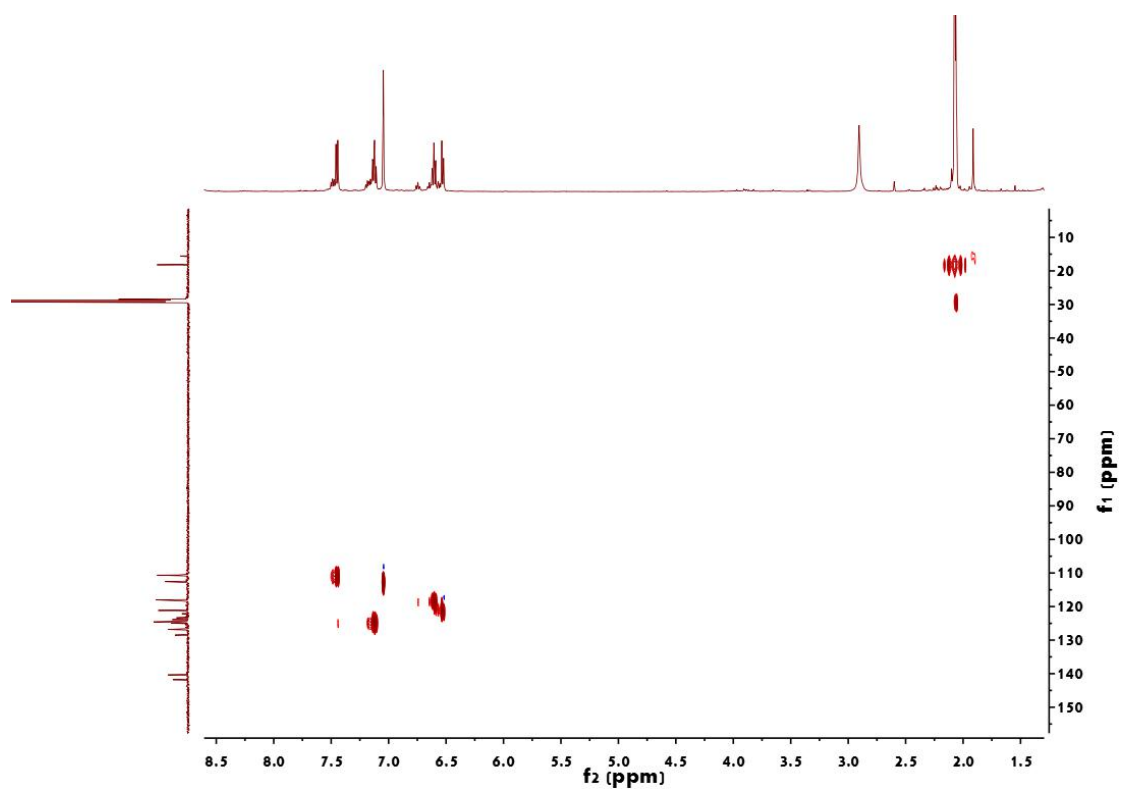

**Figure S64** HSQC spectrum of compound **10**.

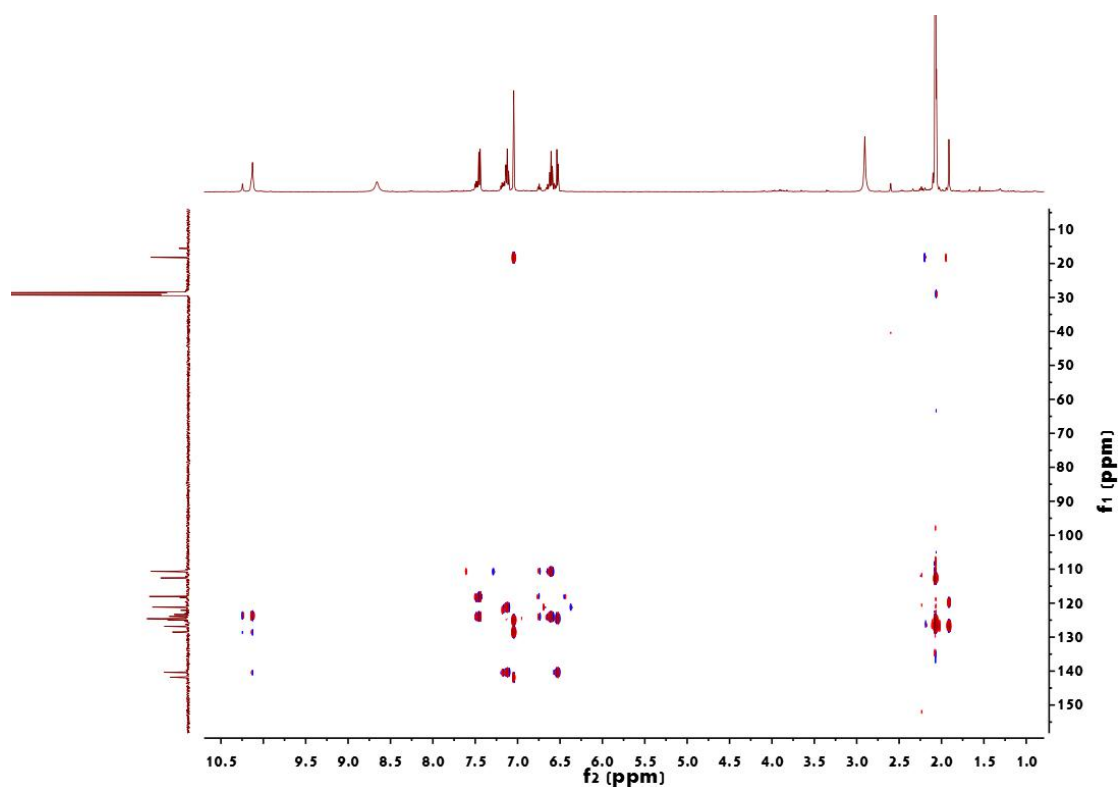

**Figure S65** HMBC spectrum of compound **10**.

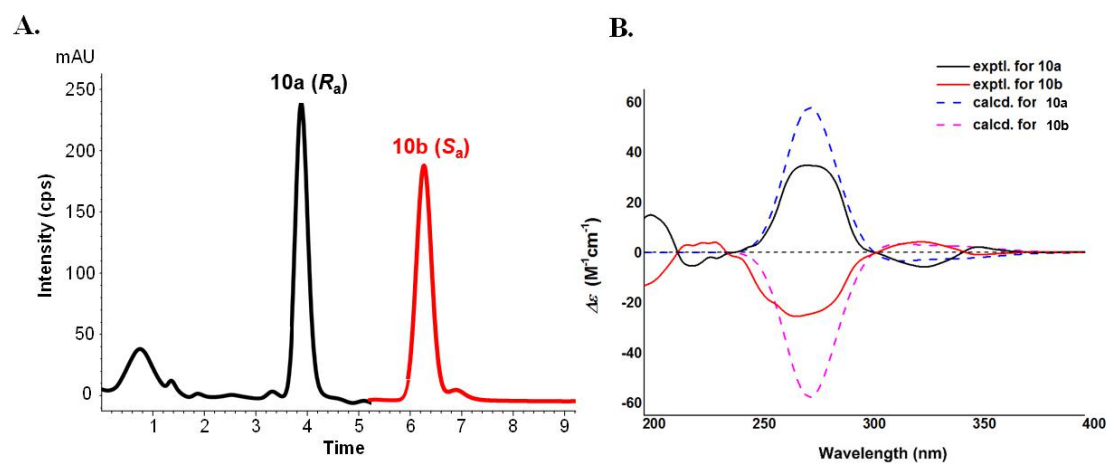

**Figure S66** The chiral HPLC separation (A) and experimental and calculated ECD data (B) of compounds **10a** and **10b**.

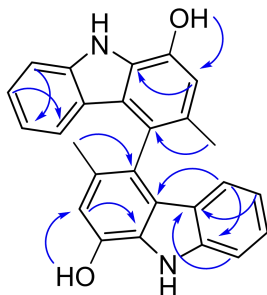

**Figure S67** Key HMBC correlations of compounds **10**.

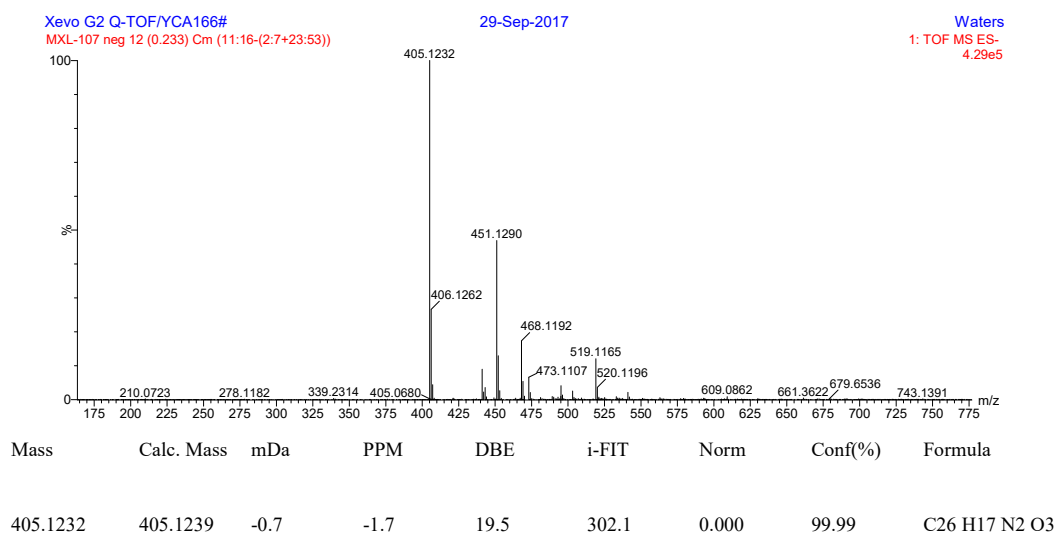

**Figure S68** HRESIMS for compound **11**.

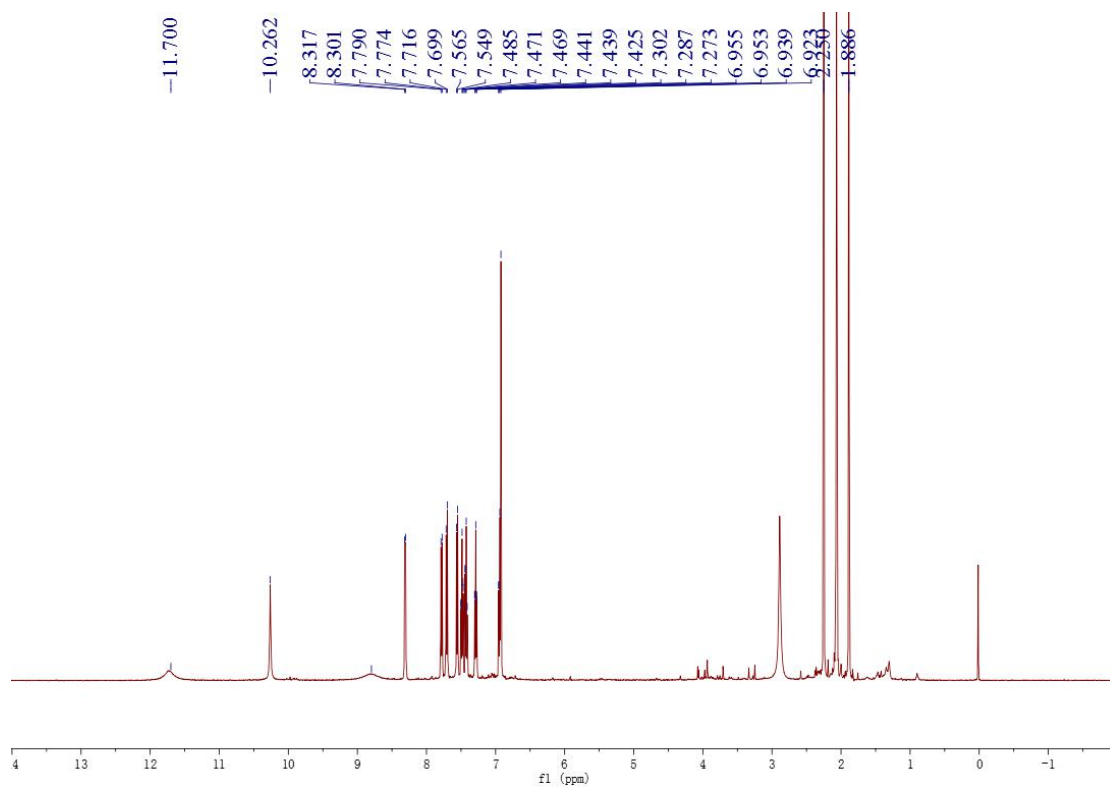

**Figure S69** <sup>1</sup>H NMR spectrum (500 MHz, acetone-*d*<sub>6</sub>) of compound **11**.

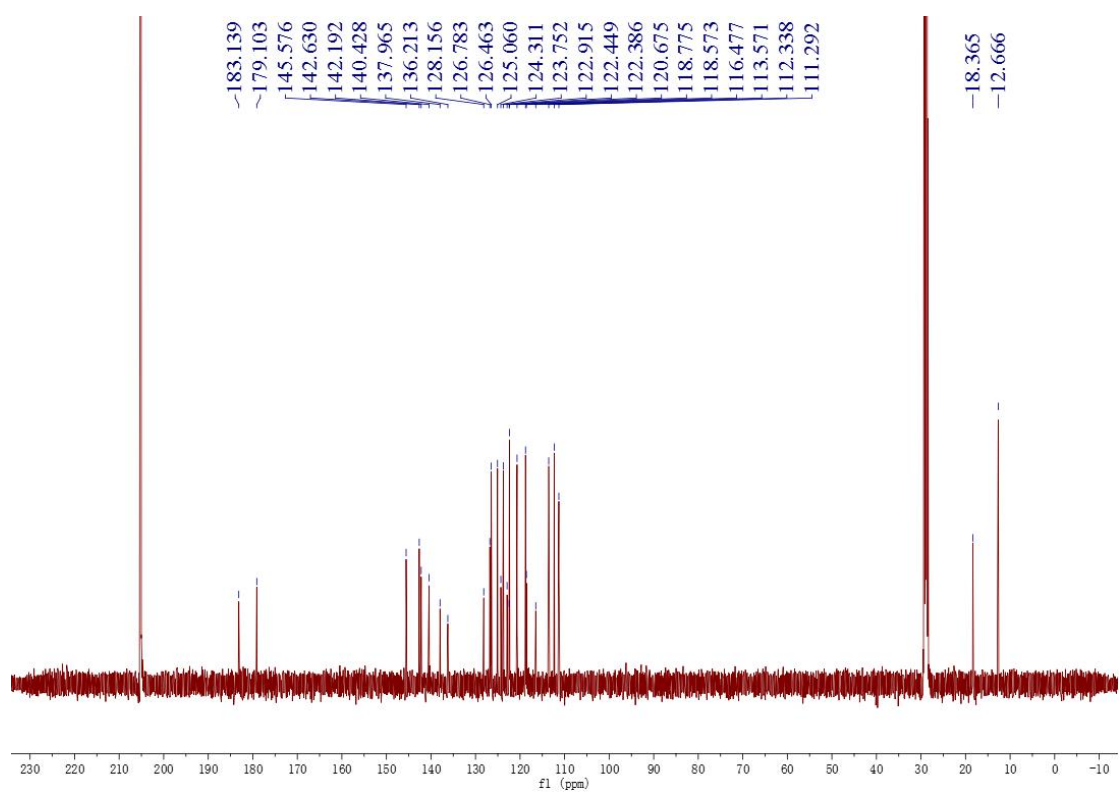

**Figure S70**  $^{13}\text{C}$  NMR spectrum (125 MHz, acetone- $d_6$ ) of compound **11**.

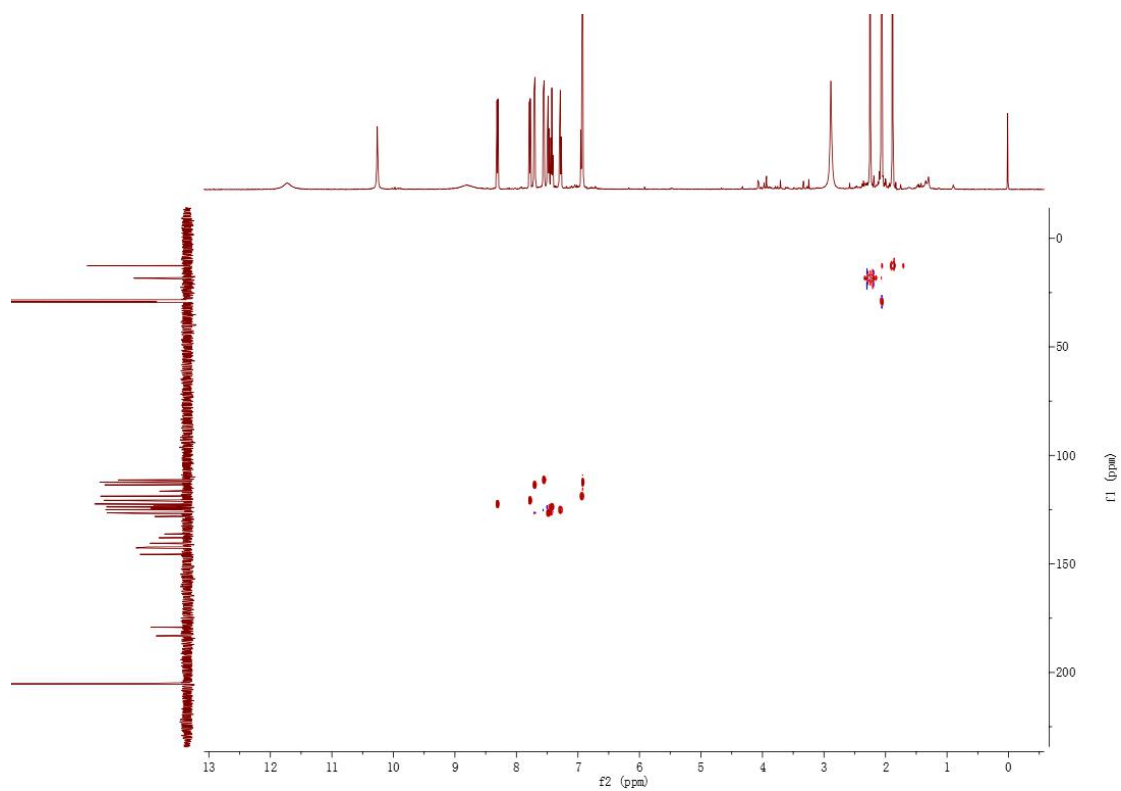

**Figure S71** HSQC spectrum of compound **11**.

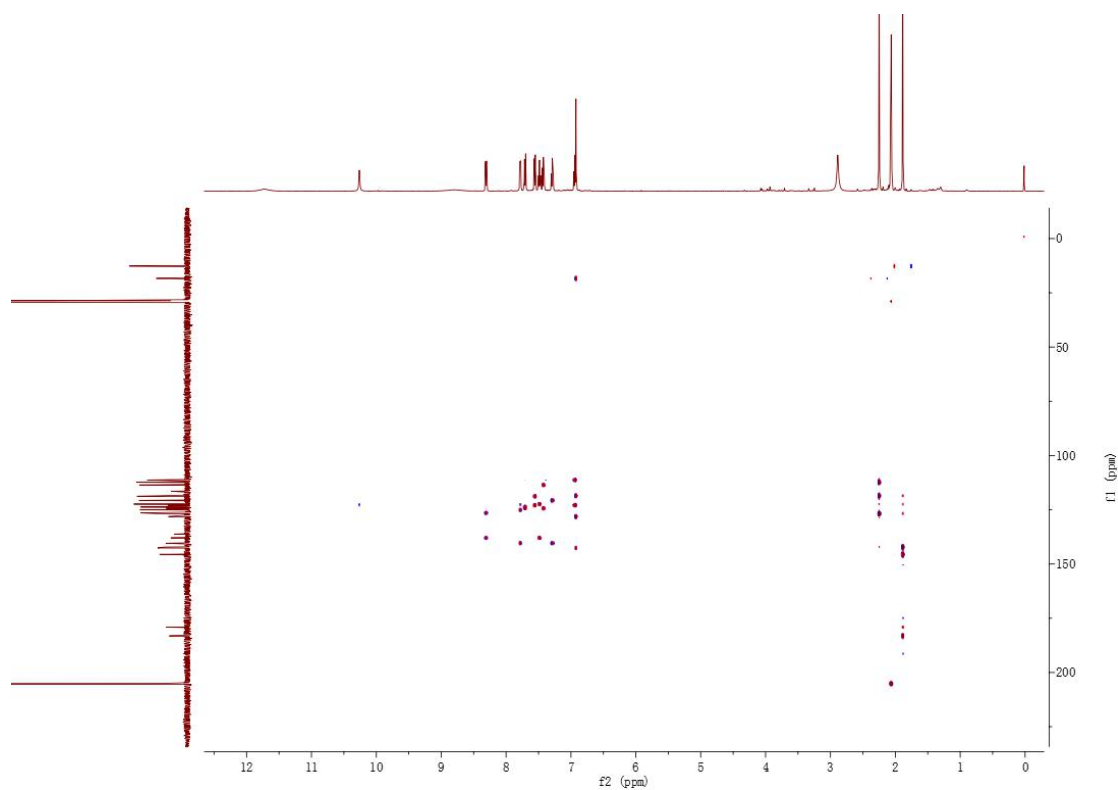

**Figure S72** HMBC spectrum of compound **11**.

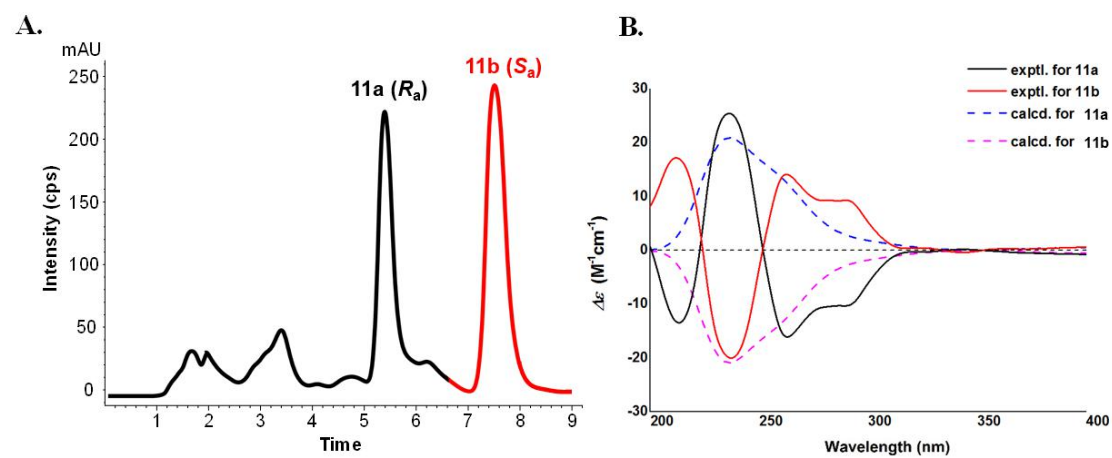

**Figure S73** The chiral HPLC separation (A) and experimental and calculated ECD data (B) of compounds **11a** and **11b**.

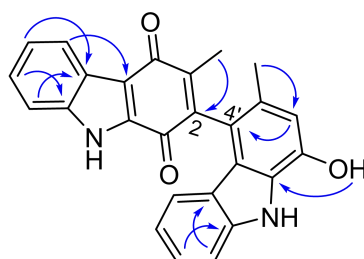

**Figure S74** Key HMBC correlations of compounds **11**.

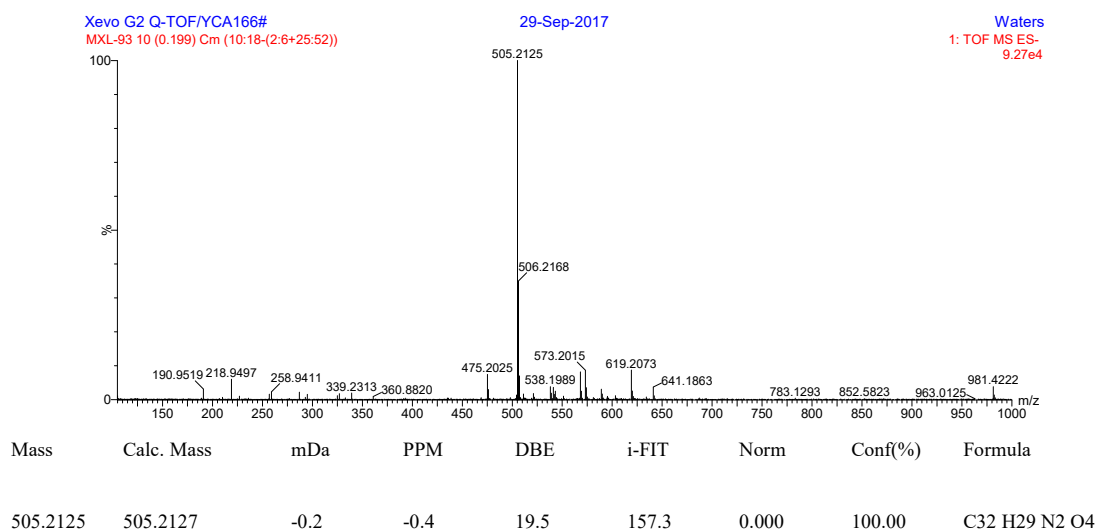

**Figure S75** HRESIMS for compound **12**.

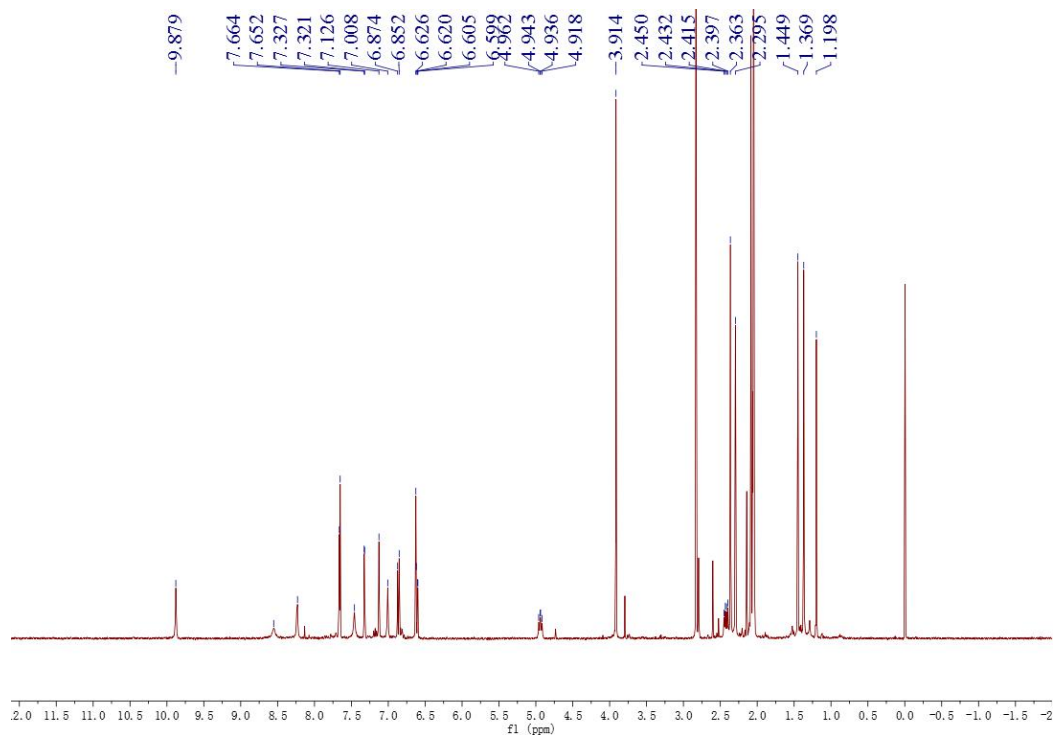

**Figure S76**  $^1\text{H}$  NMR spectrum (400 MHz, acetone- $d_6$ ) of compound **12**.

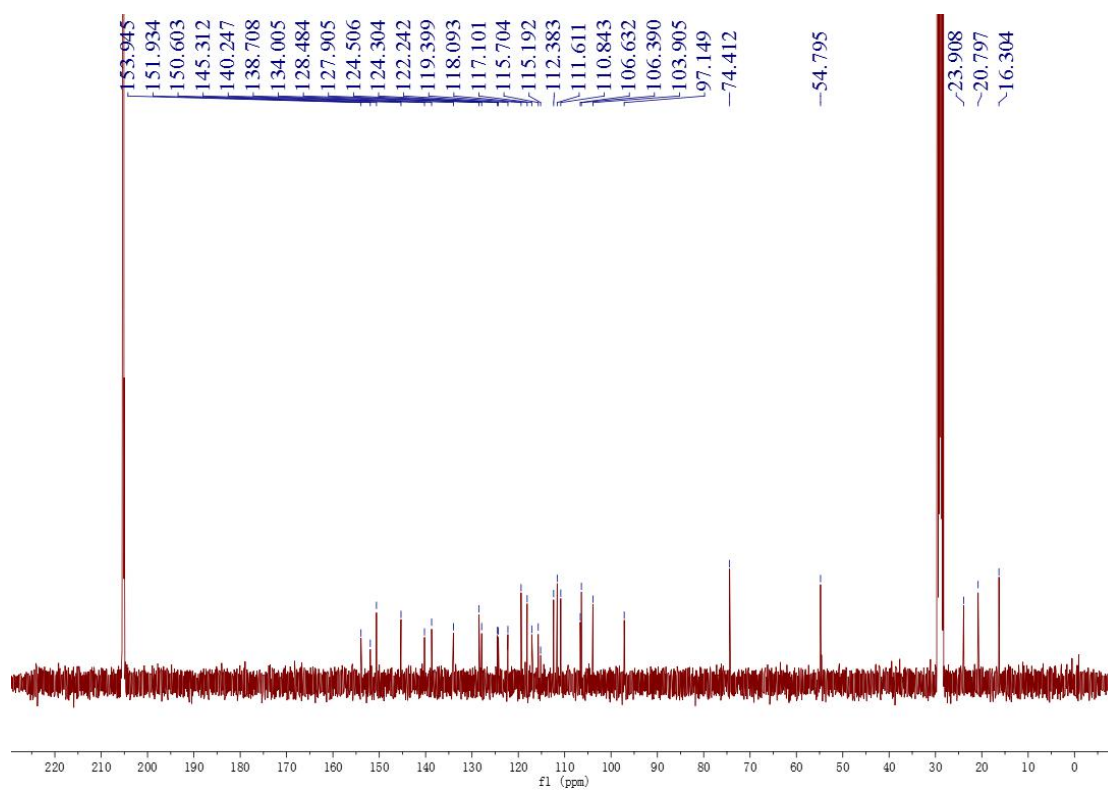

**Figure S77**  $^{13}\text{C}$  NMR spectrum (100 MHz, acetone- $d_6$ ) of compound **12**.

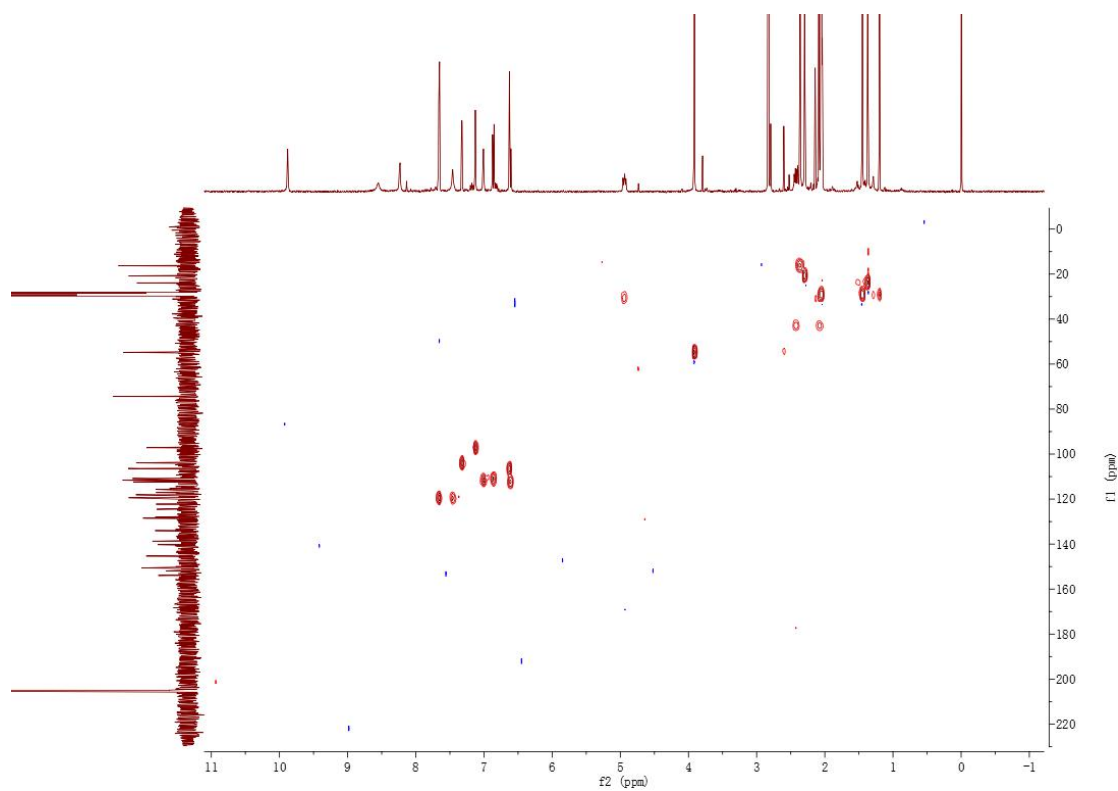

**Figure S78** HSQC spectrum of compound **12**.



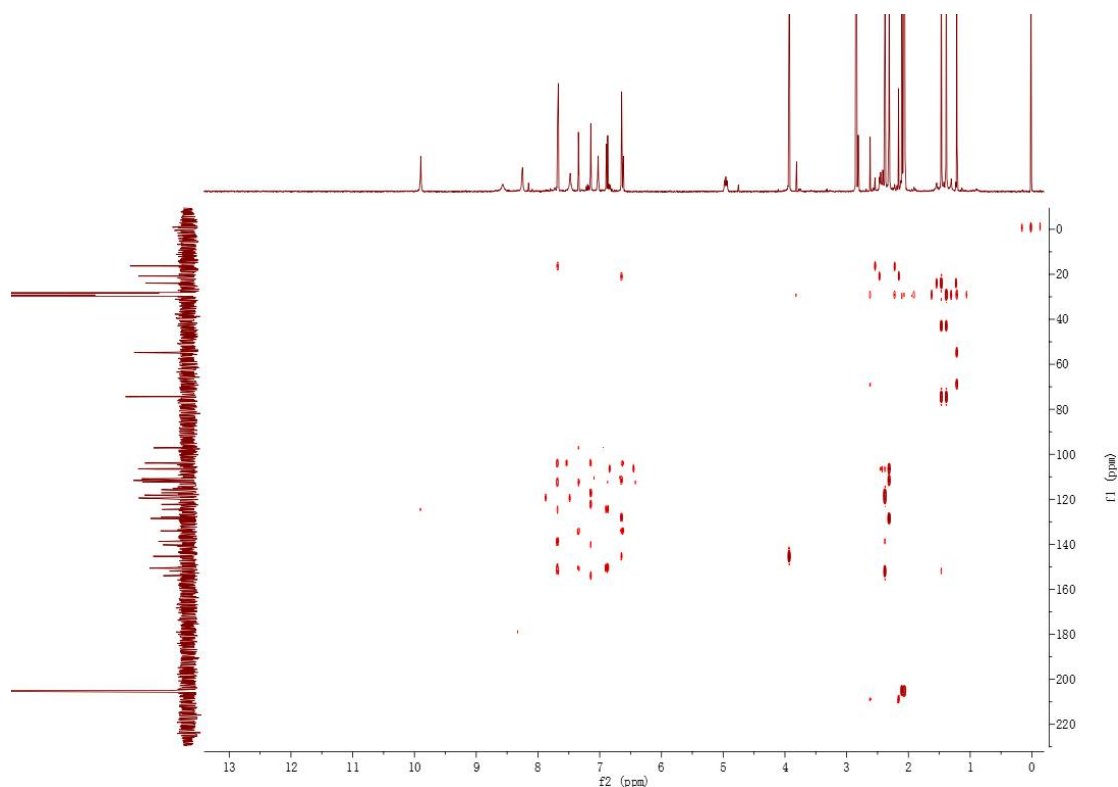

**Figure S79** HMBC spectrum of compound **12**.

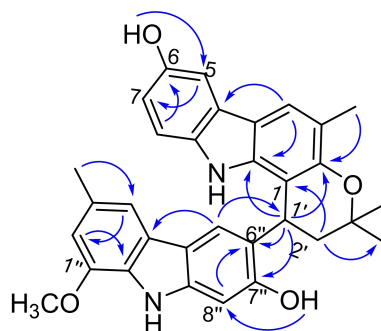

**Figure S80** Key HMBC correlations of compounds **12**.

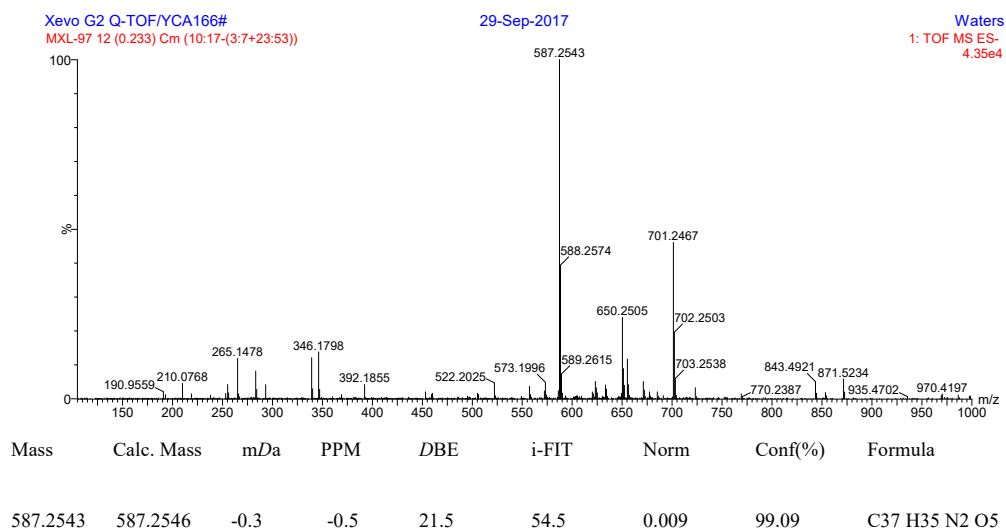

**Figure S81** HRESIMS for compound **13**.

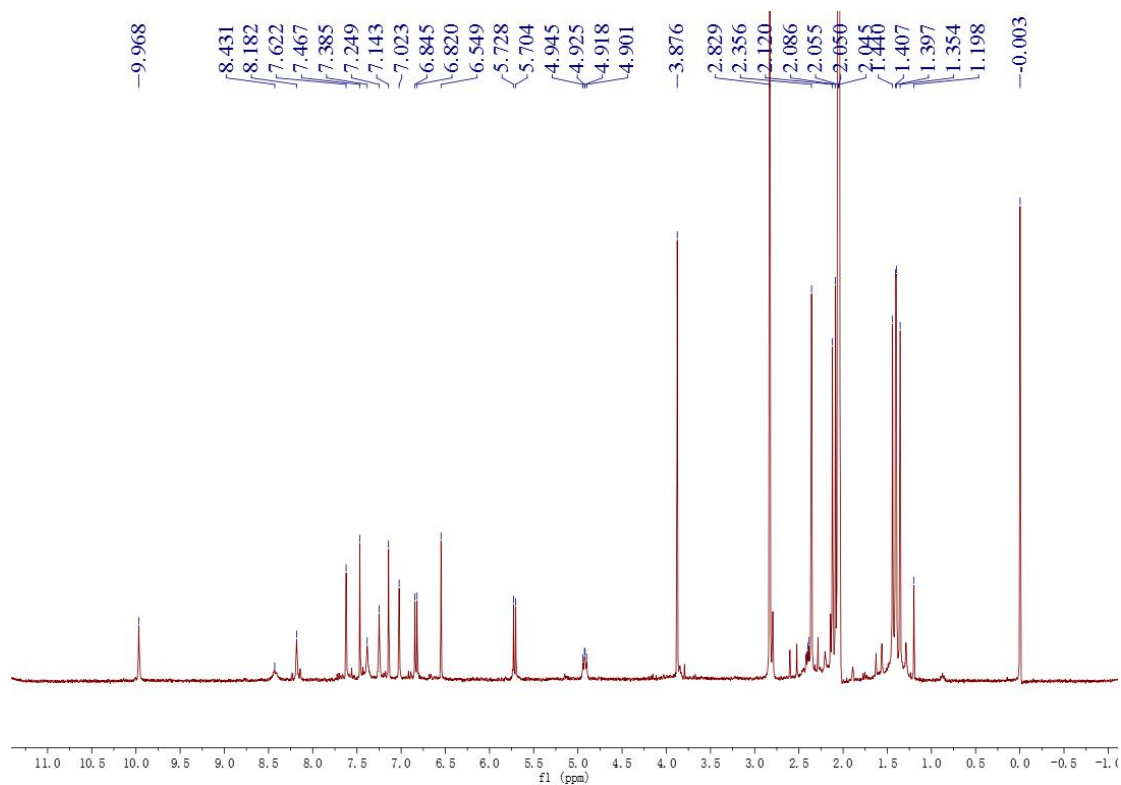

**Figure S82**  $^1\text{H}$  NMR spectrum (400 MHz, acetone- $d_6$ ) of compound **13**.

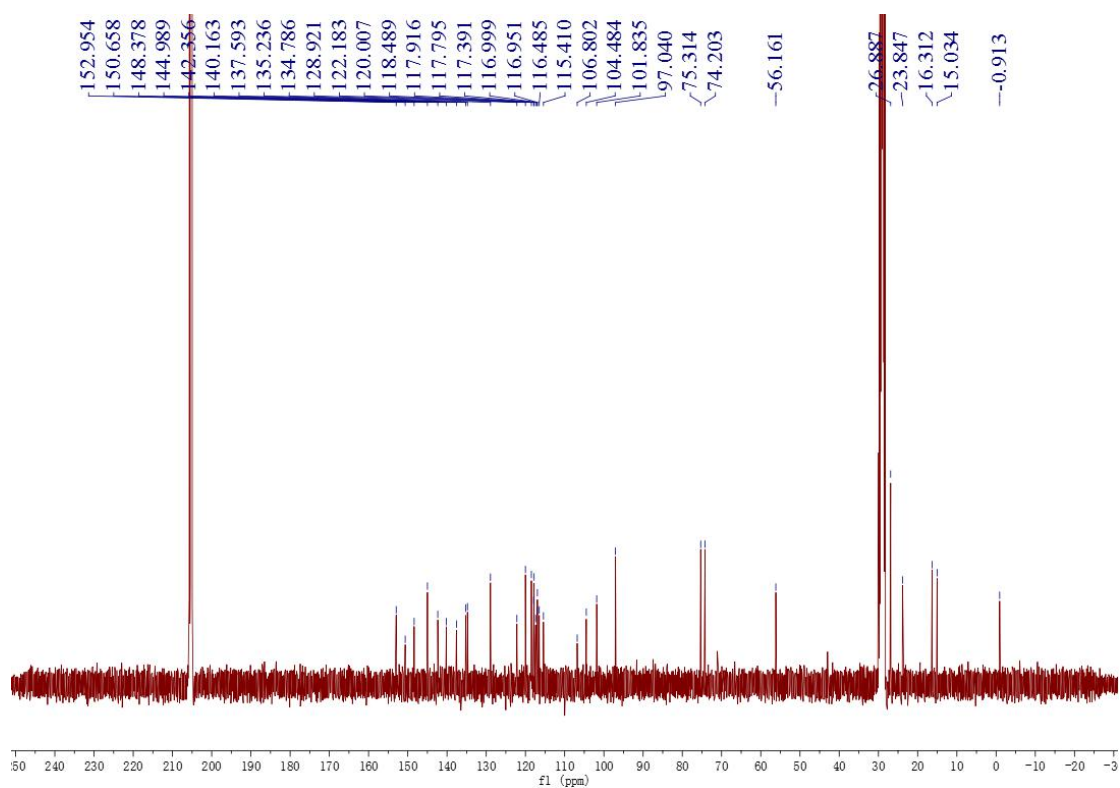

**Figure S83**  $^{13}\text{C}$  NMR spectrum (100 MHz, acetone- $d_6$ ) of compound **13**.

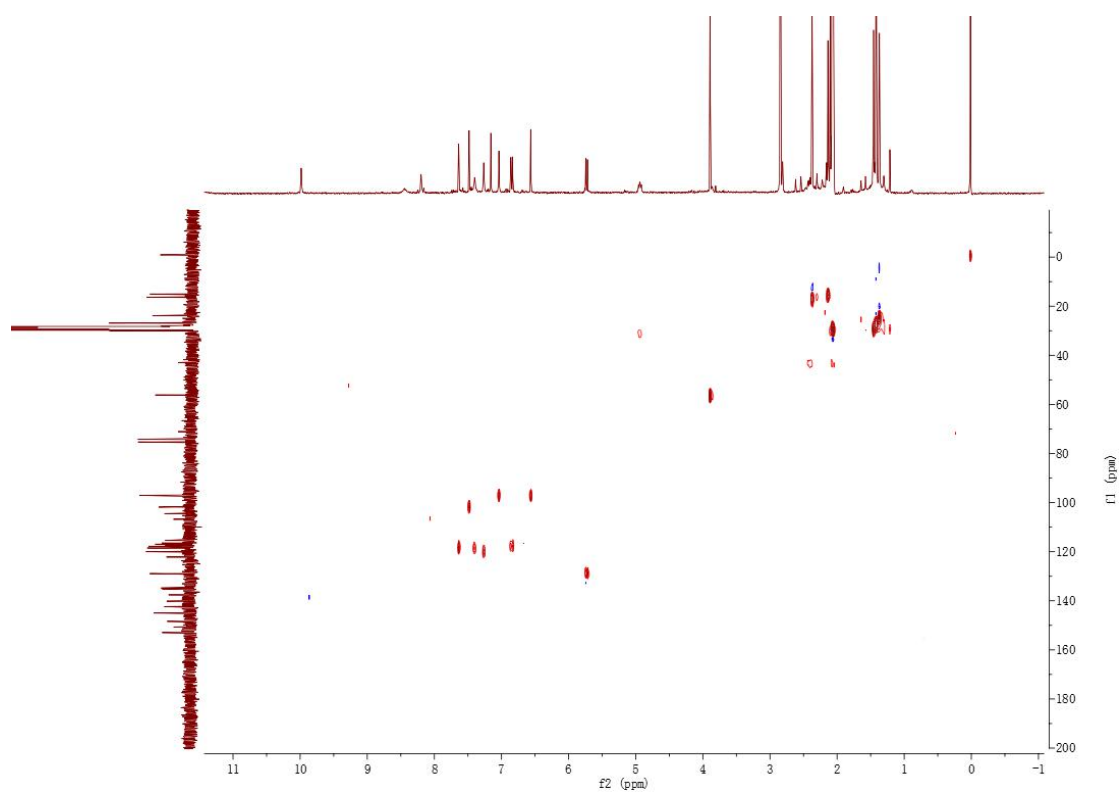

**Figure S84** HSQC spectrum of compound **13**.

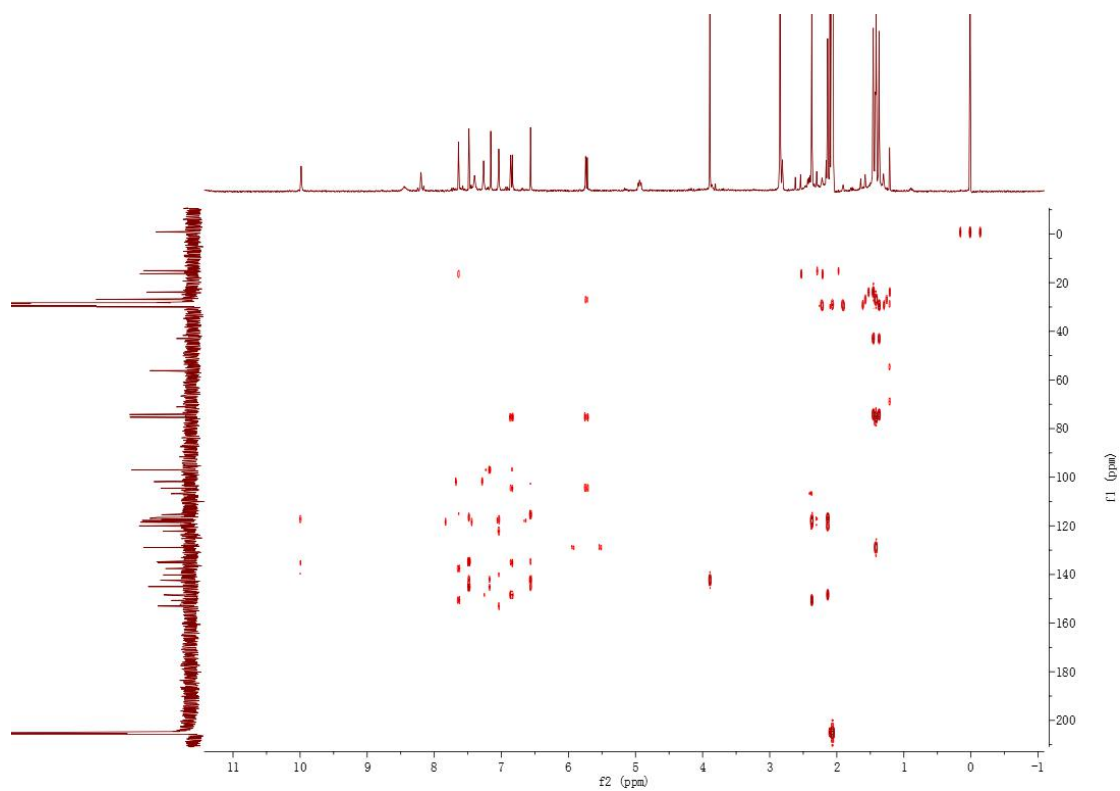

**Figure S85** HMBC spectrum of compound **13**.

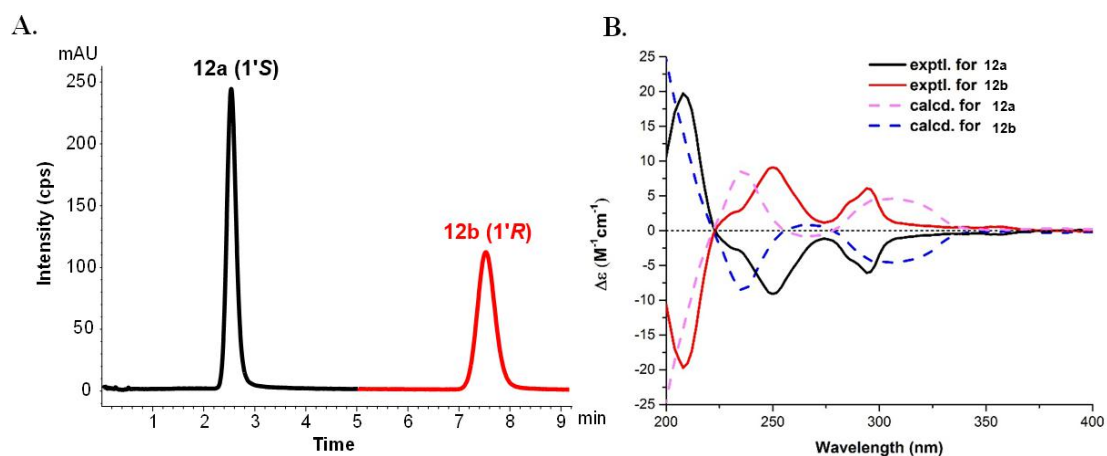

**Figure S86** The chiral HPLC separation (A) and experimental and calculated ECD data (B) of compounds **13a** and **13b**.

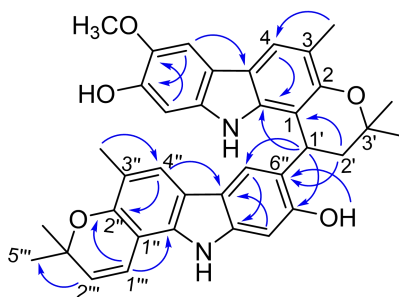

**Figure S87** Key HMBC correlations of compounds **13**.

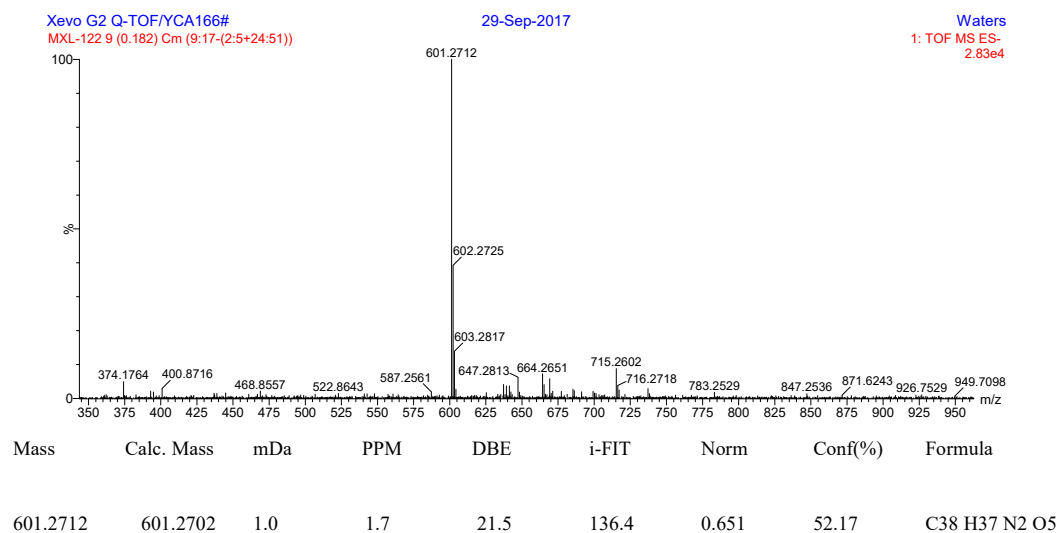

**Figure S88** HRESIMS for compound **14**.

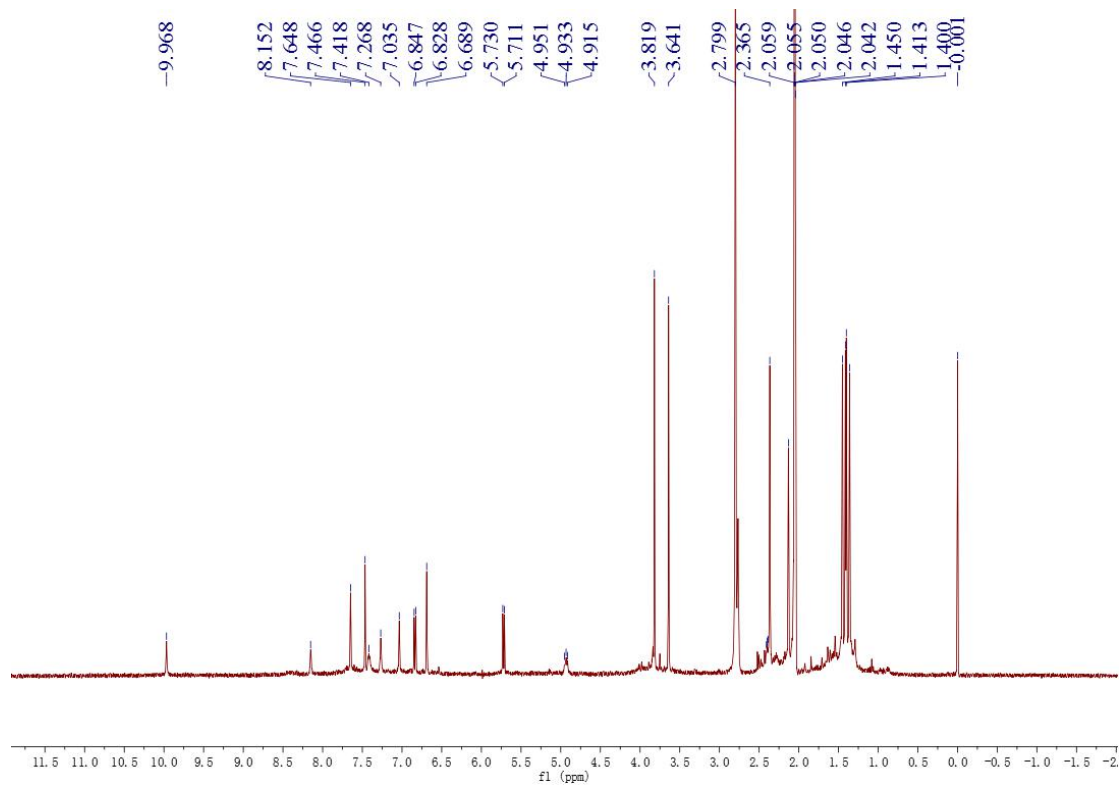

**Figure S89** <sup>1</sup>H NMR spectrum (500 MHz, acetone-*d*<sub>6</sub>) of compound 14.

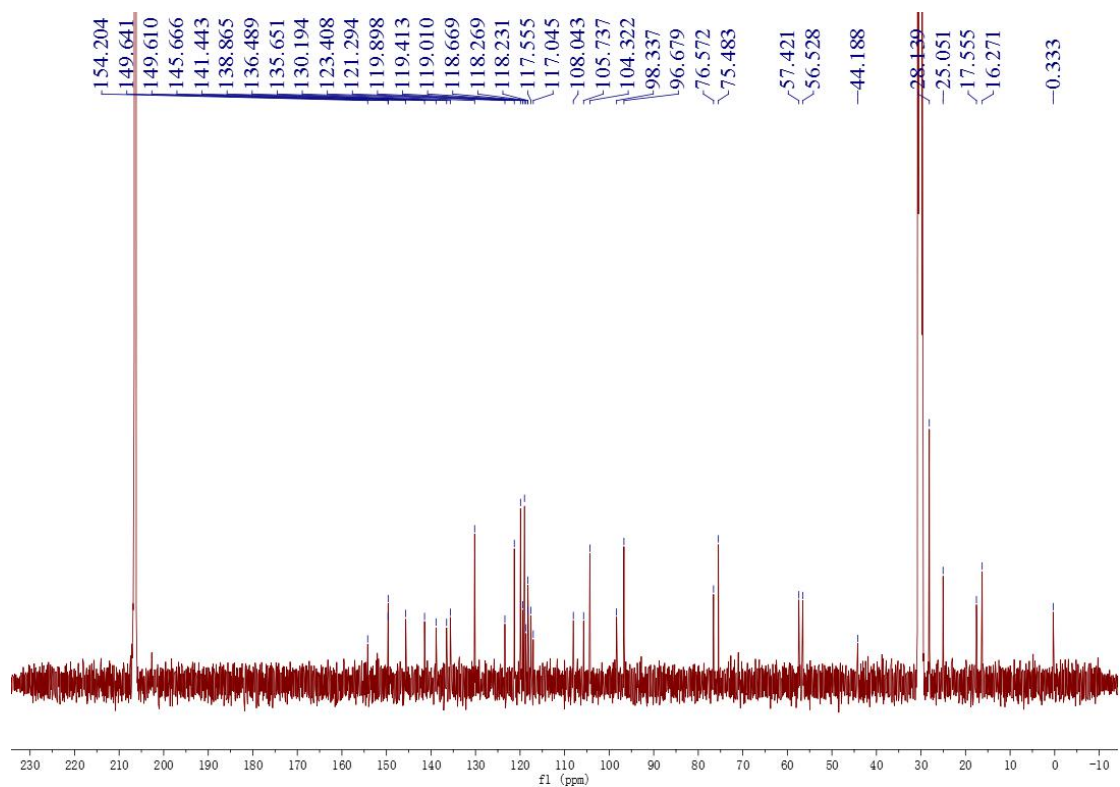

**Figure S90** <sup>13</sup>C NMR spectrum (125 MHz, acetone-*d*<sub>6</sub>) of compound 14.

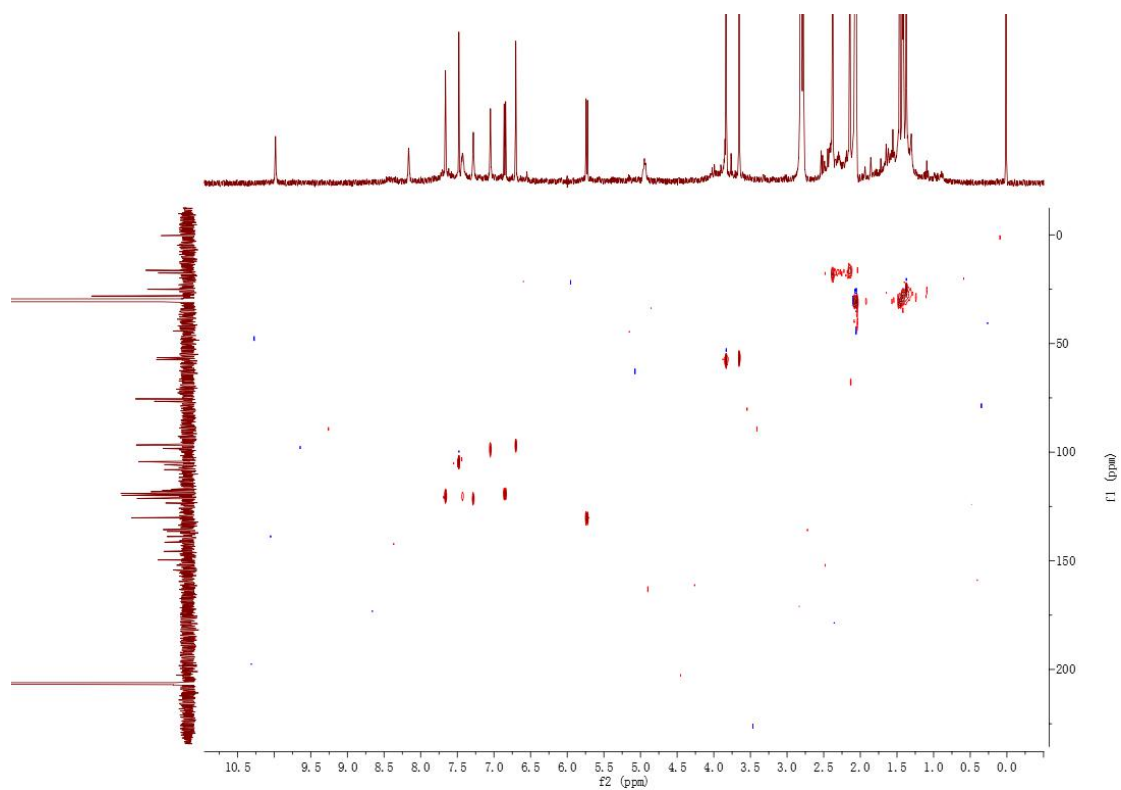

**Figure S91** HSQC spectrum of compound **14**.

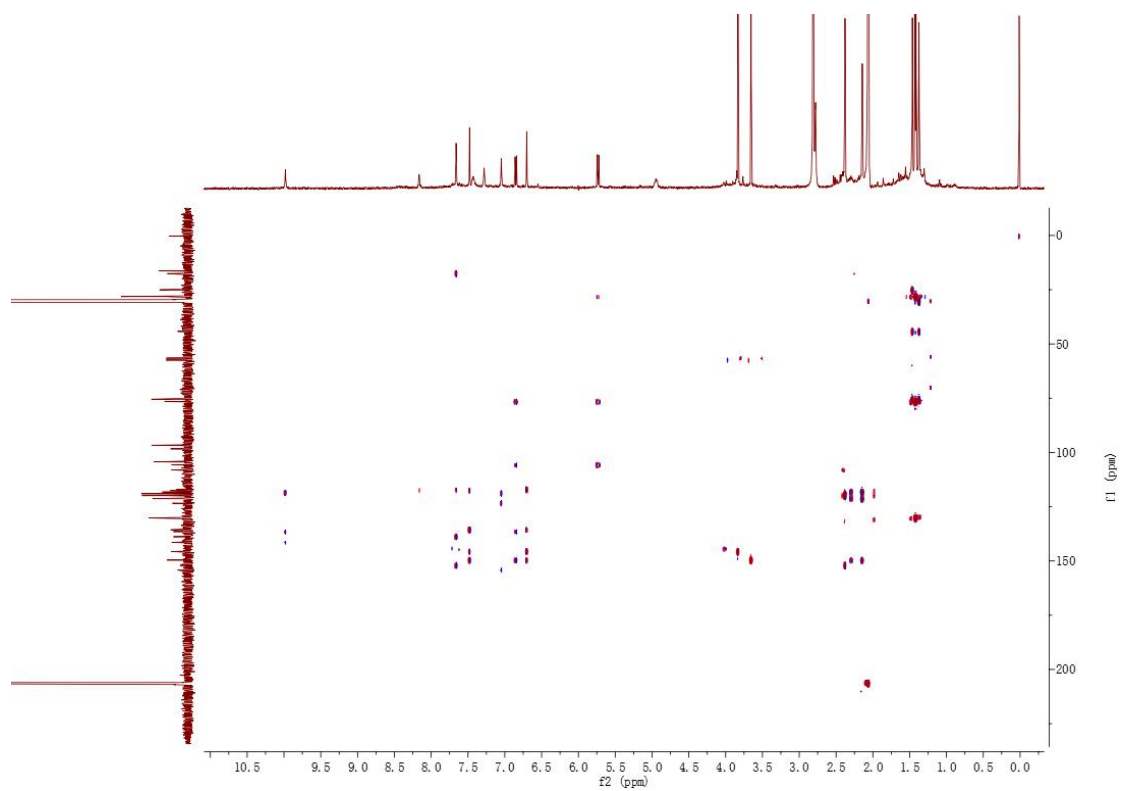

**Figure S92** HMBC spectrum of compound **14**.

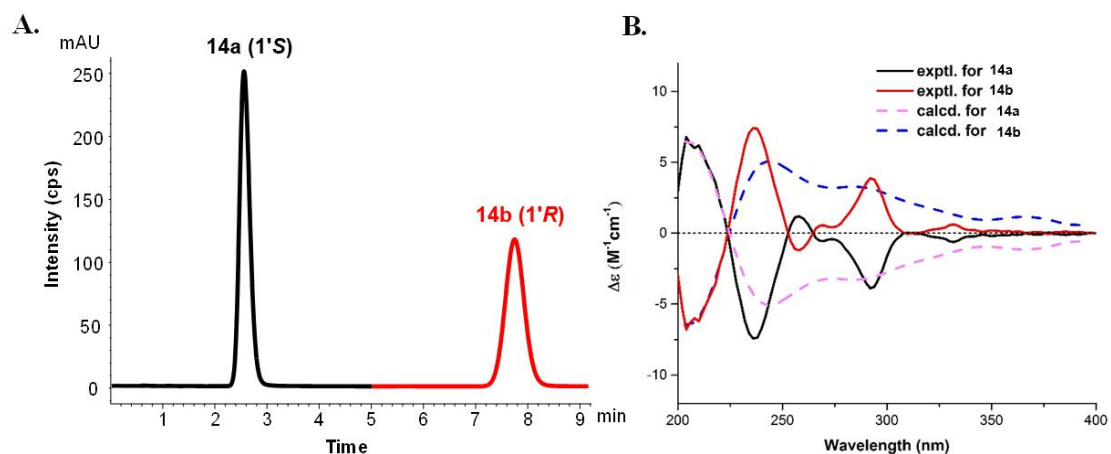

**Figure S93** The chiral HPLC separation (A) and experimental and calculated ECD data (B) of compounds **14a** and **14b**.

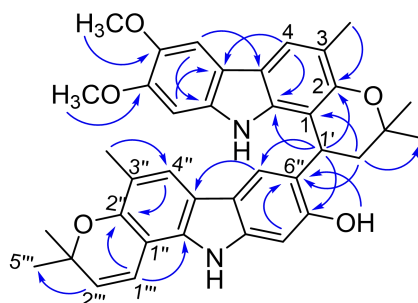

**Figure S94** Key HMBC correlations of compounds **14**.

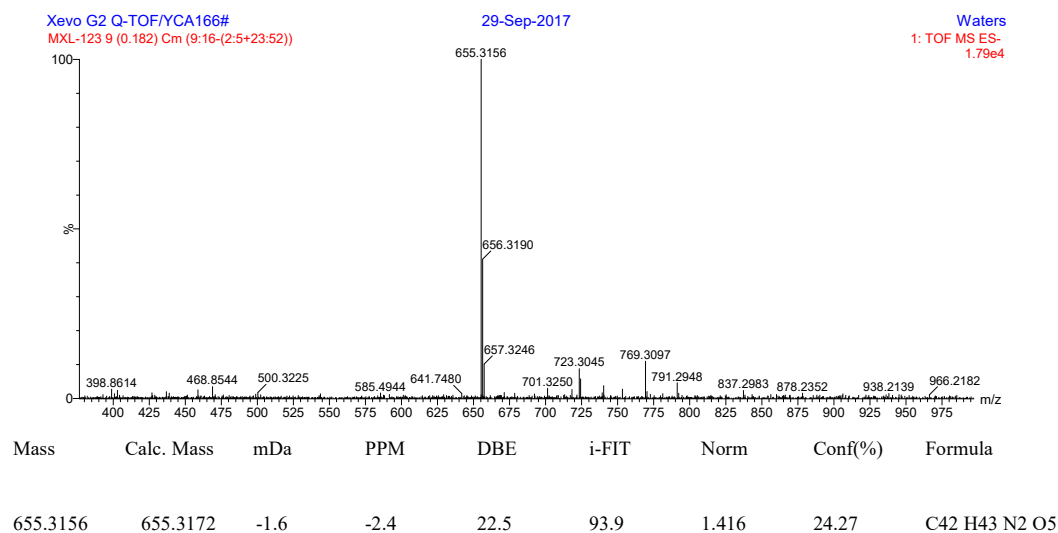

**Figure S95** HRESIMS for compound **15**.

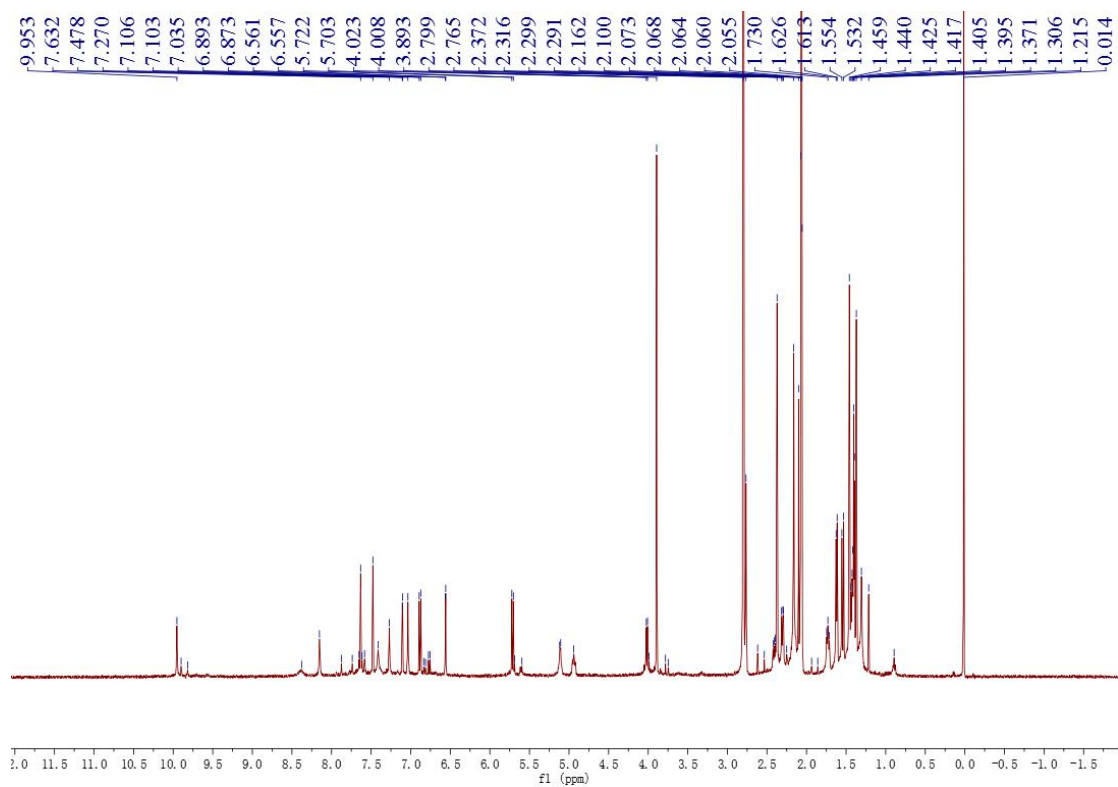

**Figure S96** <sup>1</sup>H NMR spectrum (500 MHz, acetone-*d*<sub>6</sub>) of compound 15.

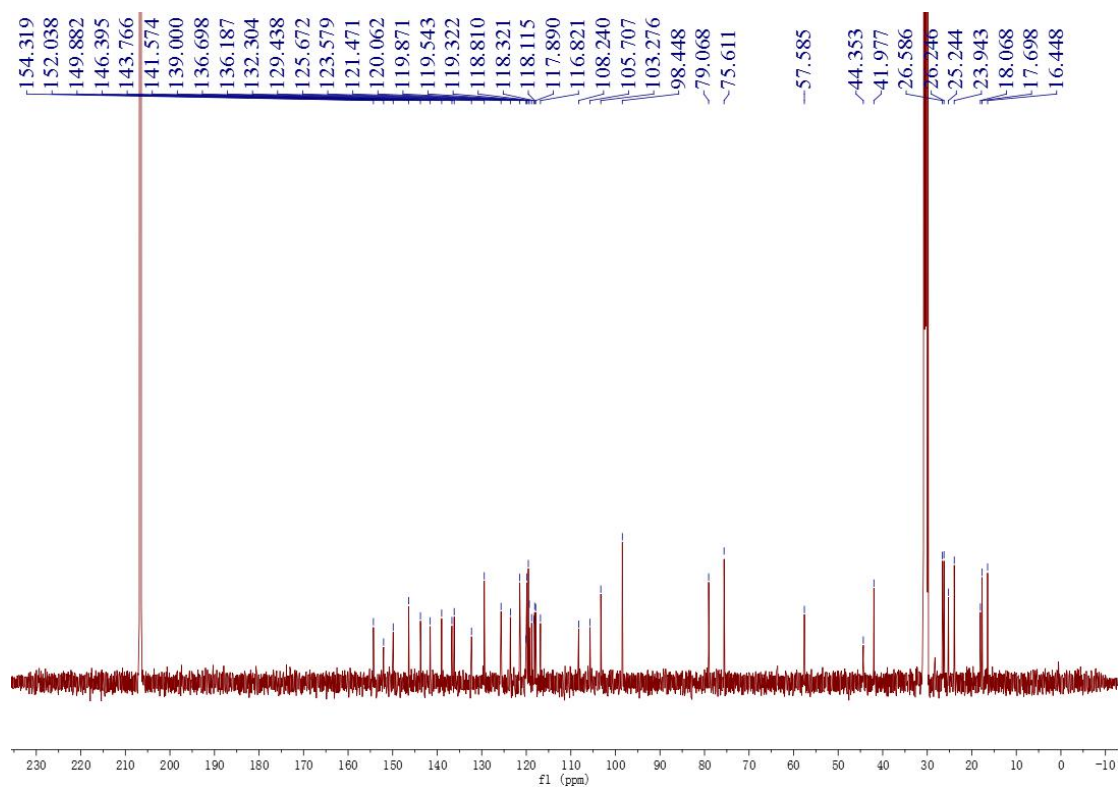

**Figure S97** <sup>13</sup>C NMR spectrum (125 MHz, acetone-*d*<sub>6</sub>) of compound 15.



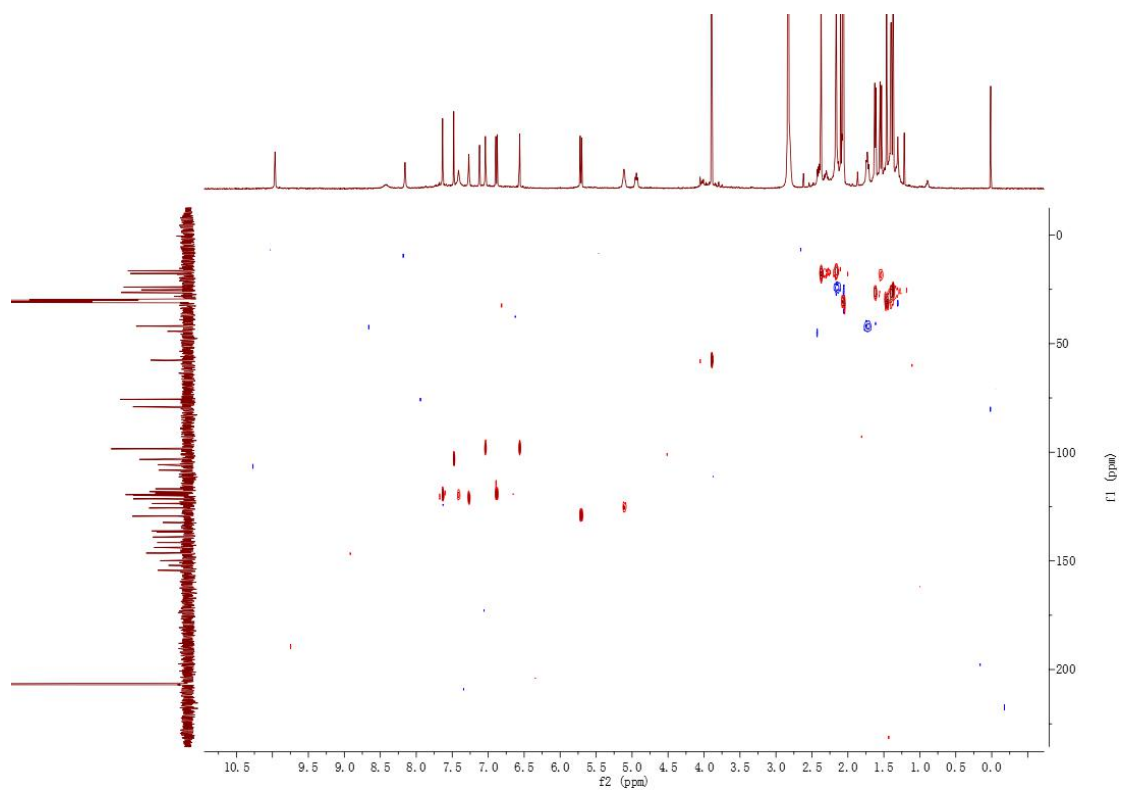

**Figure S98** HSQC spectrum of compound **15**.

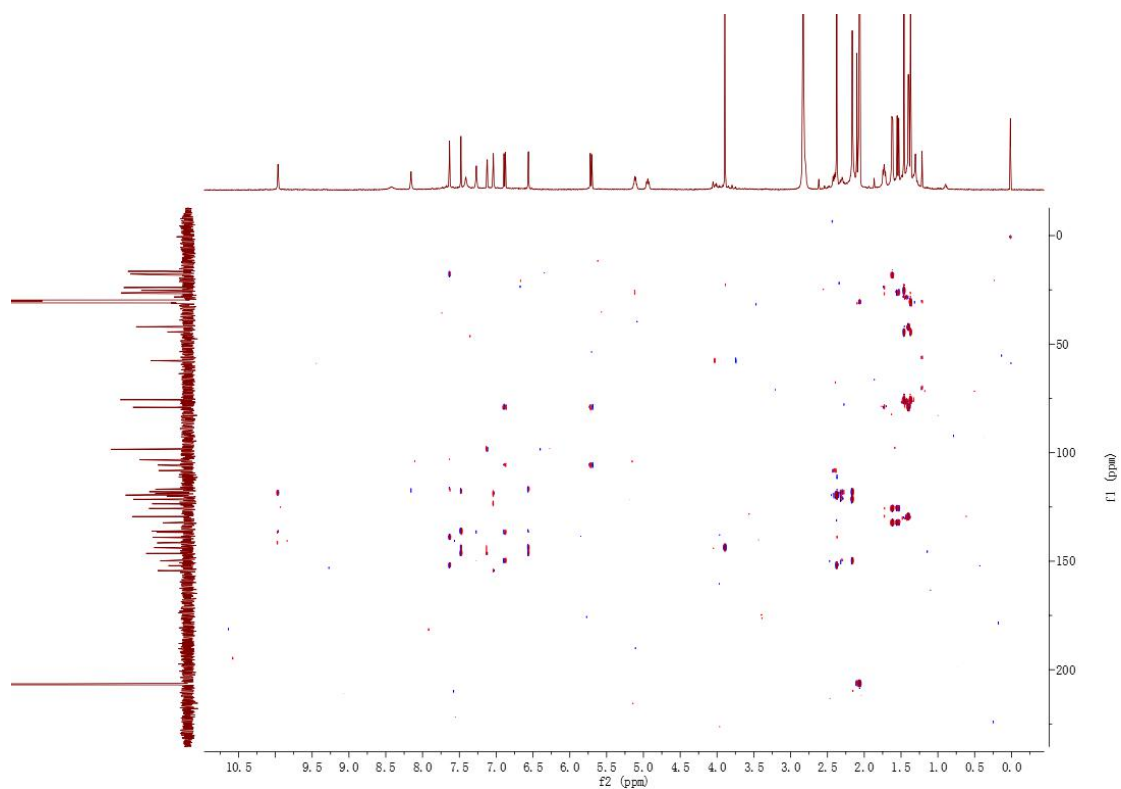

**Figure S99** HMBC spectrum of compound **15**.

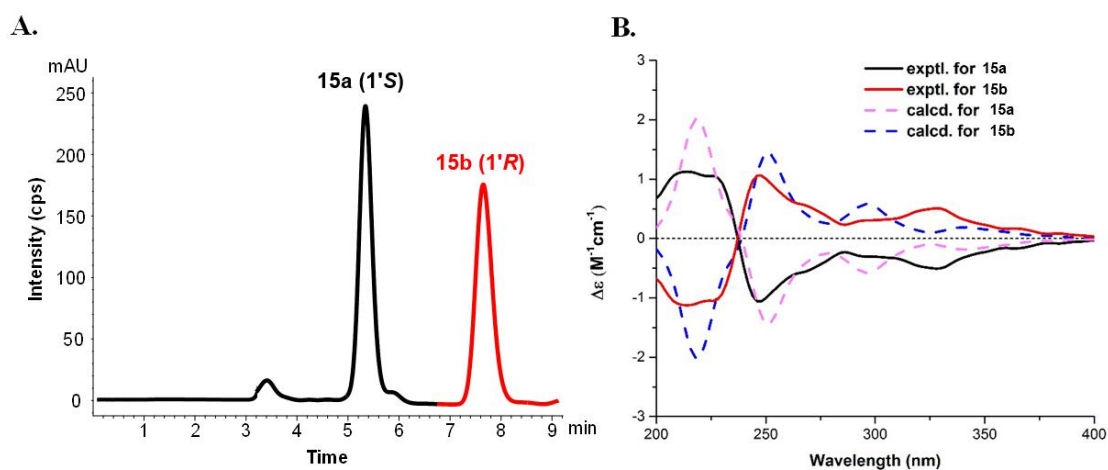

**Figure S100** The chiral HPLC separation and experimental and calculated ECD data of compounds **15a** and **15b**.

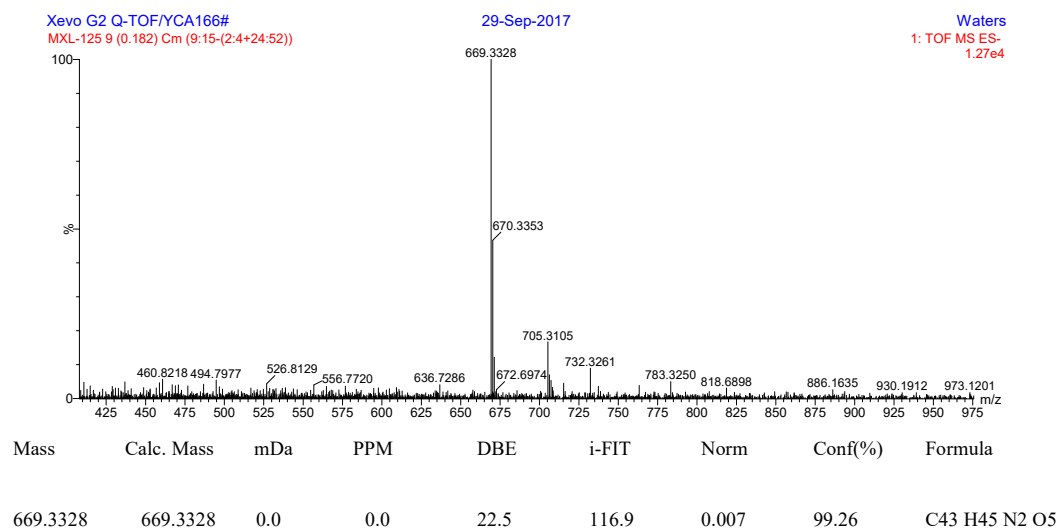

**Figure S101** HRESIMS for compound **16**.

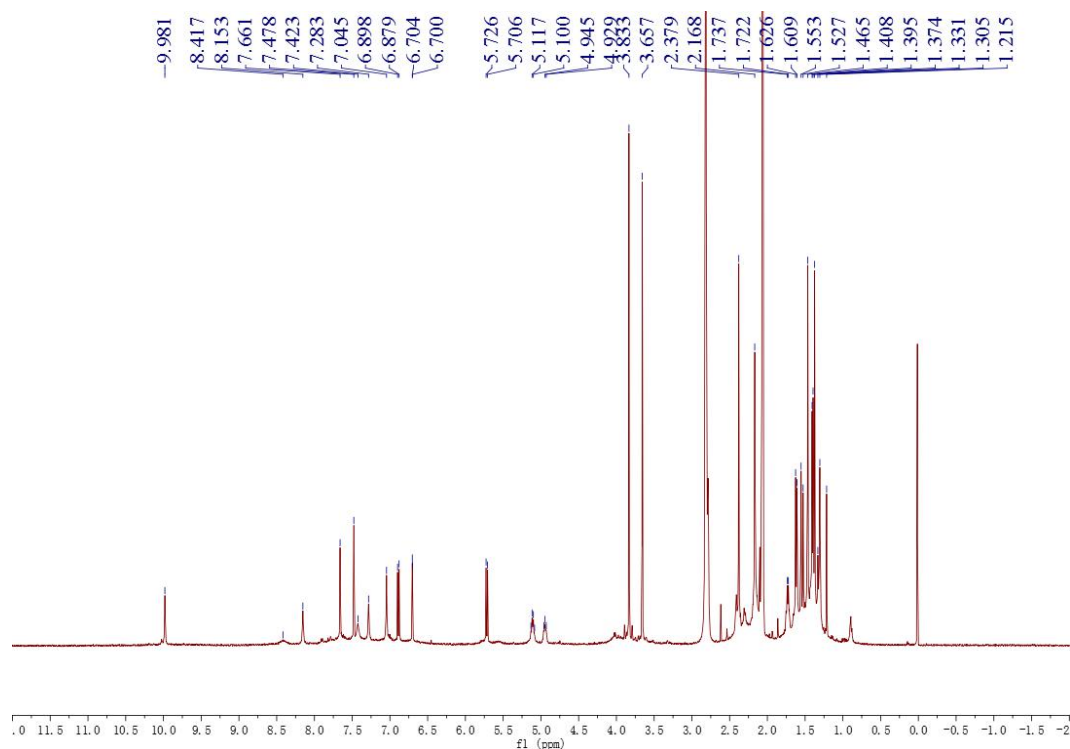

**Figure S102** <sup>1</sup>H NMR spectrum (500 MHz, acetone-*d*<sub>6</sub>) of compound 16.

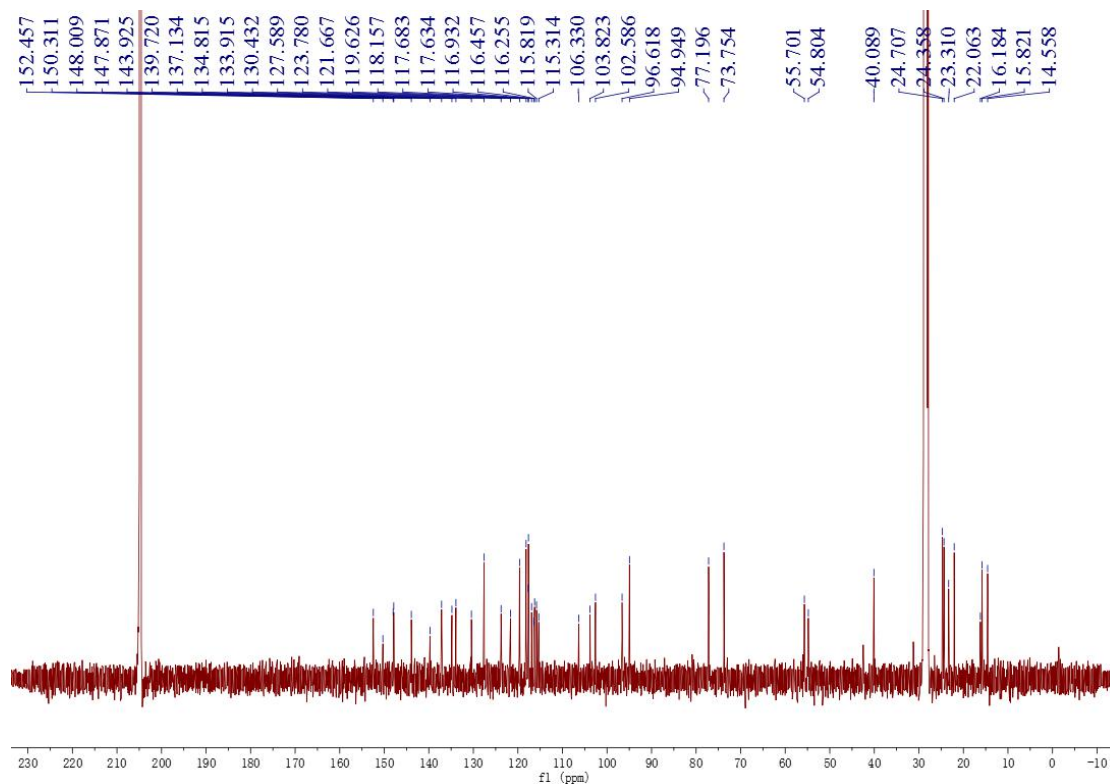

**Figure S103** <sup>13</sup>C NMR spectrum (125 MHz, acetone-*d*<sub>6</sub>) of compound 16.

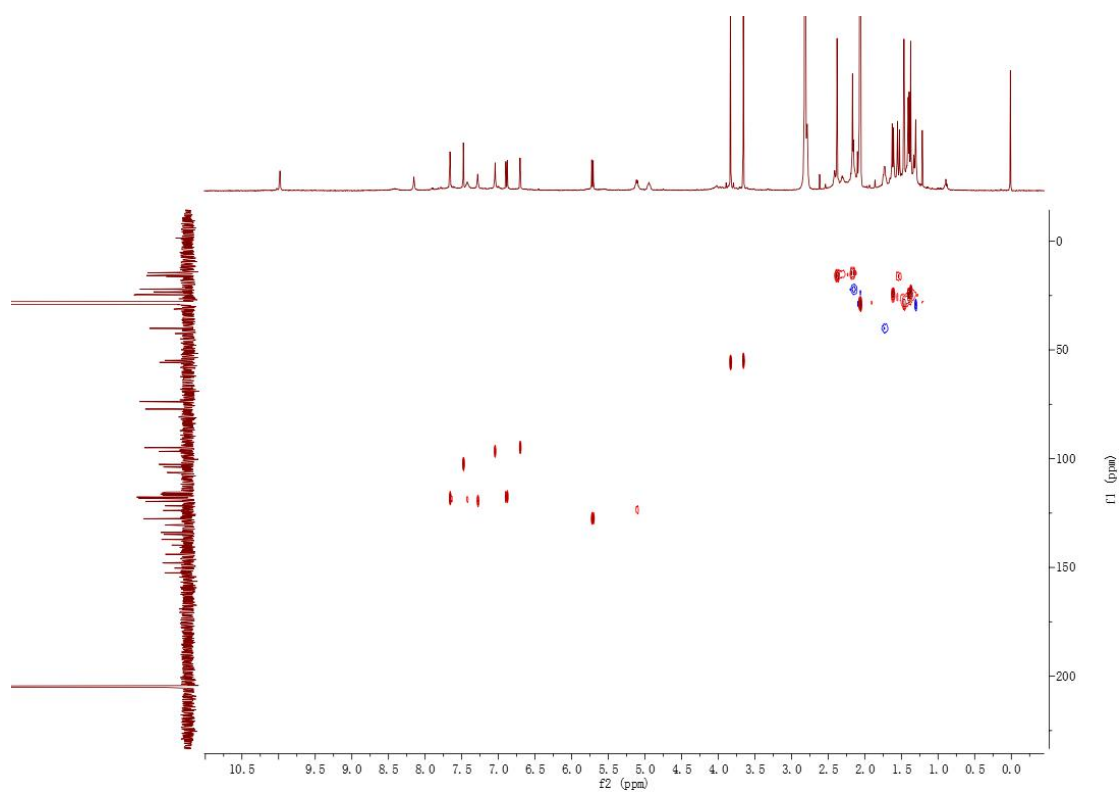

**Figure S104** HSQC spectrum of compound 16.

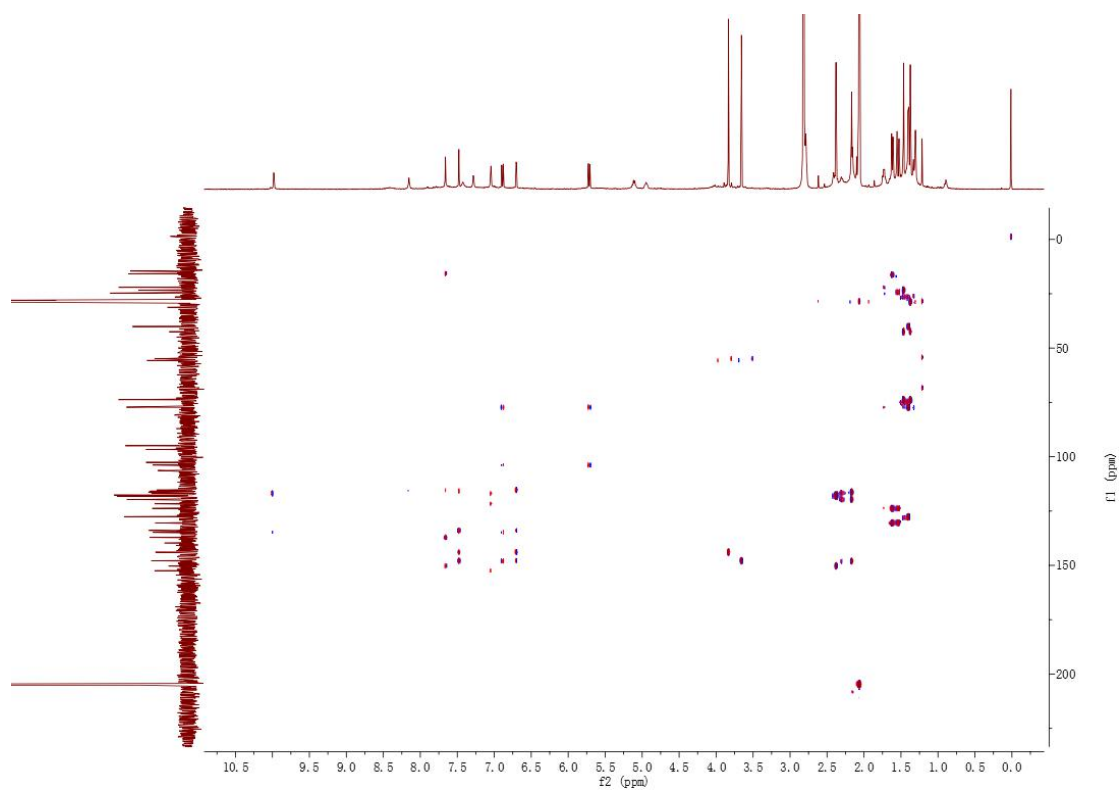

**Figure S105** HMBC spectrum of compound 16.

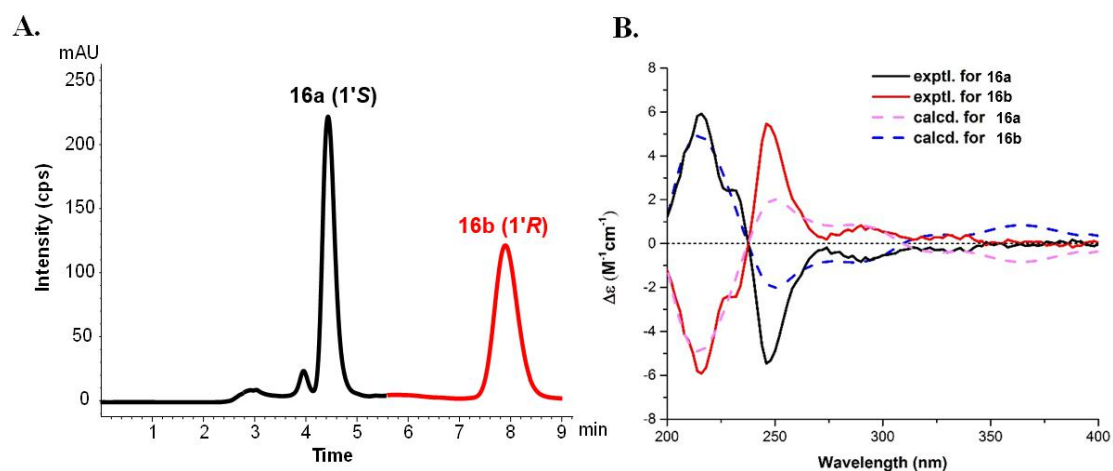

**Figure S106** The chiral HPLC separation (A) and experimental and calculated ECD data (B) of compounds **16a** and **16b**.

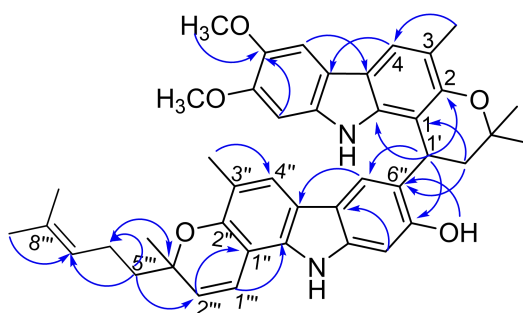

**Figure S107** Key HMBC correlations of compounds **16**.

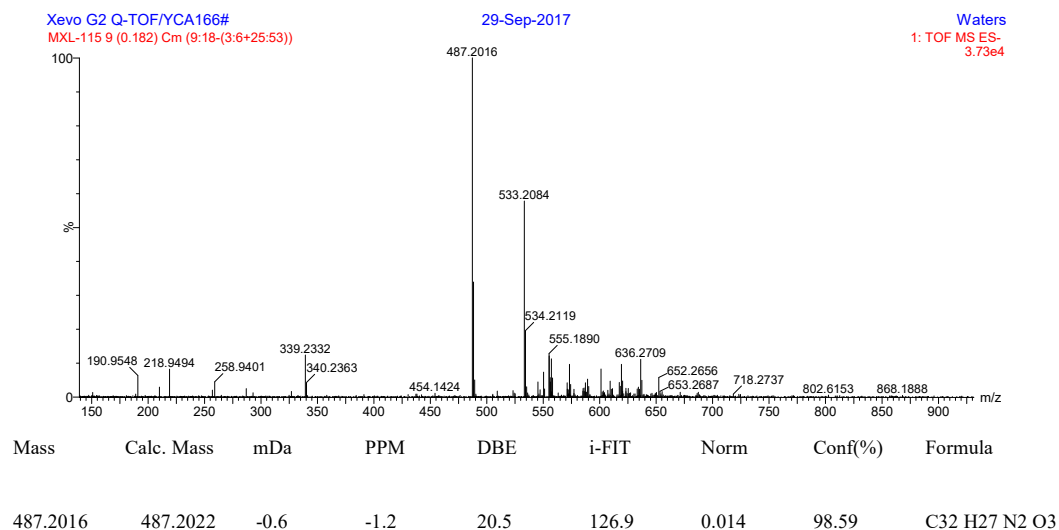

**Figure S108** HRESIMS for compound **17**.

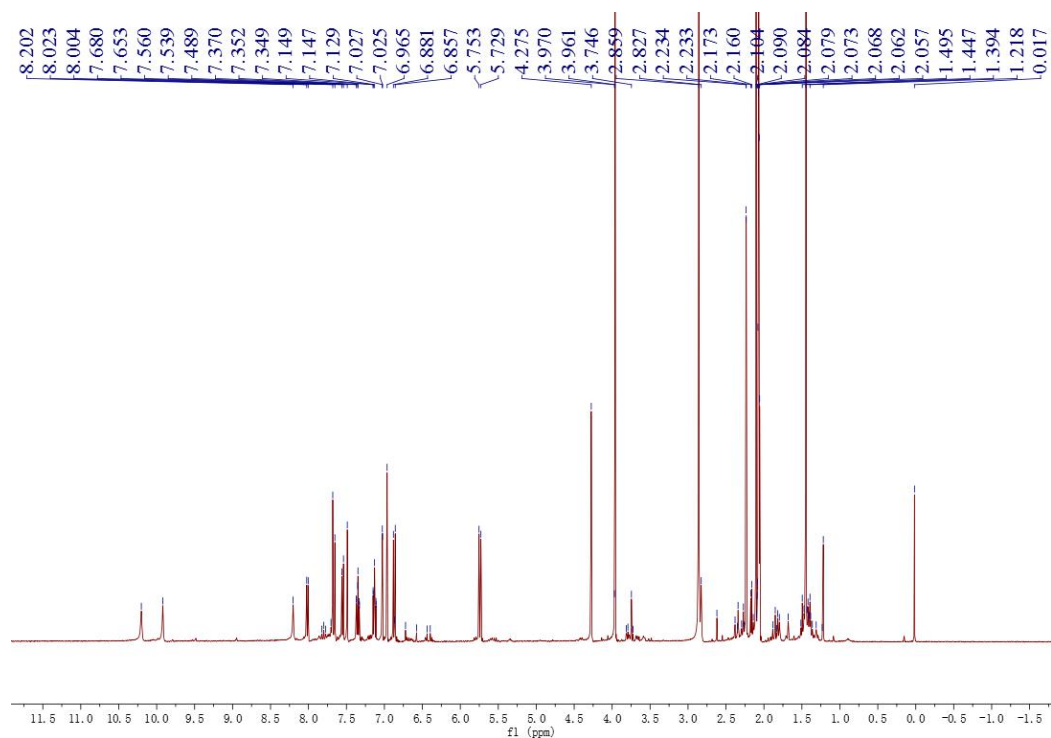

**Figure S109**  $^1\text{H}$  NMR spectrum (400 MHz, acetone- $d_6$ ) of compound **17**.

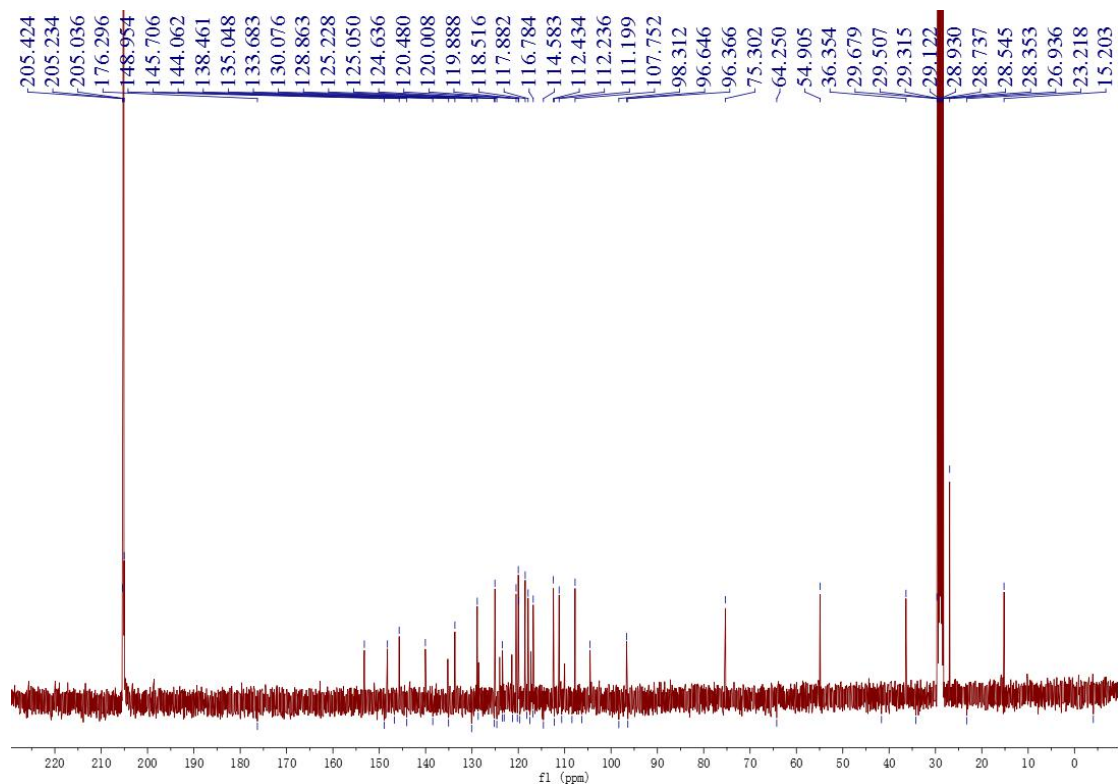

**Figure S110**  $^{13}\text{C}$  NMR spectrum (100 MHz, acetone- $d_6$ ) of compound **17**.

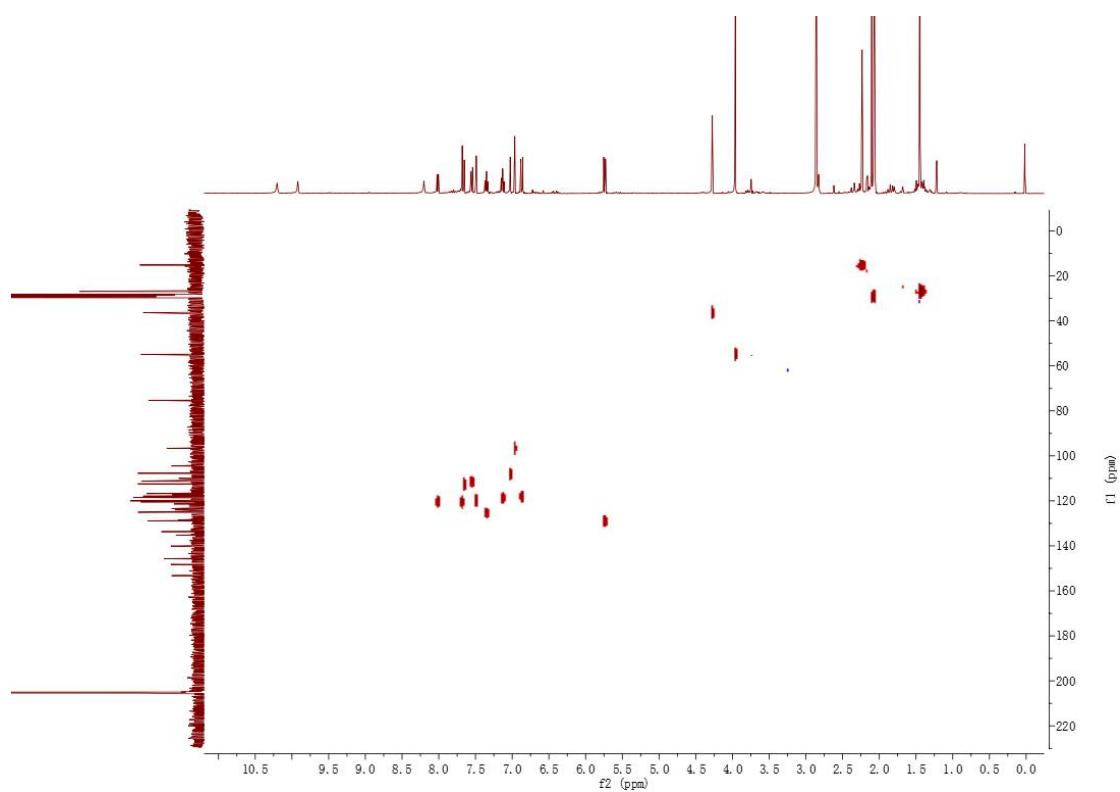

**Figure S111** HSQC spectrum of compound 17.

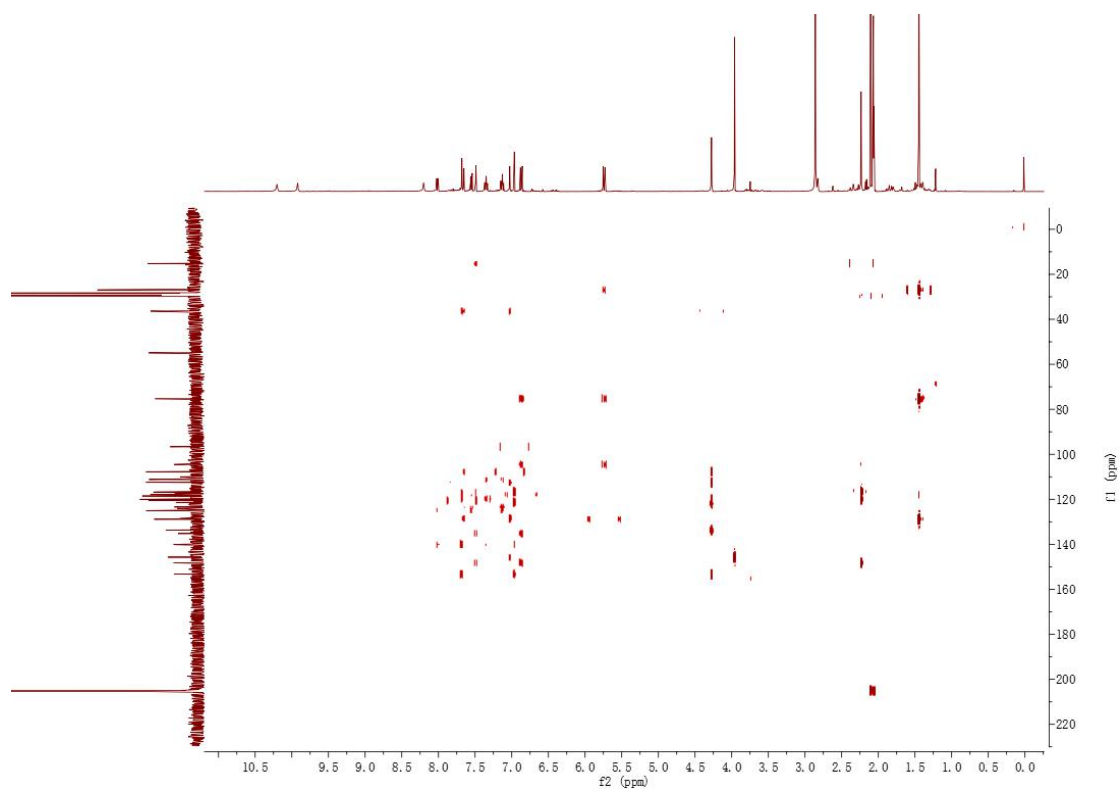

**Figure S112** HMBC spectrum of compound 17.
